# Supplementary material for: Controlled and efficient polymerization of methyl methacrylate catalyzed by pyridinylidenaminophosphine based Lewis pairs
Source: Royal Society of Chemistry journal article supplement (doi:10.1039/d1py00579k), 2021-01-01
Supplement: d1py00579k1.pdf [file d1py00579k1.pdf]

# Controlled and Efficient Polymerization of Methyl Methacrylate Catalyzed by Pyridinylidenaminophosphines Based Lewis Pairs

Fang Ge<sup>a</sup>, Sun Li<sup>b</sup>, Zhe Wang<sup>b</sup>, Wenzhong Zhang<sup>c</sup>, Xiaowu Wang<sup>b,\*</sup>

## **Tables of Contents**

**1 Synthesis of Pyridinylidenaminophosphines (PyAPs)**

**2 Stoichiometric NMR Reactions**

**3 Additional Polymerization Data**

**4 MALDI-TOF MS Spectra of Low  $M_w$  PMMA**

**5 X-ray data of PyAP-*t*Bu and INT1**

**6 Proposed Polymerization Mechanism**

# 1 Synthesis of Pyridinylidenaminophosphines (PyAPs)

## Synthesis of pyridyl salt 1

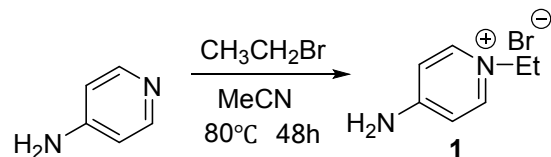

2-Aminopyridine (5.00 g, 53.1 mmol, 1 eq.) and bromoethane (5.9 mL, 79.7 mmol, 1.5 eq.) were dissolved in MeCN (50 mL) and heated at 80 °C for 48 h.

The salt was precipitated out of the solution with Et<sub>2</sub>O (100 mL), filtered off and washed with Et<sub>2</sub>O. The colourless powder was dried in vacuo at 80 °C for 16 h.

Yield: 9.3g (86.2%)

<sup>1</sup>H NMR (400 MHz, DMSO-d<sub>6</sub>, 298 K): δ (ppm) = 8.48 (s, 1H), 8.12 (d, <sup>3</sup>J<sub>HH</sub> = 6.7 Hz, 1H), 7.87 (dd, <sup>3</sup>J<sub>HH</sub> = 8.9, 7.1 Hz, 1H), 7.09 (d, <sup>3</sup>J<sub>HH</sub> = 8.9 Hz, 1H), 6.92 (t, <sup>3</sup>J<sub>HH</sub> = 6.9 Hz, 0H), 4.20 (q, <sup>3</sup>J<sub>HH</sub> = 7.2 Hz, 1H), 1.30 (t, <sup>3</sup>J<sub>HH</sub> = 7.2 Hz, 2H).

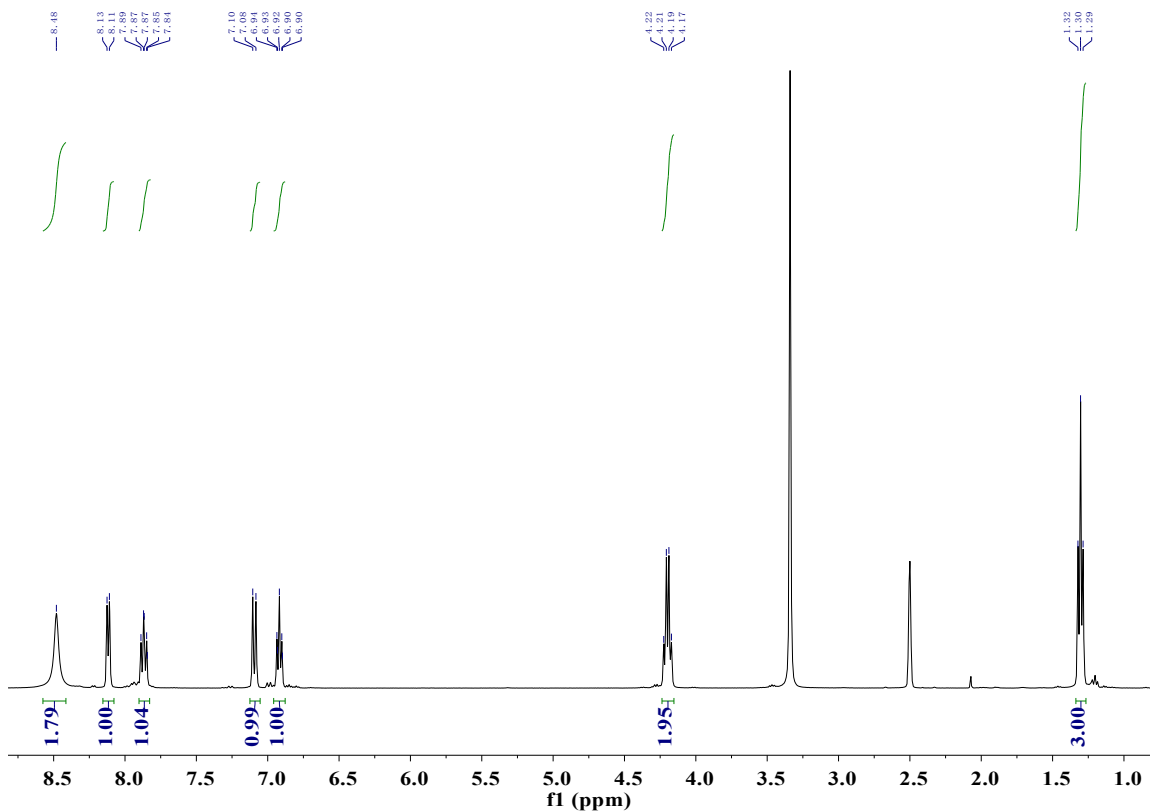

Figure S1. <sup>1</sup>H NMR (400 MHz, DMSO-d<sub>6</sub>, 298 K)

## Synthesis of PyAP-<sup>t</sup>Bu

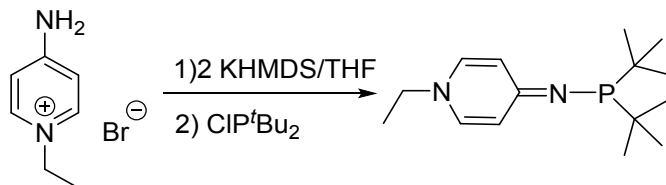

Pyridinium salt (1.015 g, 5 mmol, 1 equiv.), KHMDS (10 mL, 1 M in THF, 10 mmol, 2 equiv.) and CIP<sup>t</sup>Bu<sub>2</sub> (0.95 mL, 5 mmol, 1 equiv.) were suspended in THF (10 mL). After overnight stirring, all volatile compounds were removed in *vacuo* and the residue was extracted with n-hexane (3×30 mL) to give the corresponding phosphine as bright yellow solid in 83% yield (1.10 g, 4.13 mmol). Suitable single crystals were obtained from PyAP-<sup>t</sup>Bu hexane solution at -30°C for 2 days.

<sup>1</sup>H NMR (400 MHz, C<sub>6</sub>D<sub>6</sub>, 298 K) δ (ppm) = 6.80-6.76 (m, 1H), 5.79 (d, <sup>3</sup>J<sub>HH</sub> = 7.5 Hz, 1H), 2.31 (q, <sup>3</sup>J<sub>HH</sub> = 7.2 Hz, 1H), 1.42 (d, <sup>3</sup>J<sub>HH</sub> = 10.8 Hz, 9H), 0.39 (t, <sup>3</sup>J<sub>HH</sub> = 7.3 Hz, 2H). <sup>31</sup>P{<sup>1</sup>H} NMR (162 MHz, C<sub>6</sub>D<sub>6</sub>, 298 K) δ (ppm) = 68.9 (s).

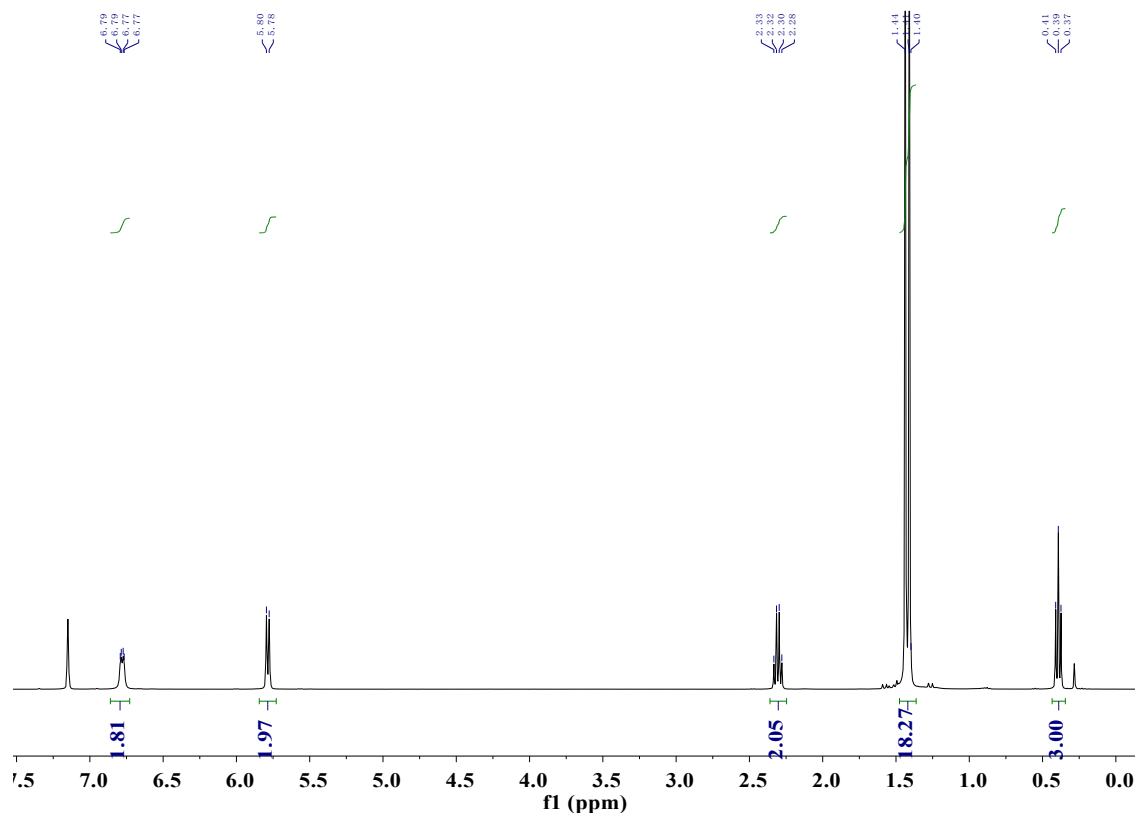

**Figure S2.**  $^1\text{H}$  NMR spectrum of PyAP- $t$ Bu (400 MHz,  $\text{C}_6\text{D}_6$ , 298 K)

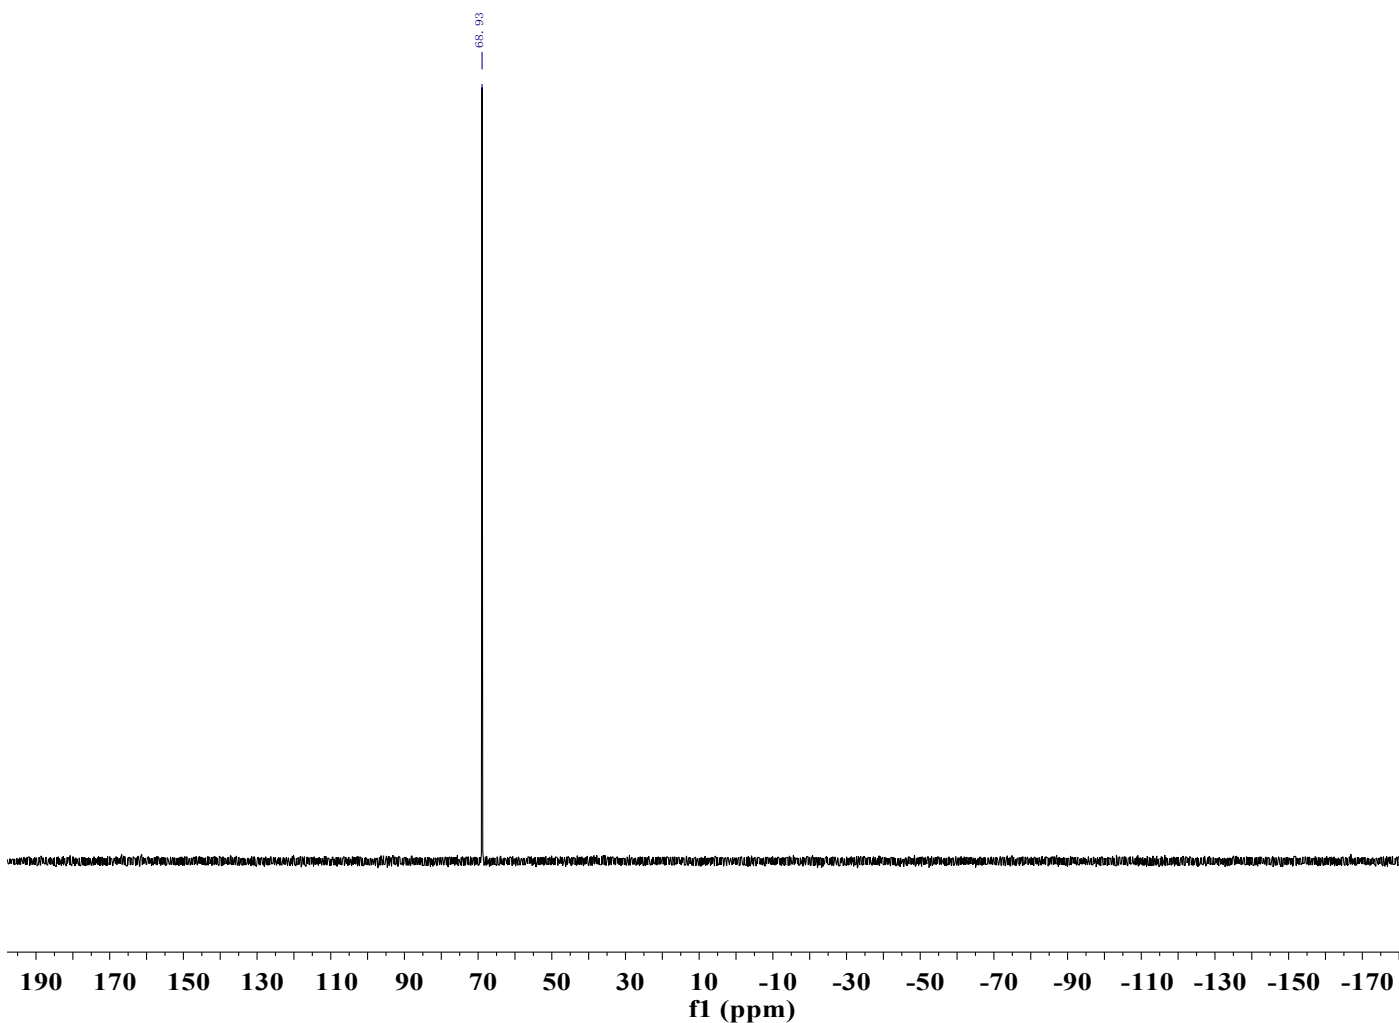

**Figure S3.**  $^{31}\text{P}\{^1\text{H}\}$  NMR spectrum of PyAP- $t$ Bu (162 MHz,  $\text{C}_6\text{D}_6$ , 298 K)

### Synthesis of PyAP-Cy

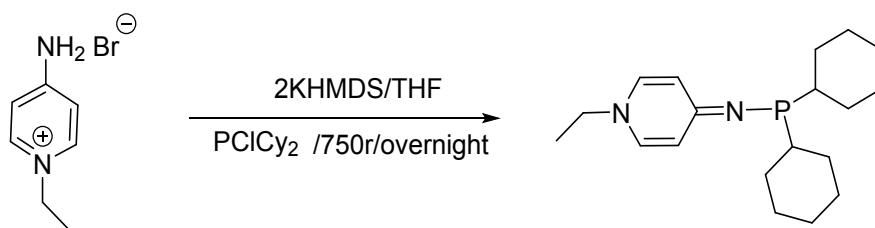

PyAP-Cy was prepared and isolated as yellow solid using the same procedure as described for the preparation of  $\text{P}^i\text{P}^t\text{Bu}_2$ . Pyridinium salt (1.015 g, 5 mmol, 1 equiv.), KHMDs (10 mL, 1 M in THF, 10 mmol, 2 equiv.) and  $\text{ClPCy}_2$  (1.1 mL, 5 mmol, 1 equiv.) were

suspended in THF (10 mL). After overnight stirring, all volatile compounds were removed in *vacuo* and the residue was extracted with n-hexane (3×20 mL) to give the corresponding phosphine as bright yellow solid in 64% yield (1.02 g, 3.2 mmol).

$^1\text{H}$  NMR (400 MHz,  $\text{C}_6\text{D}_6$ , 298 K)  $\delta$  (ppm) = 6.95 (s, 0H), 6.56 (s, 1H), 5.59 (d,  $^3J_{\text{HH}} = 7.4$  Hz, 1H), 2.11 (q,  $^3J_{\text{HH}} = 7.3$  Hz, 1H), 2.03 (d,  $^3J_{\text{PH}} = 13.0$  Hz, 1H), 1.95-1.87 (m, 1H), 1.81 (td,  $^3J_{\text{PH}} = 11.9, 3.5$  Hz, 1H), 1.68-1.57 (m, 2H), 1.50-1.35 (m, 2H), 1.14 (dpd,  $J = 24.5, 12.2, 6.0$  Hz, 3H), 0.20 (t,  $^3J_{\text{HH}} = 7.3$  Hz, 1H).  $^{31}\text{P}\{^1\text{H}\}$  NMR (162 MHz,  $\text{C}_6\text{D}_6$ , 298 K)  $\delta$  (ppm) = 49.5 (s).

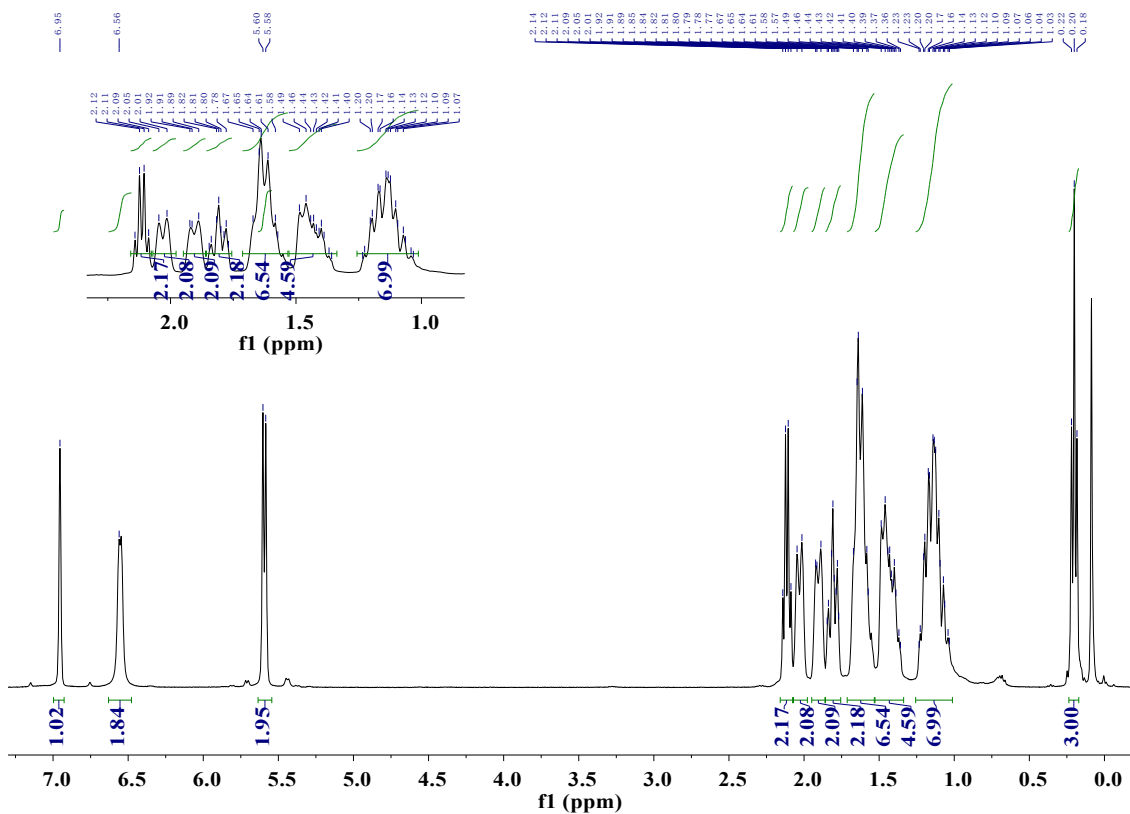

Figure S4.  $^1\text{H}$  NMR spectrum of PyAP-Cy (400 MHz,  $\text{C}_6\text{D}_6$ , 298 K)

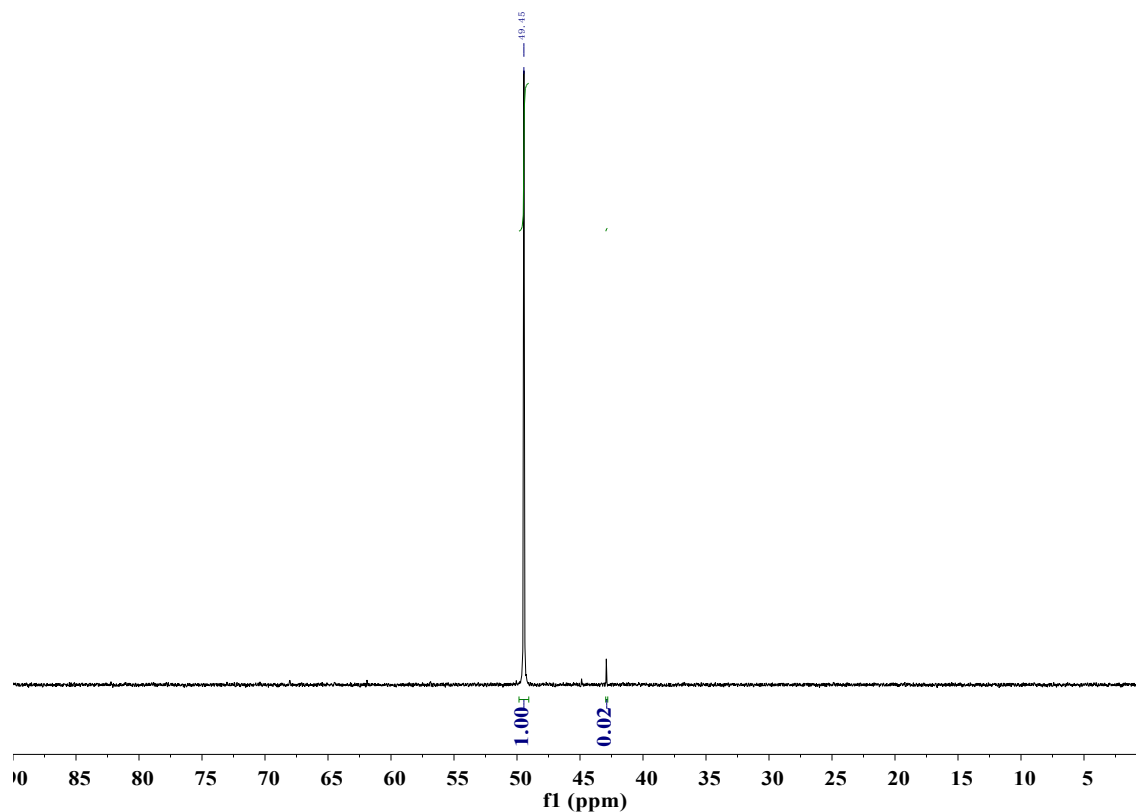

**Figure S5.**  $^{31}\text{P}\{^1\text{H}\}$  NMR spectrum of PyAP-Cy (162 MHz,  $\text{C}_6\text{D}_6$ , 298 K)

### Synthesis of PyAP-*i*Pr

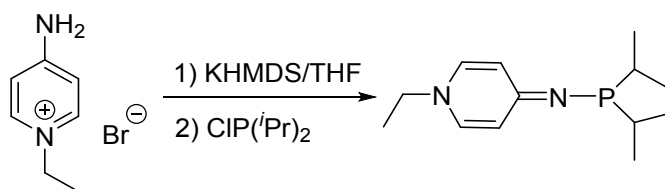

PyAP-*i*Pr was prepared and isolated as yellow solid using the same procedure as described for the preparation of P<sup>*i*</sup>Bu<sub>2</sub>. Pyridinium salt (1.625 g, 8 mmol, 1 equiv.), KHMDS (16 mL, 1 M in THF, 16 mmol, 2 equiv.) and ClP<sup>*i*</sup>Pr<sub>2</sub> (1.27 mL, 8 mmol, 1 equiv.) were suspended in THF (16 mL). After overnight stirring, all volatile compounds were removed *in vacuo* and the residue was extracted with n-hexane (3 × 30 mL) to give the corresponding phosphine as bright yellow solid in 81% yield (1.550 g, 6.5 mmol).

$^1\text{H}$  NMR (400 MHz,  $\text{C}_6\text{D}_6$ , 298 K)  $\delta$  (ppm) = 6.72 (d,  $^3J_{\text{HH}} = 6.0$  Hz, 2H, 2-H), 5.82 (d,  $^3J_{\text{HH}} = 7.3$  Hz, 2H, 3-H), 2.35 (q,  $^3J_{\text{HH}} = 7.2$  Hz, 2H,  $\text{CH}_2$ ), 2.08 (hept,  $^3J_{\text{HH}} = 7.0$  Hz, 2H,  $\text{CH}(\text{CH}_3)_2$ ), 1.30-1.40 (m, 12H,  $\text{CH}(\text{CH}_3)_2$ ), 0.42 (t,  $^3J_{\text{HH}} = 7.2$  Hz, 3H,  $\text{CH}_3$ ).  $^{31}\text{P}\{^1\text{H}\}$

NMR (162 MHz, C<sub>6</sub>D<sub>6</sub>, 298 K)  $\delta$  (ppm) = 56.3 (s).

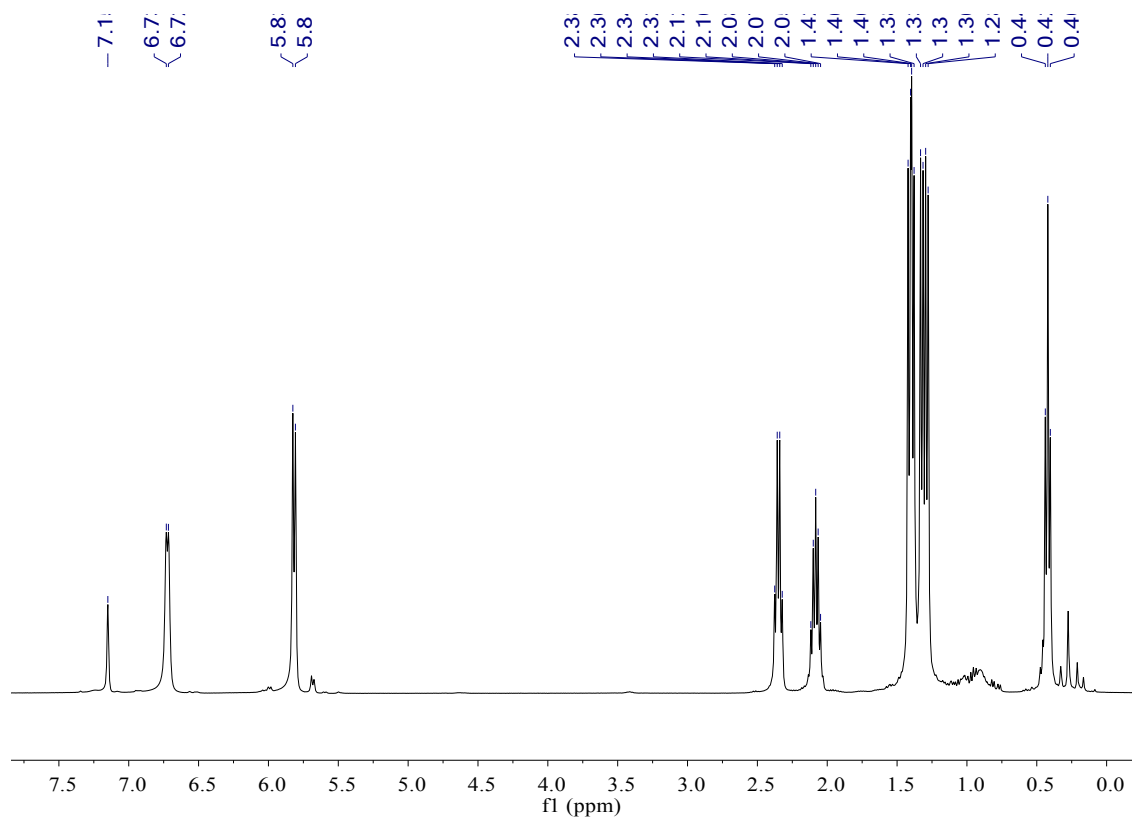

**Figure S6.** <sup>1</sup>H NMR spectrum of PyAP-*Pr* (400 MHz, C<sub>6</sub>D<sub>6</sub>, 298 K)



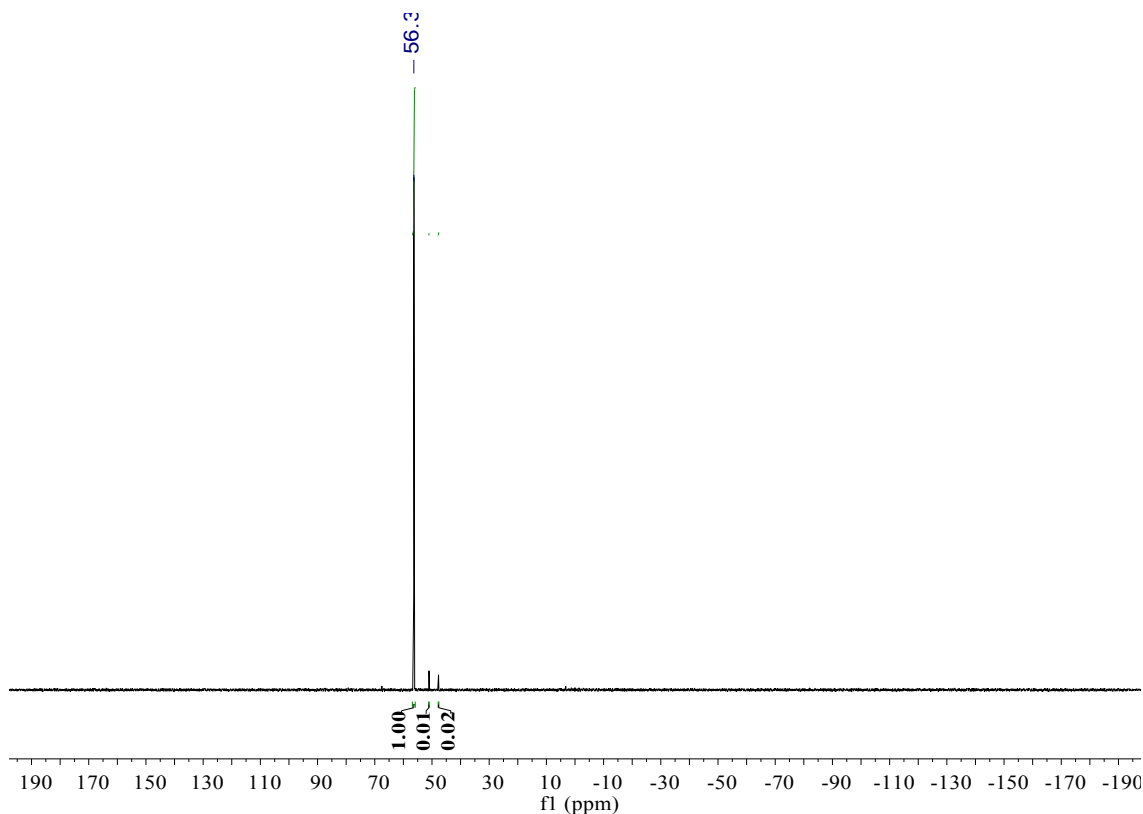

**Figure S7.**  $^{31}\text{P}\{^1\text{H}\}$  NMR spectrum of PyAP-*i*Pr (162 MHz,  $\text{C}_6\text{D}_6$ , 298 K)

### Synthesis of PyAP-Ph

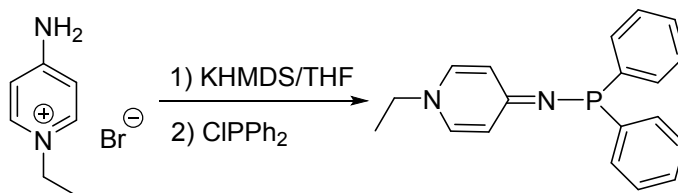

PyAP-Ph was prepared and isolated as yellow solid using the same procedure as described for the preparation of  $\text{P}^i\text{P}^i\text{Bu}_2$ . Pyridinium salt (1.015 g, 5 mmol, 1 equiv.), KHMDS (10 mL, 1 M in THF, 10 mmol, 2 equiv.) and  $\text{ClPPh}_2$  (1.44 mL, 5 mmol, 1 equiv.) were suspended in THF (10 mL). After overnight stirring, all volatile compounds were removed *in vacuo* and the residue was extracted with toluene ( $3 \times 30$  mL) and concentrated to 15 mL. The suspension was left in a  $-30^\circ\text{C}$  fridge to give the corresponding phosphine as bright yellow solid in 39.2% yield (0.60 g, 1.96 mmol).

$^1\text{H}$  NMR (400 MHz,  $\text{C}_6\text{D}_6$ , 298 K)  $\delta$  (ppm) = 8.07 (t,  $^3J_{\text{HH}} = 7.2$  Hz, 4H, *o*-Ph), 7.19 (t,

$^3J_{\text{HH}} = 7.4$  Hz, 4H, *m*-Ph), 7.06 (t,  $^3J_{\text{HH}} = 7.3$  Hz, 2H, *p*-Ph), 6.48 (d,  $^3J_{\text{HH}} = 7.2$  Hz, 2H, 2-H), 5.75 (d,  $^3J_{\text{HH}} = 7.1$  Hz, 2H, 3-H), 2.27 (q,  $^3J_{\text{HH}} = 7.3$  Hz, 2H, CH<sub>2</sub>), 0.34 (t,  $^3J_{\text{HH}} = 7.2$  Hz, 3H, CH<sub>3</sub>).

$^{13}\text{C}\{^1\text{H}\}$  NMR (100 MHz, C<sub>6</sub>D<sub>6</sub>, 298 K)  $\delta$  (ppm) = 163.70 (d,  $^2J_{\text{PC}} = 16.0$  Hz, C=N), 145.37 (d,  $^2J_{\text{PC}} = 14.0$  Hz, *o*-Ph<sub>C</sub>), 135.32 (d,  $^1J_{\text{PC}} = 3.0$  Hz, *i*-Ph<sub>C</sub>), 131.98 (d,  $^3J_{\text{PC}} = 19.9$  Hz, *m*-Ph<sub>C</sub>), 129.3 (s, *p*-Ph<sub>C</sub>), 116.7 (m, 3-C), 100.4 (s, 2-C), 49.8 (s, CH<sub>2</sub>), 15.3 (s, CH<sub>3</sub>).

$^{31}\text{P}\{^1\text{H}\}$  NMR (162 MHz, C<sub>6</sub>D<sub>6</sub>, 298 K)  $\delta$  (ppm) = 31.5 (s).

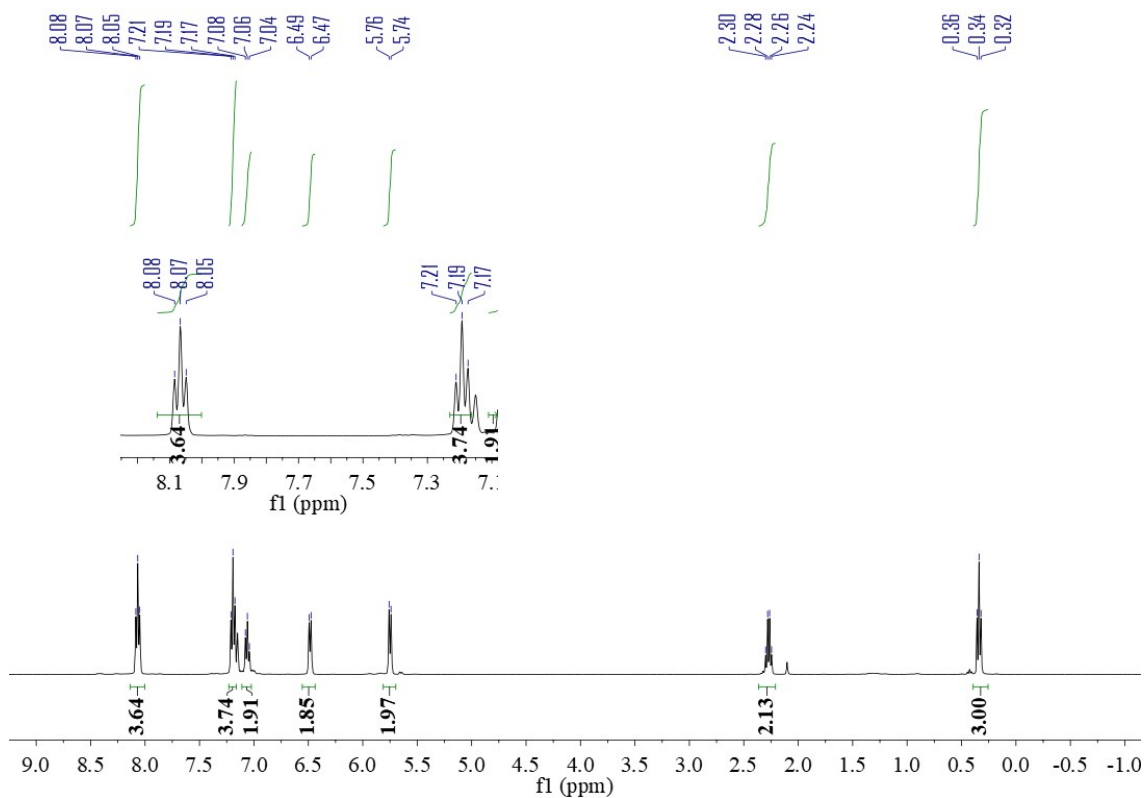

**Figure S8.**  $^1\text{H}$  NMR spectrum of PyAP-Ph (400 MHz, C<sub>6</sub>D<sub>6</sub>, 298 K)

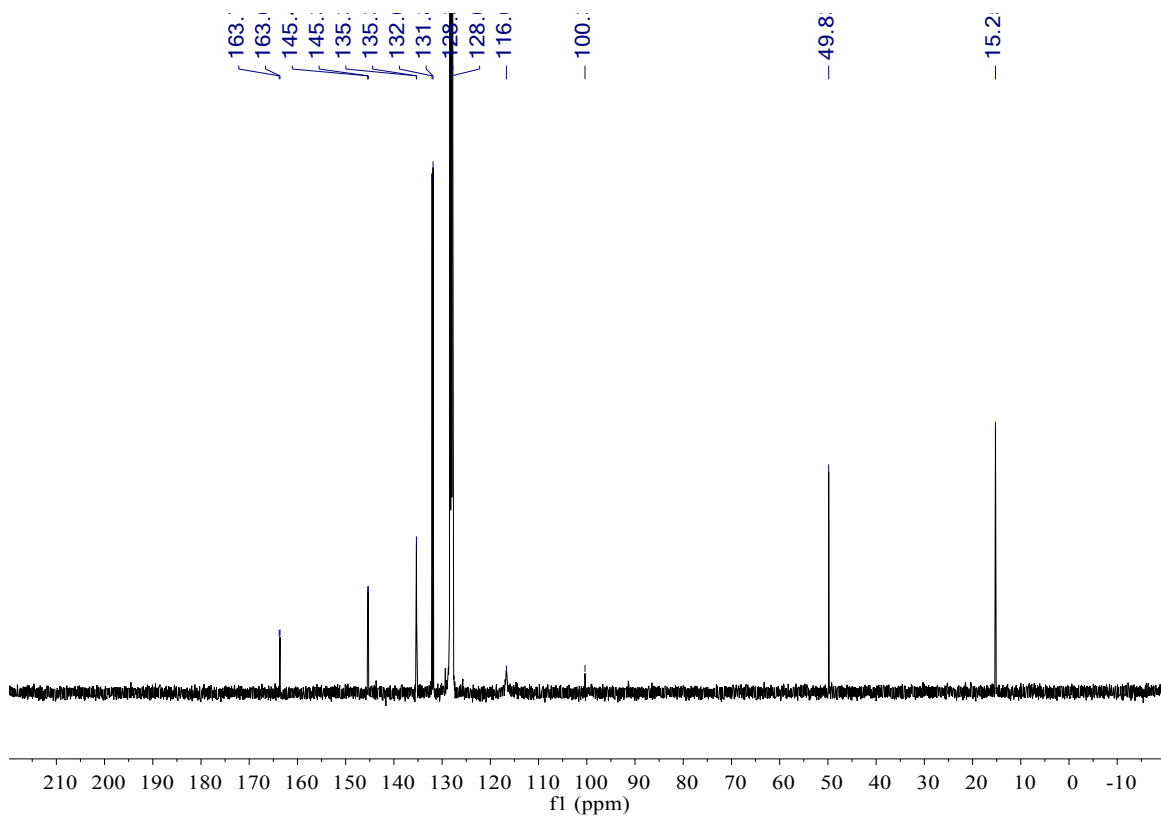

**Figure S9.**  $^{13}\text{C}\{^1\text{H}\}$  NMR spectrum of PyAP-Ph (100 MHz,  $\text{C}_6\text{D}_6$ , 298 K)

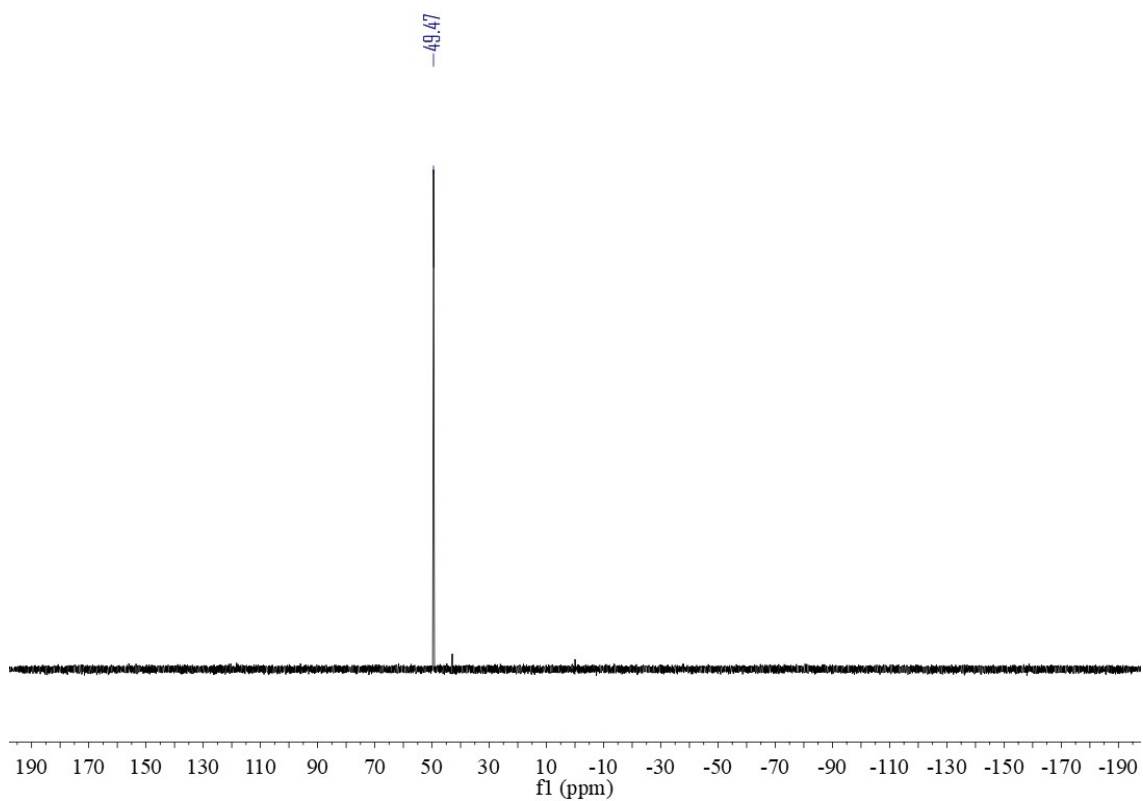

**Figure S10.**  $^{31}\text{P}\{^1\text{H}\}$  NMR spectrum of PyAP-Ph (162 MHz,  $\text{C}_6\text{D}_6$ , 298 K)

## 2 Stoichiometric NMR Reactions

### 2.1 Stoichiometric NMR Reaction of PyAP-*t*Bu with $\text{Al}(\text{C}_6\text{F}_5)_3$ in a 1:1 molar ratio

A NMR tube was charged with PyAP-*t*Bu (6.7 mg, 0.025 mmol) and 0.3 mL of  $\text{C}_6\text{D}_6$ . A solution of  $\text{Al}(\text{C}_6\text{F}_5)_3$  (14.4 mg, 0.025 mmol), 0.3 mL  $\text{C}_6\text{D}_6$  was added to this tube via pipette at ambient temperature, and the mixture was allowed to react for 5 min before analyzed by NMR spectroscopy.

Associated species : dissociated species molar ratio = 10:1, which was assigned by  $^{31}\text{P}\{^1\text{H}\}$  NMR spectroscopy.

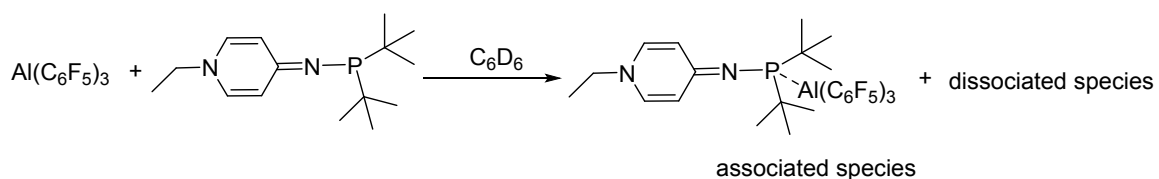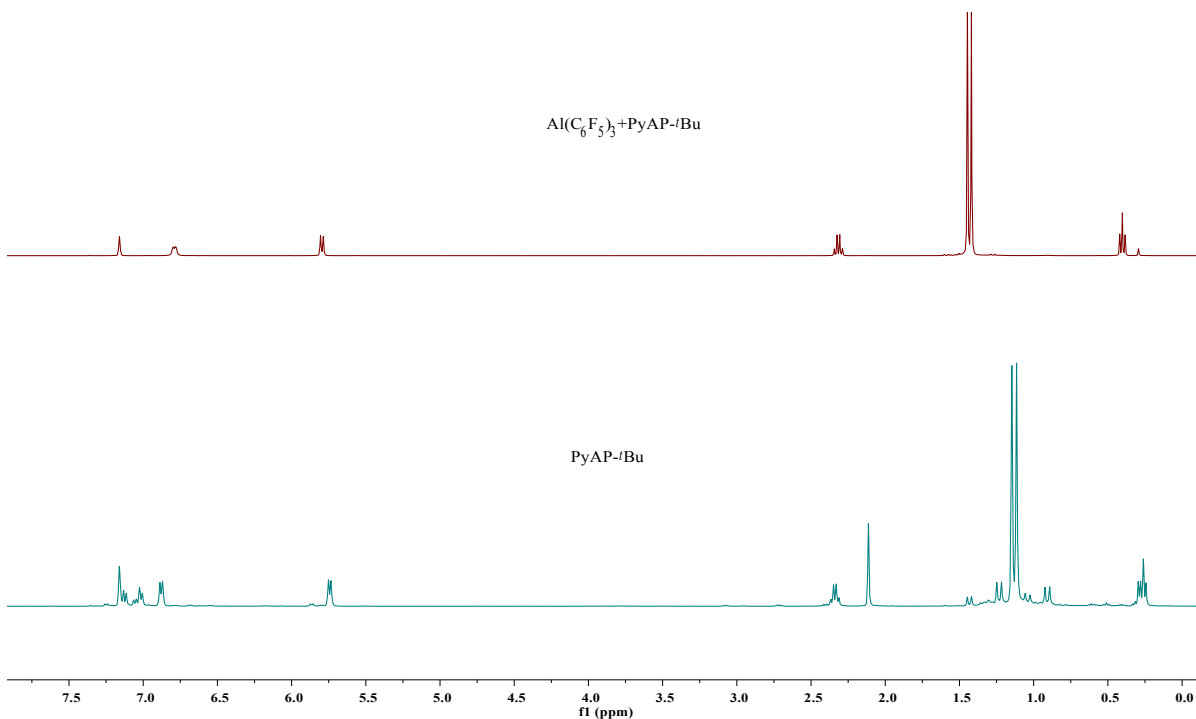

**Figure S11.**  $^1\text{H}$  NMR spectrum for reaction of PyAP-*t*Bu with  $\text{Al}(\text{C}_6\text{F}_5)_3$  (400 MHz,  $\text{C}_6\text{D}_6$ , 298 K)

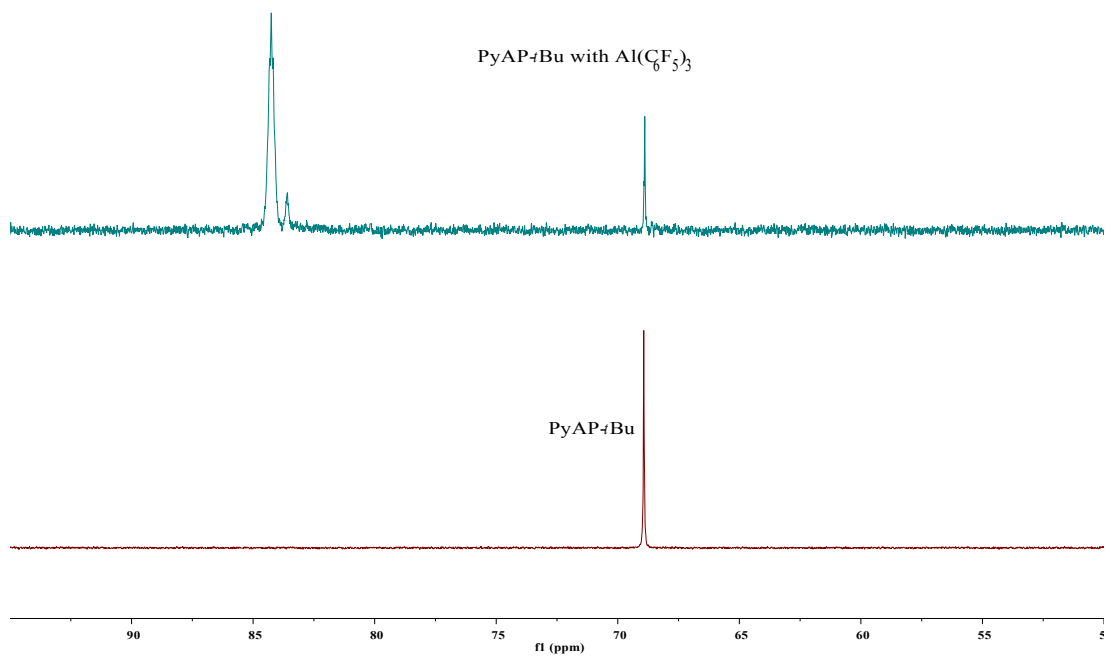

**Figure S12.** <sup>31</sup>P{<sup>1</sup>H} NMR spectrum for reaction of PyAP-tBu with Al(C<sub>6</sub>F<sub>5</sub>)<sub>3</sub> (162 MHz, C<sub>6</sub>D<sub>6</sub>, 298 K)

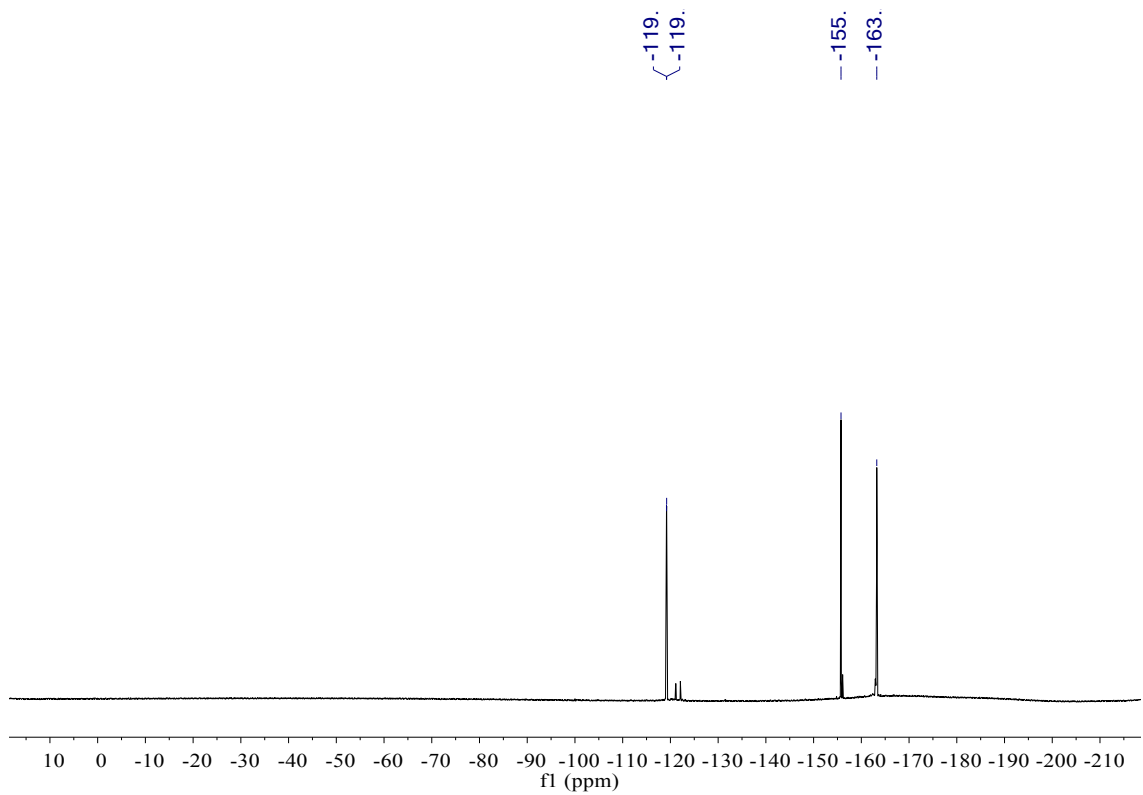

**Figure S13.**  $^{19}\text{F}$   $\{^1\text{H}\}$  NMR spectrum for reaction of PyAP-*t*Bu with  $\text{Al}(\text{C}_6\text{F}_5)_3$  (376 MHz,  $\text{C}_6\text{D}_6$ , 298 K)

## 2.2 Stoichiometric NMR Reaction of PyAP-Cy with $^i\text{BuAl}(\text{BHT})_2$ in a 1:1 molar ratio

A NMR tube was charged with PyAP-Cy (7.6 mg, 0.024 mmol) and 0.3 mL of  $\text{C}_6\text{D}_6$ . A solution of  $^i\text{BuAl}(\text{BHT})_2$  (12.5 mg, 0.024 mmol), 0.3 mL  $\text{C}_6\text{D}_6$  was added to this tube via pipette at ambient temperature, and the mixture was allowed to react for 5 min before analyzed by NMR spectroscopy.

Formation of FLP was indicated by  $^{31}\text{P}\{^1\text{H}\}$  NMR spectroscopy.

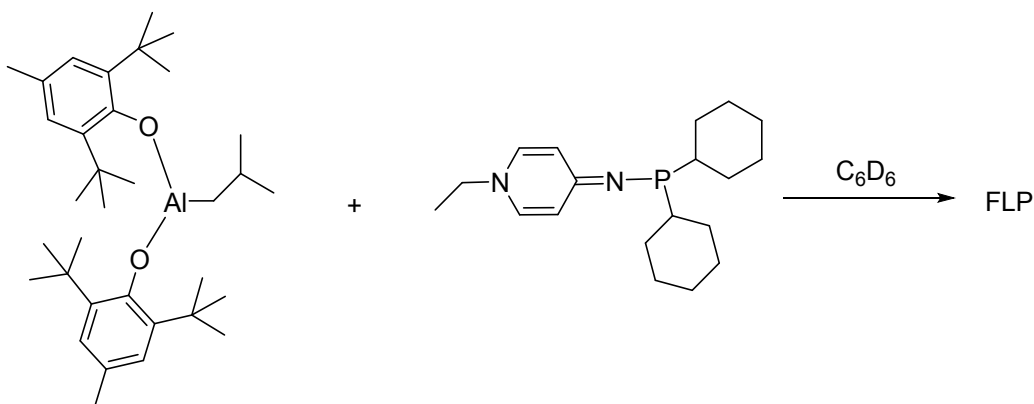

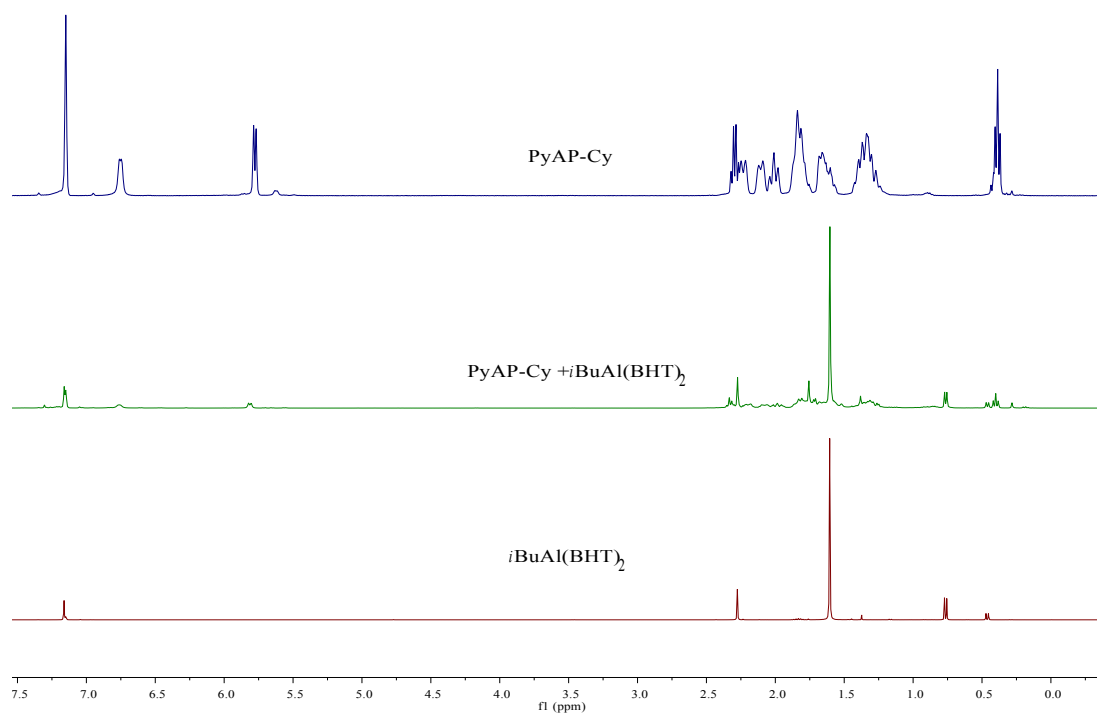

**Figure S14.**  $^1\text{H}$  NMR spectrum for reaction of PyAP-Cy with  $i\text{BuAl}(\text{BHT})_2$  (400 MHz,  $\text{C}_6\text{D}_6$ , 298 K)

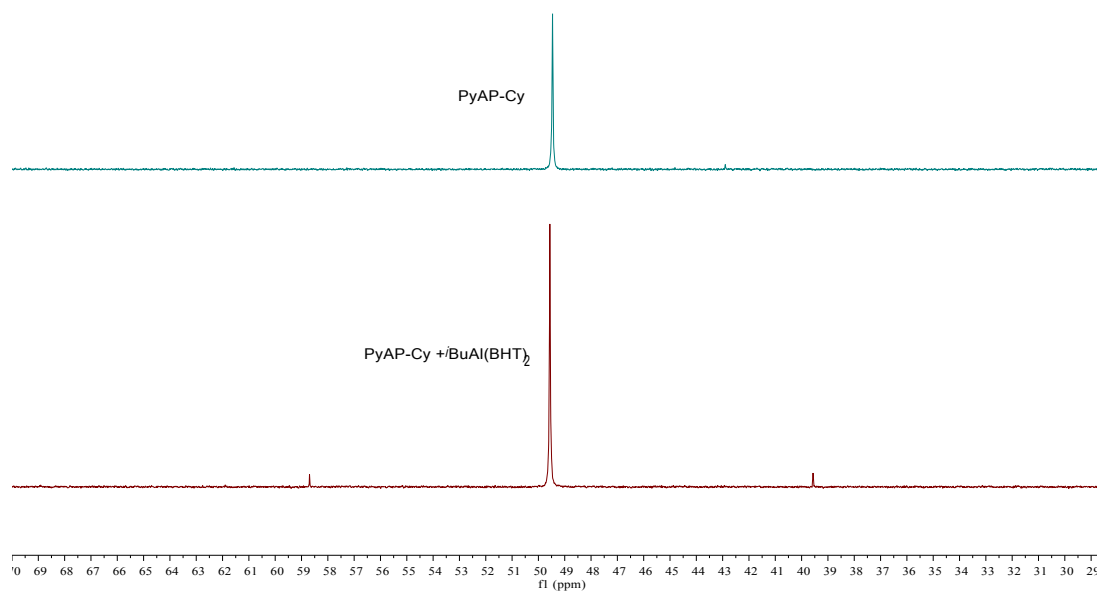

**Figure S15.**  $^{31}\text{P}\{^1\text{H}\}$  NMR spectrum for reaction of PyAP-Cy with  $i\text{BuAl}(\text{BHT})_2$  (162

MHz, C<sub>6</sub>D<sub>6</sub>, 298 K)

### 2.3 Stoichiometric NMR Reaction of PyAP-*t*Bu with *i*BuAl(BHT)<sub>2</sub> in a 1:1 molar ratio

A NMR tube was charged with PyAP-*t*Bu (6.4 mg, 0.024 mmol) and 0.3 mL of C<sub>6</sub>D<sub>6</sub>. A solution of *i*BuAl(BHT)<sub>2</sub> (12.5 mg, 0.024 mmol), 0.3 mL C<sub>6</sub>D<sub>6</sub> was added to this tube via pipette at ambient temperature, and the mixture was allowed to react for 5 min before analyzed by NMR spectroscopy. **PyAP-*t*Bu.**

Formation of FLP was indicated by <sup>31</sup>P{<sup>1</sup>H} NMR spectroscopy.

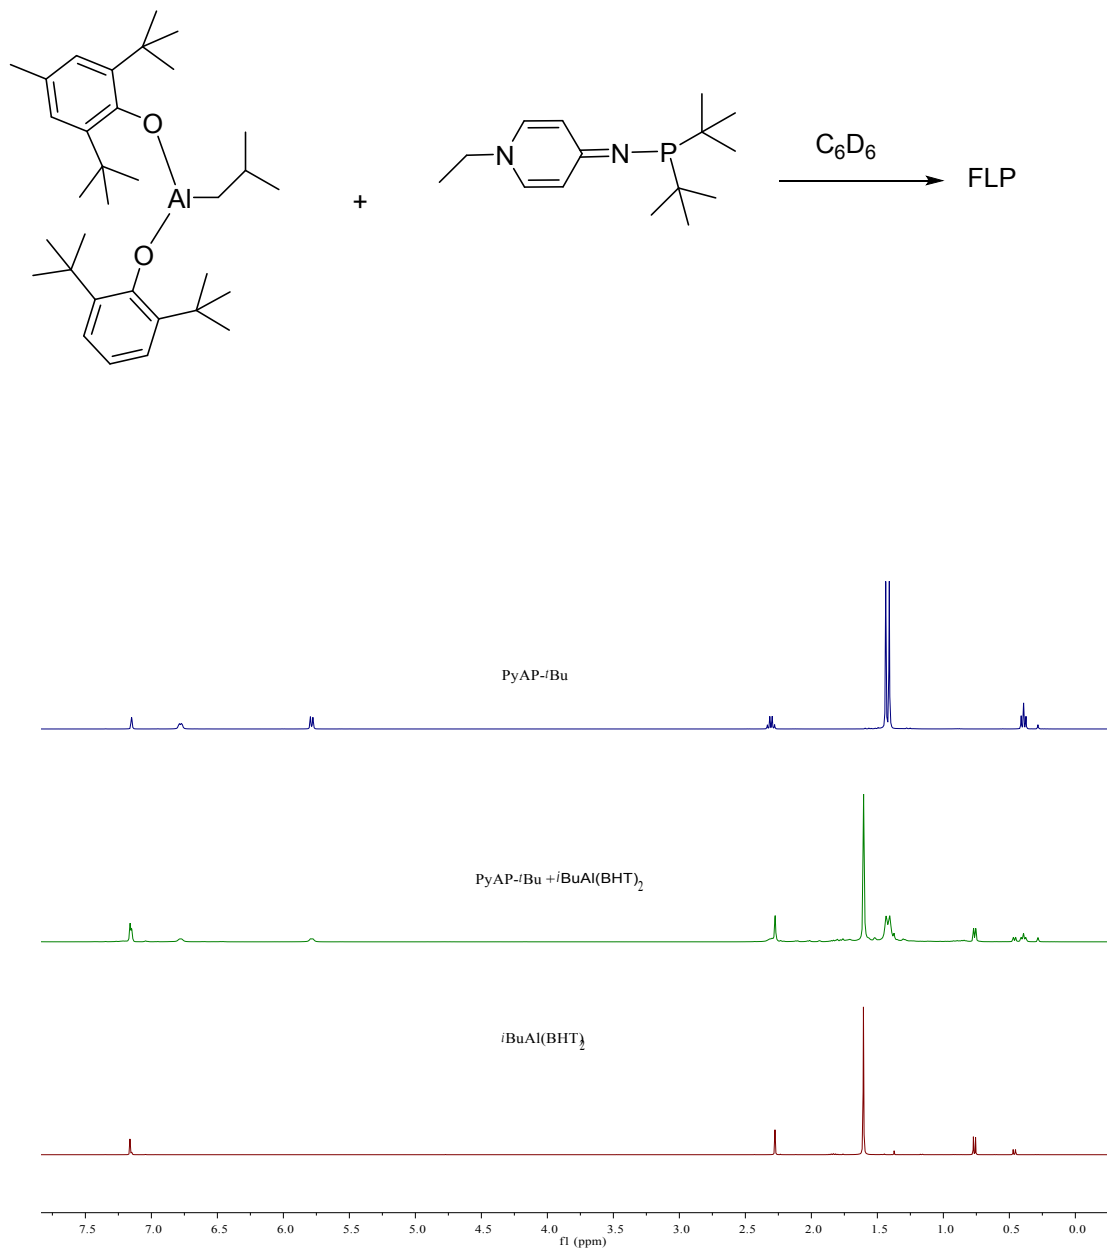



**Figure S16.**  $^1\text{H}$  NMR spectrum for reaction of PyAP- $^i\text{Bu}$  with  $^i\text{BuAl}(\text{BHT})_2$  (400 MHz,  $\text{C}_6\text{D}_6$ , 298 K)

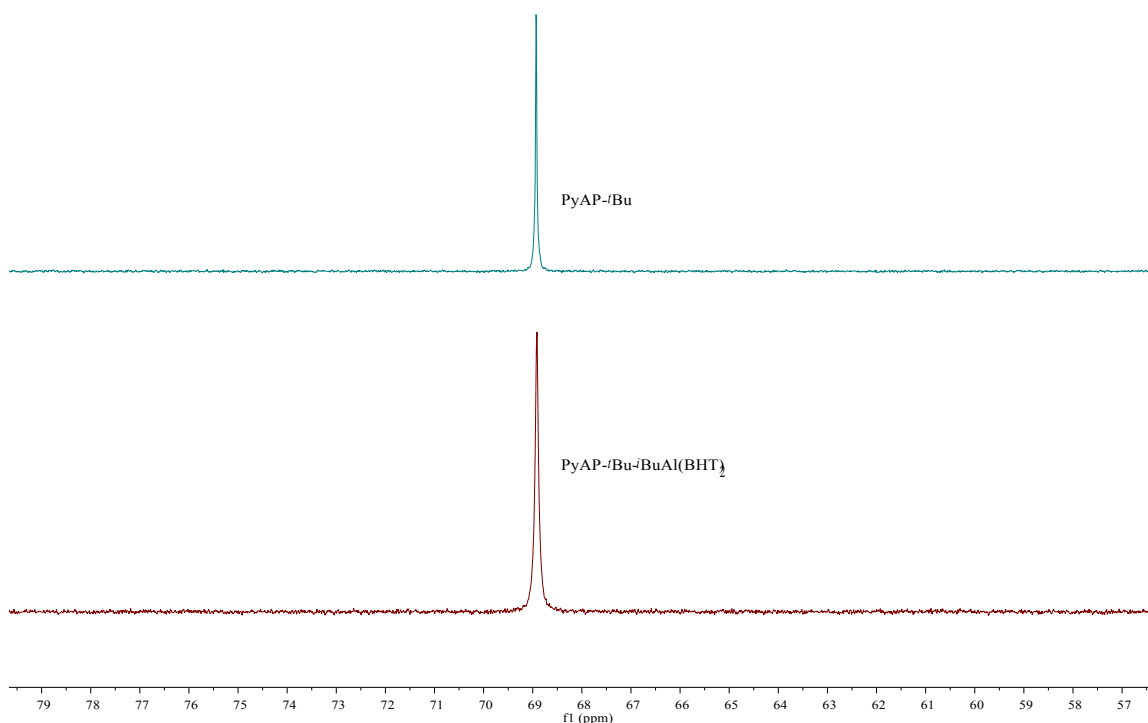

**Figure S17.**  $^{31}\text{P}\{^1\text{H}\}$  NMR spectrum for reaction of PyAP- $^i\text{Bu}$  with  $^i\text{BuAl}(\text{BHT})_2$  (162 MHz,  $\text{C}_6\text{D}_6$ , 298 K)

#### 2.4 Stoichiometric NMR Reaction of PyAP- $^i\text{Pr}$ with $^i\text{BuAl}(\text{BHT})_2$ in a 1:1 molar ratio

A NMR tube was charged with PyAP- $^i\text{Pr}$  (7.1 mg, 0.03 mmol) and 0.3 mL of  $\text{C}_6\text{D}_6$ . A solution of  $^i\text{BuAl}(\text{BHT})_2$  (15.7 mg, 0.03 mmol), 0.3 mL  $\text{C}_6\text{D}_6$  was added to this tube via pipette at ambient temperature, and the mixture was allowed to react for 5 min before analyzed by NMR spectroscopy.

Formation of FLP was indicated by  $^{31}\text{P}\{^1\text{H}\}$  NMR spectroscopy.

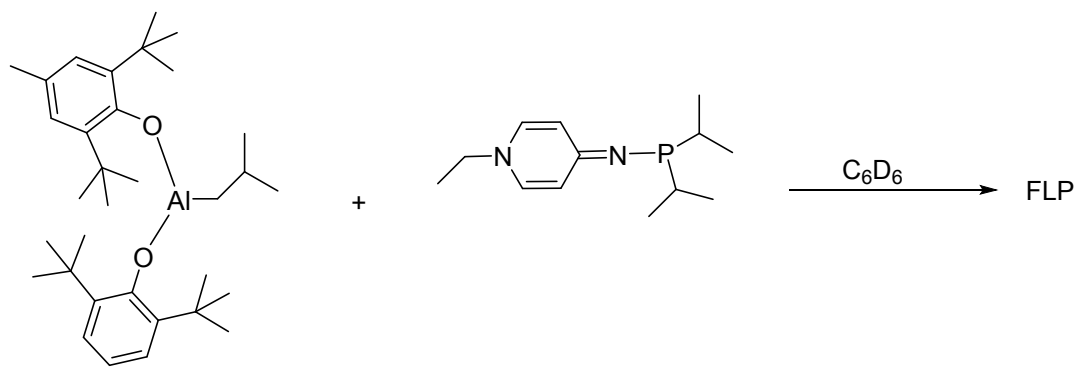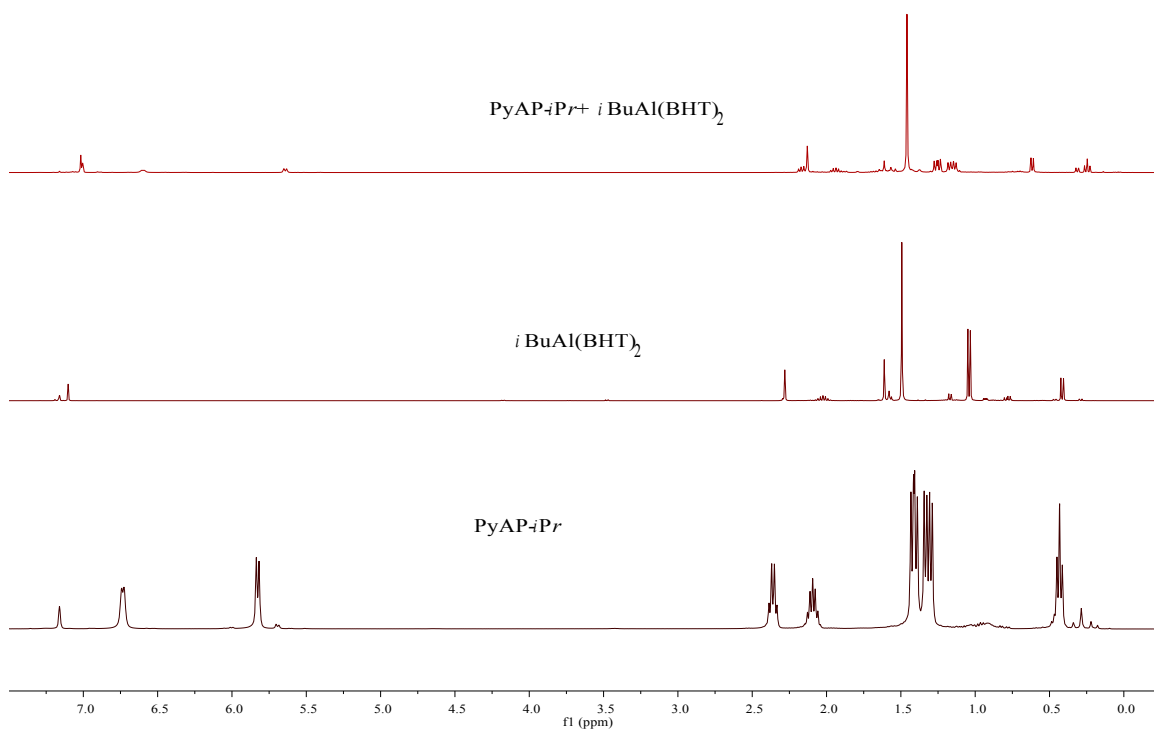

**Figure S18.**  $^1\text{H}$  NMR spectrum for reaction of  $\text{PyAP-}i\text{Pr}$  with  $i\text{BuAl}(\text{BHT})_2$  (400 MHz,  $\text{C}_6\text{D}_6$ , 298 K)

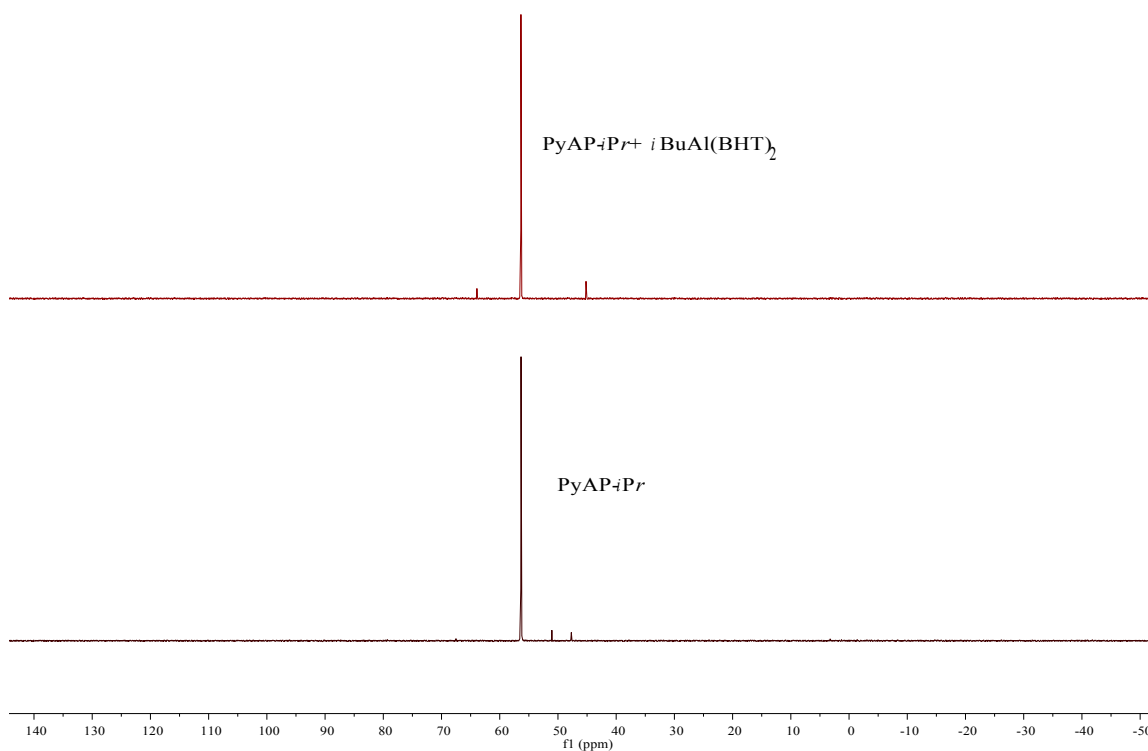

**Figure S19.**  $^{31}\text{P}\{^1\text{H}\}$  NMR spectrum for reaction of PyAP-*iPr* with *i*BuAl(BHT)<sub>2</sub> (162 MHz, C<sub>6</sub>D<sub>6</sub>, 298 K)

### 2.5 Stoichiometric NMR Reaction of PyAP-Ph with *i*BuAl(BHT)<sub>2</sub> in a 1:1 molar ratio

A NMR tube was charged with PyAP-Ph (9.2 mg, 0.03 mmol) and 0.3 mL of C<sub>6</sub>D<sub>6</sub>. A solution of *i*BuAl(BHT)<sub>2</sub> (15.7 mg, 0.03 mmol), 0.3 mL C<sub>6</sub>D<sub>6</sub> was added to this tube via pipette at ambient temperature, and the mixture was allowed to react for 5 min before analyzed by NMR spectroscopy.

Free dissociated species and unidentified species mixture formed, which were indicated by  $^{31}\text{P}\{^1\text{H}\}$  NMR spectroscopy.

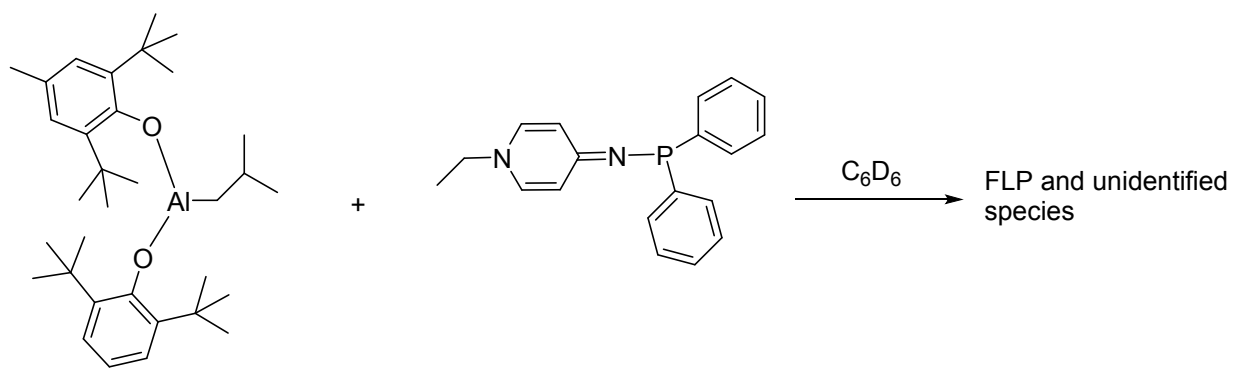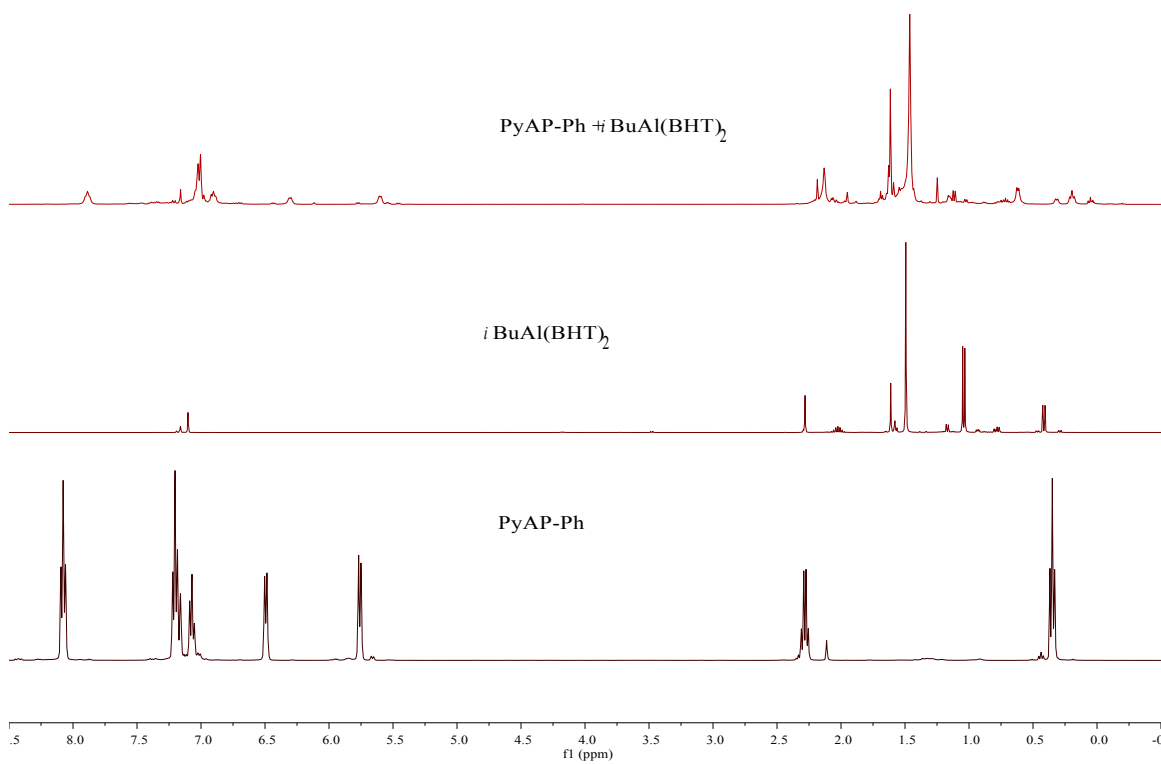

**Figure S20.** <sup>1</sup>H NMR spectrum for reaction of PyAP-Ph with *i*BuAl(BHT)<sub>2</sub> (400 MHz, C<sub>6</sub>D<sub>6</sub>, 298 K)

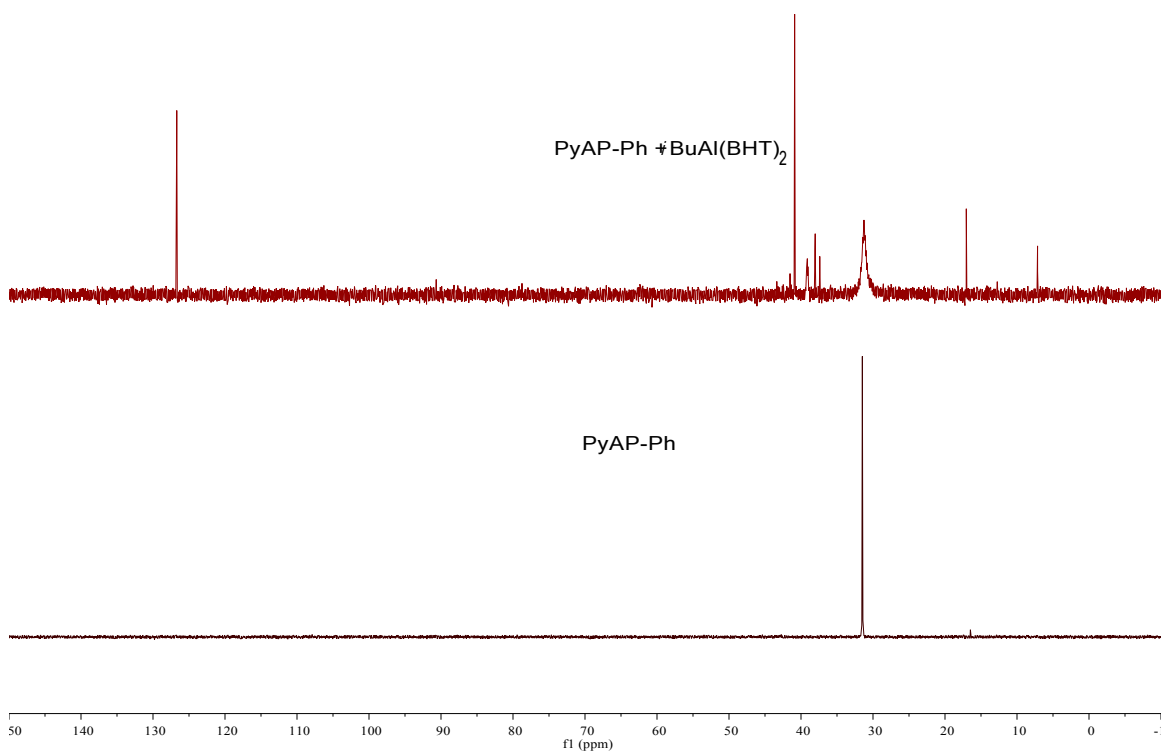

**Figure S21.**  $^{31}\text{P}\{^1\text{H}\}$  NMR spectrum for reaction of PyAP-Ph with  $t\text{BuAl}(\text{BHT})_2$  (162 MHz,  $\text{C}_6\text{D}_6$ , 298 K)

## 2.6 Stoichiometric NMR Reaction of PyAP-Cy with $\text{MeAl}(\text{BHT})_2$ in a 1:1 molar ratio

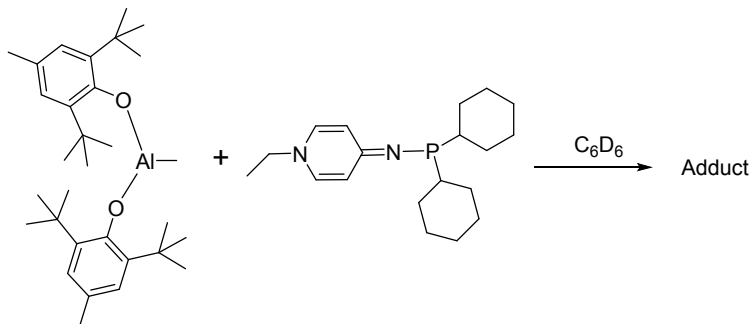

A NMR tube was charged with PyAP-Cy (9.6 mg, 0.03 mmol) and 0.3 mL of  $\text{C}_6\text{D}_6$ . A solution of  $\text{MeAl}(\text{BHT})_2$  (14 mg, 0.03 mmol), 0.3 mL  $\text{C}_6\text{D}_6$  was added to this tube via pipette at ambient temperature, and the mixture was allowed to react for 5 min before analyzed by NMR spectroscopy.

Associated species and dissociated species were formed, which were indicated by  $^{31}\text{P}\{^1\text{H}\}$  NMR spectroscopy. The molar ratio of associated species to FLP is 2.5/1.

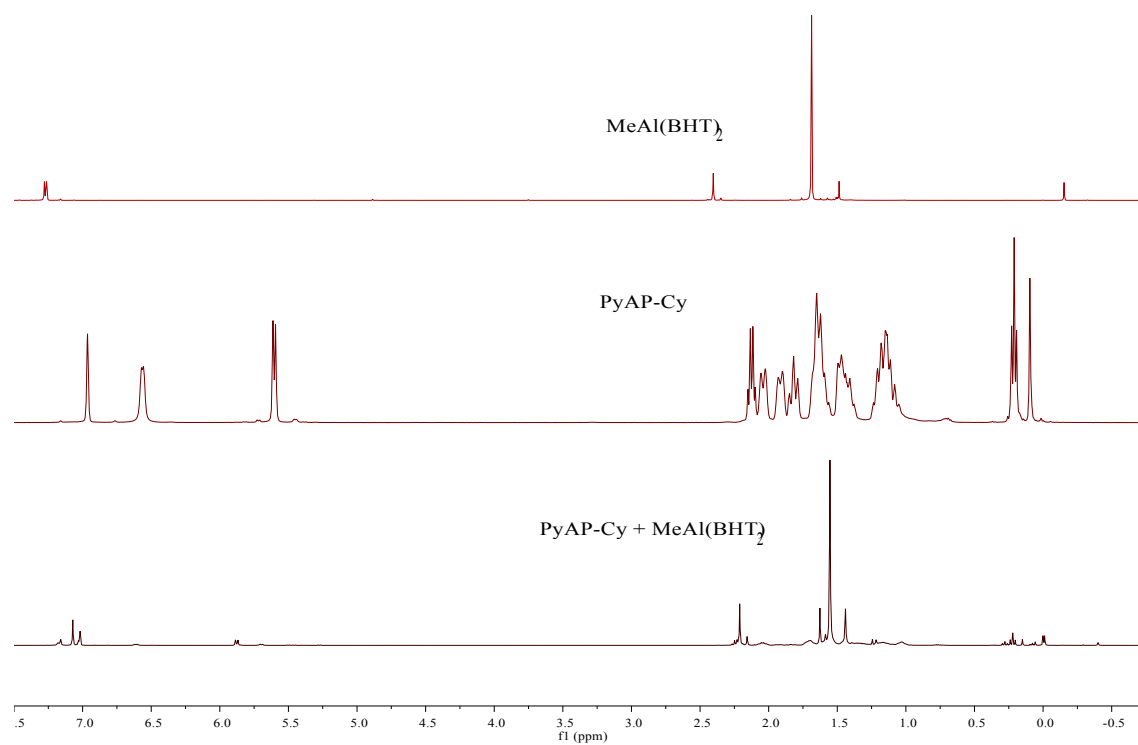

**Figure S22.**  $^1\text{H}$  NMR spectrum for reaction of  $\text{PyAP-Cy}$  with  $\text{MeAl(BHT)}_2$  (400 MHz,  $\text{C}_6\text{D}_6$ , 298 K)

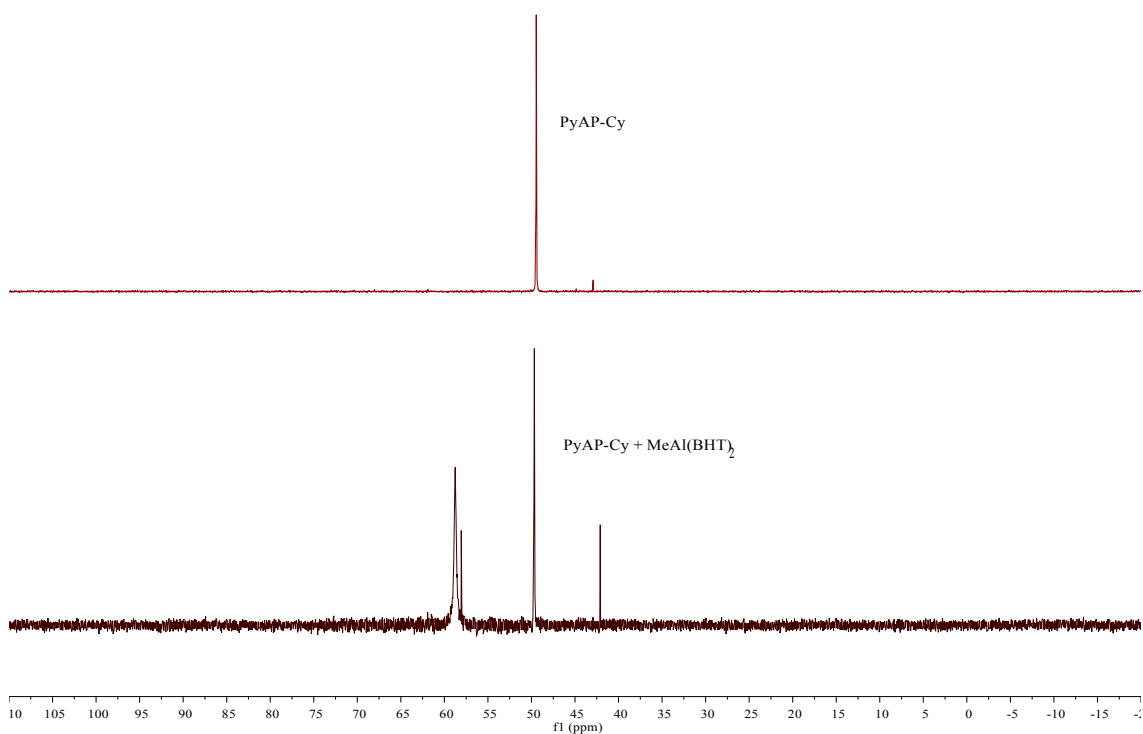

**Figure S23.**  $^{31}\text{P}\{^1\text{H}\}$  NMR spectrum for reaction of PyAP-Cy with  $\text{MeAl}(\text{BHT})_2$  (162 MHz,  $\text{C}_6\text{D}_6$ , 298 K)

### 2.7 Stoichiometric NMR Reaction of PyAP-*t*Bu with $\text{MeAl}(\text{BHT})_2$ in a 1:1 molar ratio

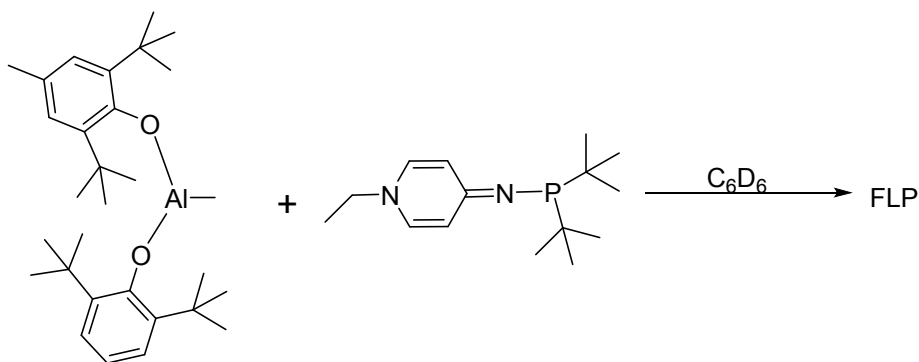

A NMR tube was charged with PyAP-*t*Bu (8 mg, 0.03 mmol) and 0.3 mL of  $\text{C}_6\text{D}_6$ . A solution of  $\text{MeAl}(\text{BHT})_2$  (14 mg, 0.03 mmol), 0.3 mL  $\text{C}_6\text{D}_6$  was added to this tube via pipette at ambient temperature, and the mixture was allowed to react for 5 min before analyzed by NMR spectroscopy.

Formation of FLP was indicated by  $^{31}\text{P}\{^1\text{H}\}$  NMR spectroscopy.

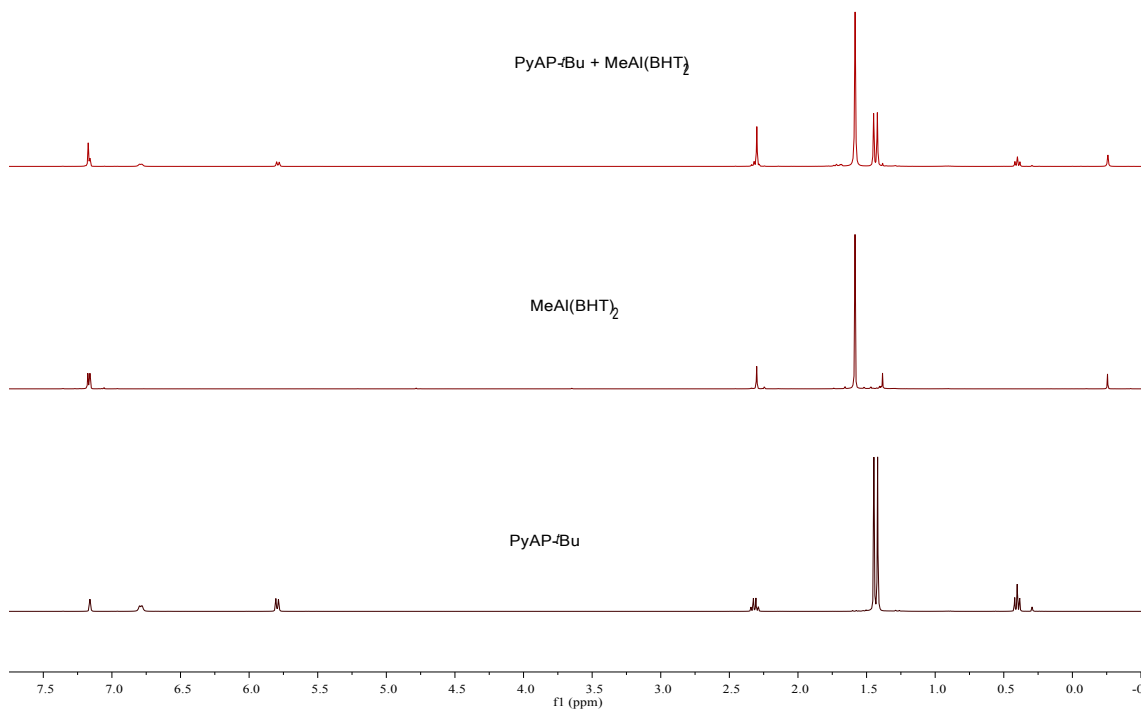

**Figure S24.**  $^1\text{H}$  NMR spectrum for reaction of PyAP-tBu with  $\text{MeAl(BHT)}_2$  (400 MHz,  $\text{C}_6\text{D}_6$ , 298 K)



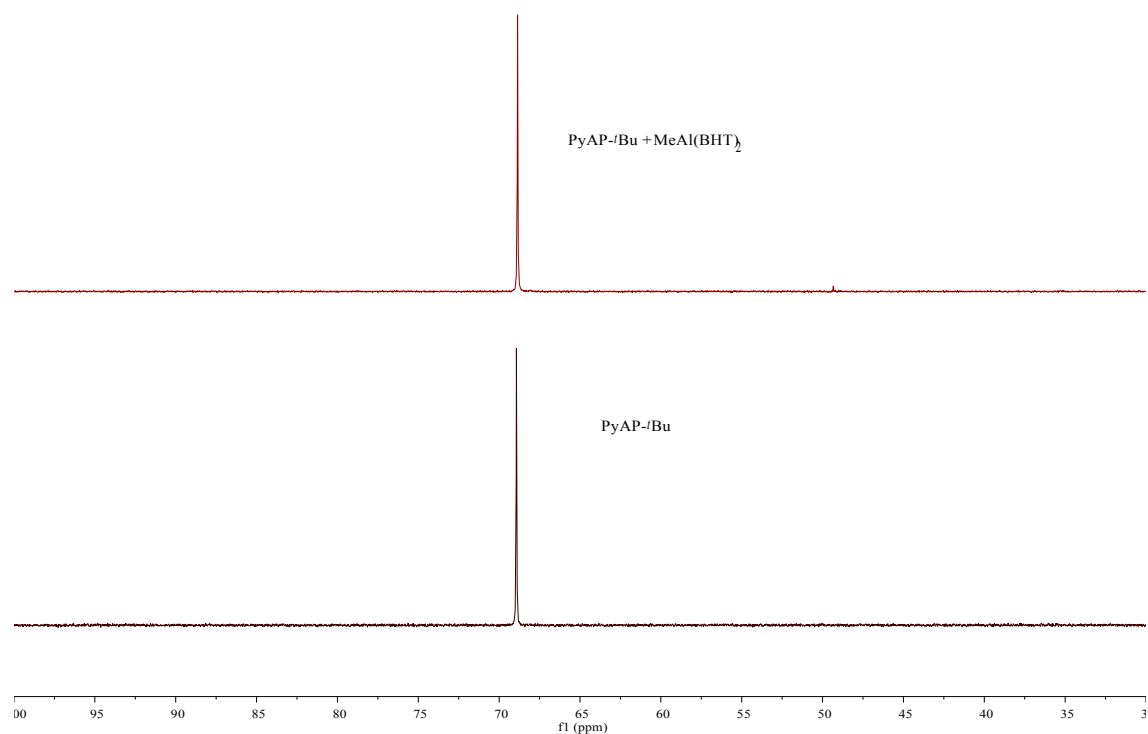

**Figure S25.**  $^{31}\text{P}\{^1\text{H}\}$  NMR spectrum for reaction of PyAP-*i*Bu with  $\text{MeAl}(\text{BHT})_2$  (162 MHz,  $\text{C}_6\text{D}_6$ , 298 K)

### 2.8 Stoichiometric NMR Reaction of PyAP-*i*Pr with $\text{MeAl}(\text{BHT})_2$ in a 1:1 molar ratio

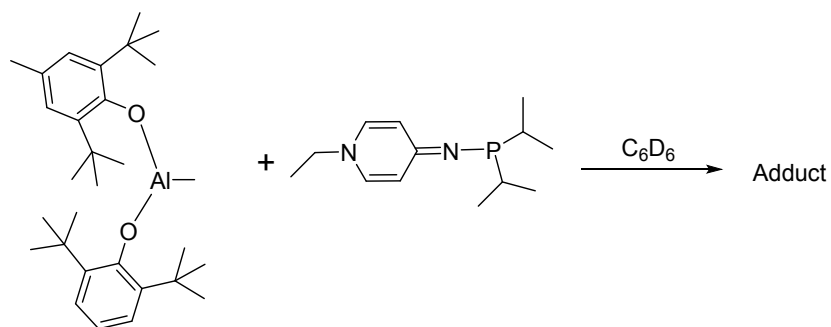

A NMR tube was charged with PyAP-*i*Pr (7.1 mg, 0.03 mmol) and 0.3 mL of  $\text{C}_6\text{D}_6$ . A solution of  $\text{MeAl}(\text{BHT})_2$  (14 mg, 0.03 mmol), 0.3 mL  $\text{C}_6\text{D}_6$  was added to this tube via pipette at ambient temperature, and the mixture was allowed to react for 5 min before analyzed by NMR spectroscopy.

Associated species and dissociated species were formed, which were indicated by  $^{31}\text{P}\{^1\text{H}\}$  NMR spectroscopy. The molar ratio of adduct to free FLP is 1/0.4.

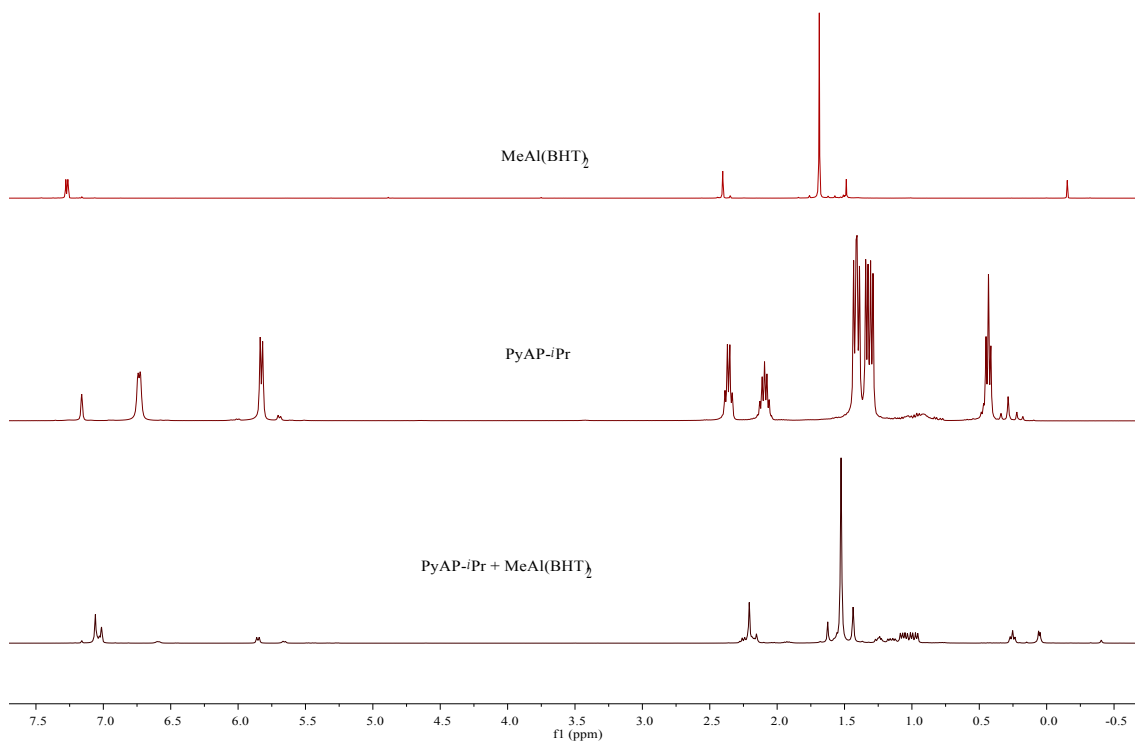

**Figure S26.**  $^1\text{H}$  NMR spectrum for reaction of  $\text{PyAP-}i\text{Pr}$  with  $\text{MeAl}(\text{BHT})_2$  (400 MHz,  $\text{C}_6\text{D}_6$ , 298 K)

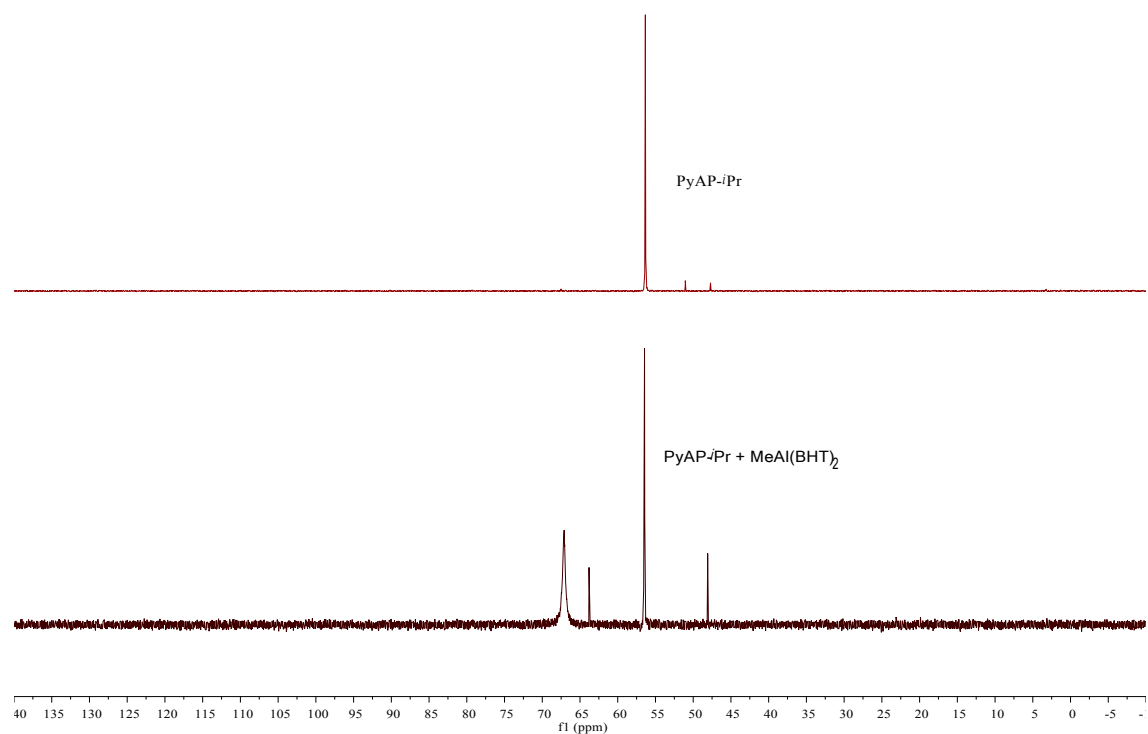

**Figure S27.**  $^{31}\text{P}\{^1\text{H}\}$  NMR spectrum for reaction of PyAP-*i*Pr with MeAl(BHT)<sub>2</sub> (162 MHz, C<sub>6</sub>D<sub>6</sub>, 298 K)

### 2.9 Stoichiometric NMR Reaction of PyAP-Ph with MeAl(BHT)<sub>2</sub> in a 1:1 molar ratio

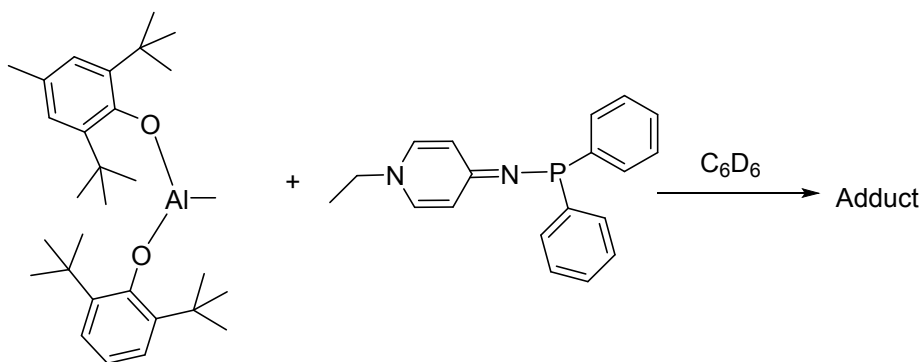

A NMR tube was charged with PyAP-Ph (9.2 mg, 0.03 mmol) and 0.3 mL of C<sub>6</sub>D<sub>6</sub>. A solution of MeAl(BHT)<sub>2</sub> (14 mg, 0.03 mmol), 0.3 mL C<sub>6</sub>D<sub>6</sub> was added to this tube via pipette at ambient temperature, and the mixture was allowed to react for 5 min before analyzed by NMR spectroscopy.

Formation of associated species was indicated by  $^{31}\text{P}\{^1\text{H}\}$  NMR spectroscopy.

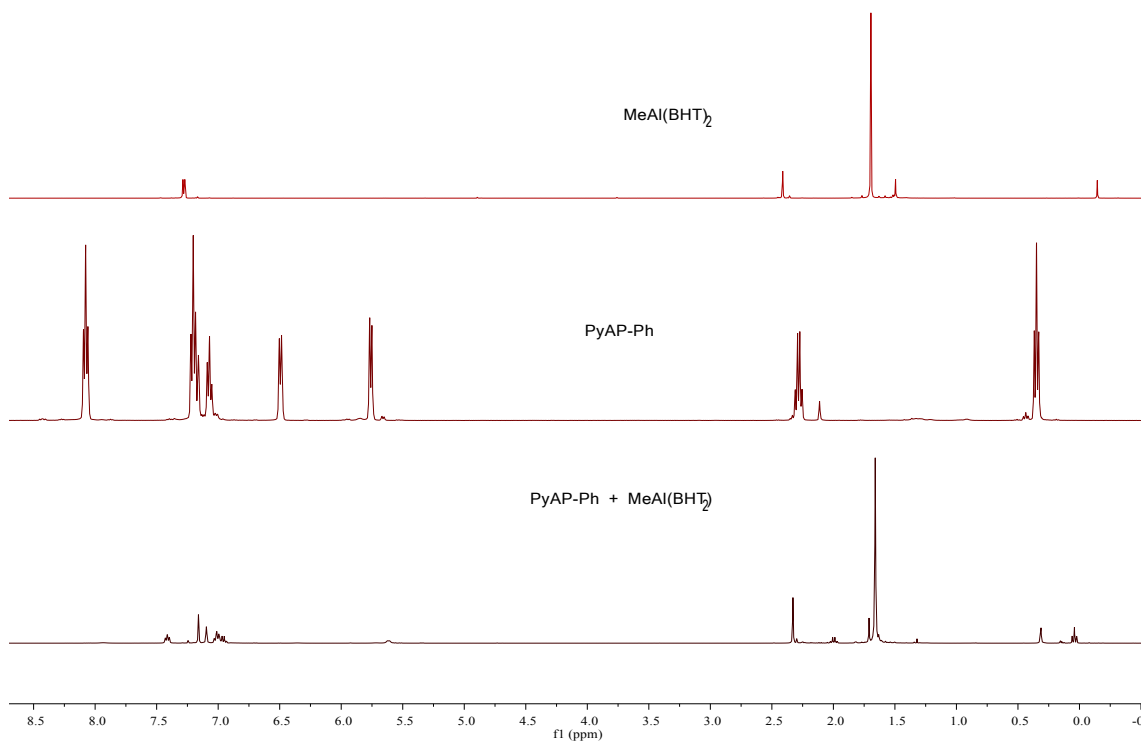

**Figure S28.**  $^1\text{H}$  NMR spectrum for reaction of  $\text{PyAP-Ph}$  with  $\text{MeAl}(\text{BHT})_2$  (400 MHz,  $\text{C}_6\text{D}_6$ , 298 K)

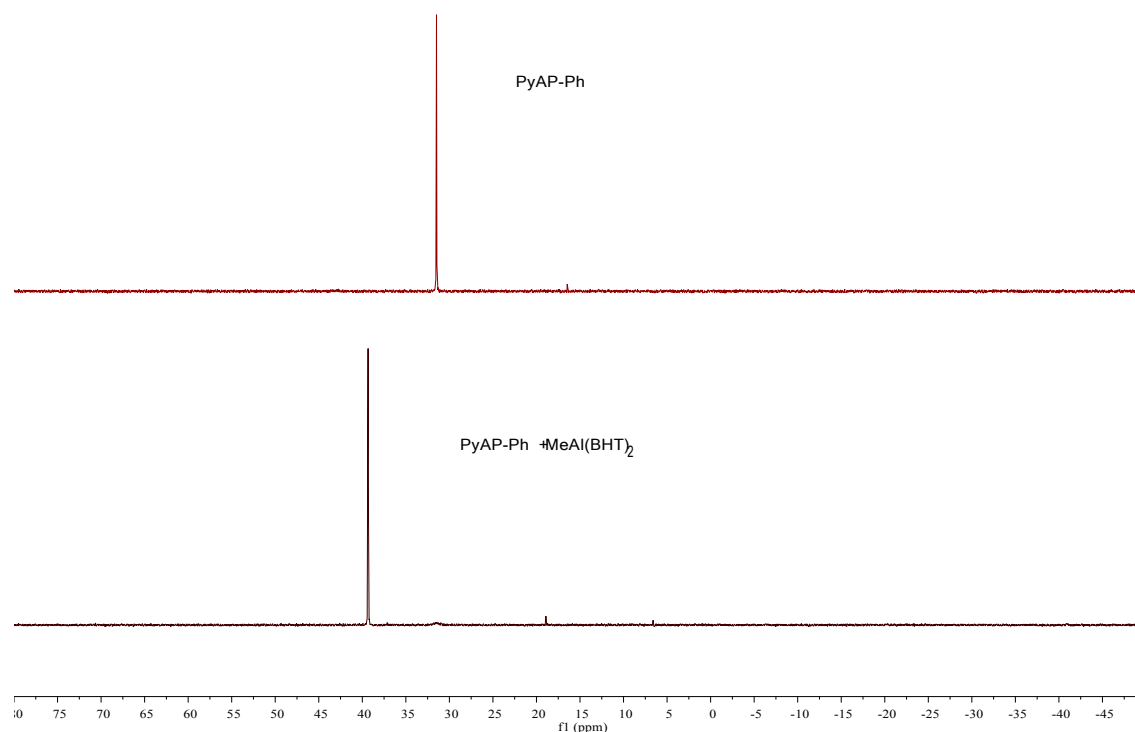

**Figure S29.**  $^{31}\text{P}\{^1\text{H}\}$  NMR spectrum for reaction of PyAP-Ph with  $\text{MeAl}(\text{BHT})_2$  (162 MHz,  $\text{C}_6\text{D}_6$ , 298 K)

### 2.10 Stoichiometric NMR Reaction of PyAP-*t*Bu with $\text{Al}(\text{C}_6\text{F}_5)_3 \cdot \text{MMA}$ in a 1:1 molar ratio

In an argon-filled glovebox, a NMR tube was charged with 10.7 mg (0.04 mmol) of PyAP-*t*Bu and 0.3 mL of  $\text{C}_6\text{D}_6$ . A 0.3 mL of  $\text{C}_6\text{D}_6$  solution of  $\text{Al}(\text{C}_6\text{F}_5)_3$  (22.9 mg, 0.04 mmol) and 4.2  $\mu\text{L}$  MMA (0.04 mmol) were slowly added to this tube via pipet at room temperature. The mixture was allowed to react for 5 min at room temperature before the NMR spectra were recorded. Zwitterionic enolaluminate was generated as two isomers (E/Z = 9:1). Only the major isomer was analyzed.

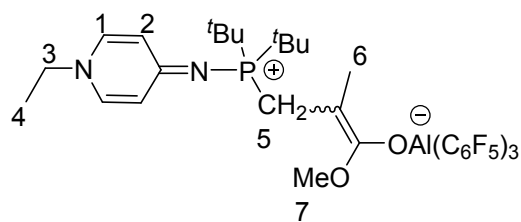

$^1\text{H}$  NMR (400 MHz,  $\text{C}_6\text{D}_6$ , 298 K)  $\delta$  (ppm) = 6.20 (m, 4H, 1-H, 2-H), 3.45 (s, 3H, 7-H), 2.56 (d,  $^2J_{\text{PH}} = 7.0$  Hz, 2H, 5-H), 2.49 (q,  $^3J_{\text{HH}} = 7.3$  Hz, 2H, 3-H), 1.43 (s, 3H, 6-H), 0.74

(d,  $^3J_{PH} = 14.2$  Hz, 18H,  $t$ -Bu), 0.38 (t,  $^3J_{HH} = 7.3$  Hz, 3H, 4-H).  $^{31}P$  { $^1H$ } NMR (162 MHz,  $C_6D_6$ , 298 K)  $\delta$  (ppm) = 45.9 (s).

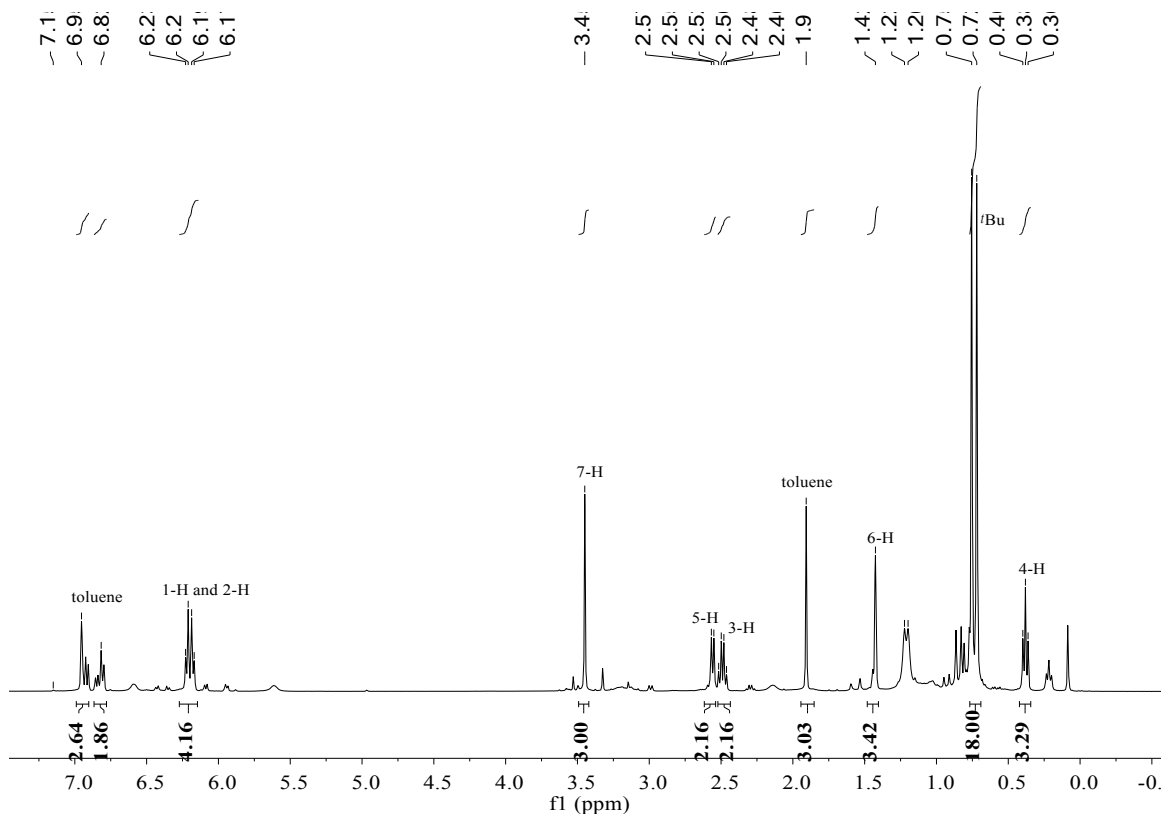

**Figure S30.**  $^1H$  NMR spectrum for reaction of PyAP- $t$ -Bu with  $Al(C_6F_5)_3 \cdot MMA$  (400 MHz,  $C_6D_6$ , 298 K) (9:1 mixture of isomer, only the major isomer was marked for clarity).

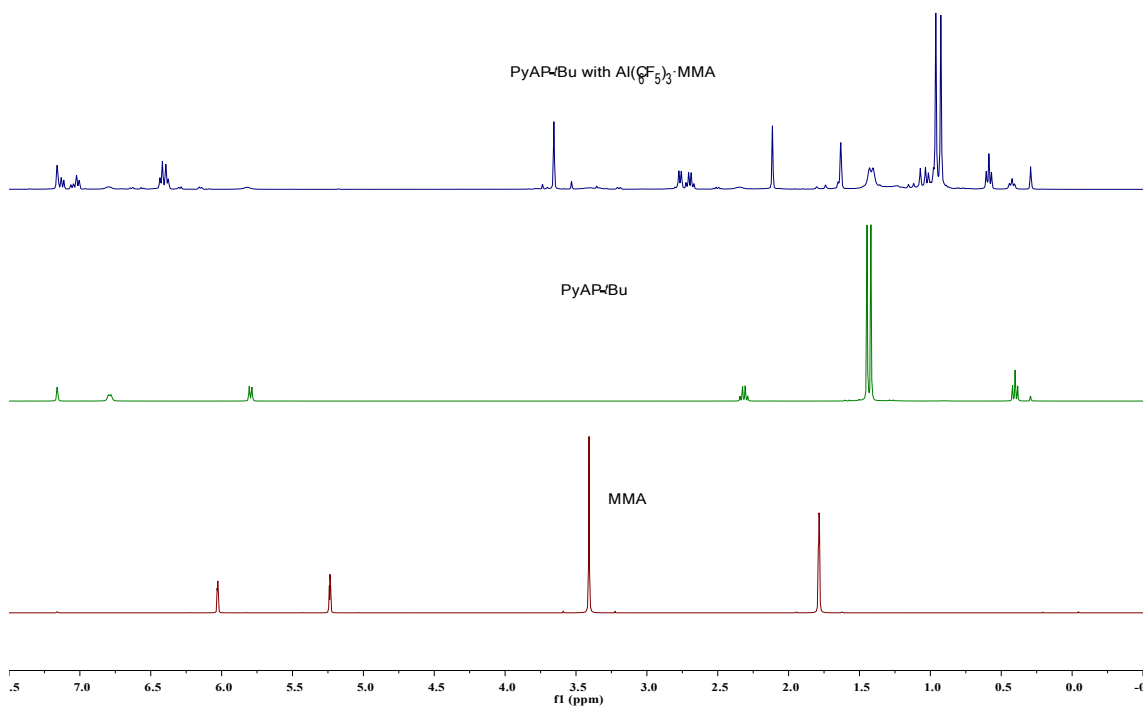

**Figure S31.** Stacked  $^1\text{H}$  NMR spectra for reaction of PyAP-tBu with  $\text{Al}(\text{C}_6\text{F}_5)_3 \cdot \text{MMA}$  (400 MHz,  $\text{C}_6\text{D}_6$ , 298 K)

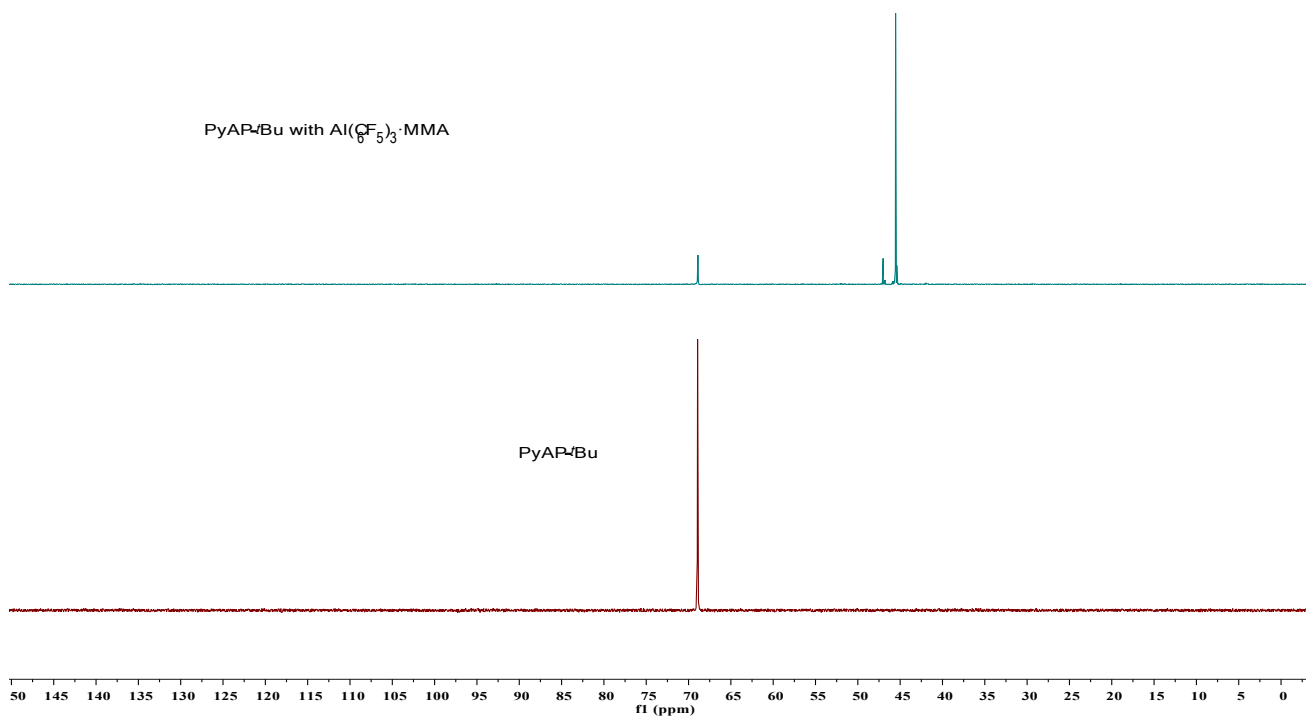

**Figure S32.**  $^{31}\text{P}\{^1\text{H}\}$  NMR spectrum for reaction of PyAP-*t*Bu with  $\text{Al}(\text{C}_6\text{F}_5)_3 \cdot \text{MMA}$  (162 MHz,  $\text{C}_6\text{D}_6$ , 298 K)

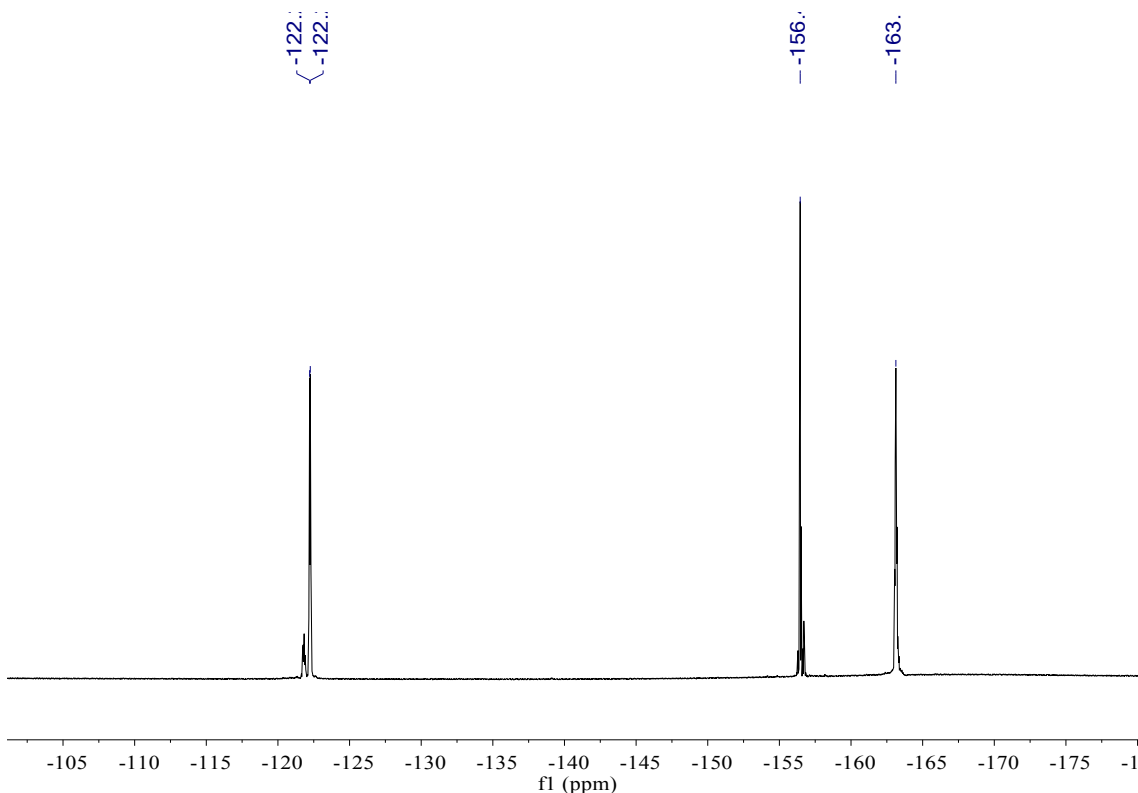

**Figure S33.**  $^{19}\text{F}\{^1\text{H}\}$  NMR spectrum for reaction of PyAP-*t*Bu with  $\text{Al}(\text{C}_6\text{F}_5)_3$  (376 MHz,  $\text{C}_6\text{D}_6$ , 298 K)

### 2.11 Stoichiometric NMR Reaction of PyAP-Cy with $\text{MeAl}(\text{BHT})_2 \cdot \text{MMA}$ in a 1:1 ratio

In an argon-filled glovebox, a NMR tube was charged with 12.7 mg (0.04 mmol) of PyAP-Cy and 0.3 mL of  $\text{C}_6\text{D}_6$ . A 0.3 mL  $\text{C}_6\text{D}_6$  solution of  $\text{MeAl}(\text{BHT})_2$  (18.7 mg, 0.04 mmol) and 4.2  $\mu\text{L}$  MMA (0.04 mmol) were slowly added to this tube via pipet at room temperature. The mixture was allowed to react for 5 min at room temperature before the NMR spectra were recorded. Zwitterionic enolaluminate was generated as two isomers (E/Z = 9:1). Only the major isomer was analyzed.

$^1\text{H}$  NMR (400 MHz,  $\text{C}_6\text{D}_6$ , 298 K)  $\delta$  (ppm) = 7.26 (s, 4H, BHT-phenyl), 6.53 (d, 2H,  $^3J_{\text{HH}} = 7.3$  Hz, 1-H), 6.08 (d, 2H,  $^3J_{\text{HH}} = 7.3$  Hz, 2-H), 3.61 (s, 3H, 7-H), 2.52 (q,  $^3J_{\text{HH}} = 7.3$  Hz, 2H, 3-H), 2.37 (d,  $^2J_{\text{PH}} = 7.0$  Hz, 2H, 5-H), 2.31 (s, 6H, BHT-Me), 1.85 (s, 39H, BHT-*t*Bu and 6-H), 1.00-1.60 (m, 22H, Cy), 0.45 (t,  $^3J_{\text{HH}} = 7.3$  Hz, 3H, 4-H), 0.27 (s, 3H, Al-Me).



$^{31}\text{P}$   $\{^1\text{H}\}$  NMR (162 MHz,  $\text{C}_6\text{D}_6$ , 298 K)  $\delta$  (ppm) = 36.8 (s).

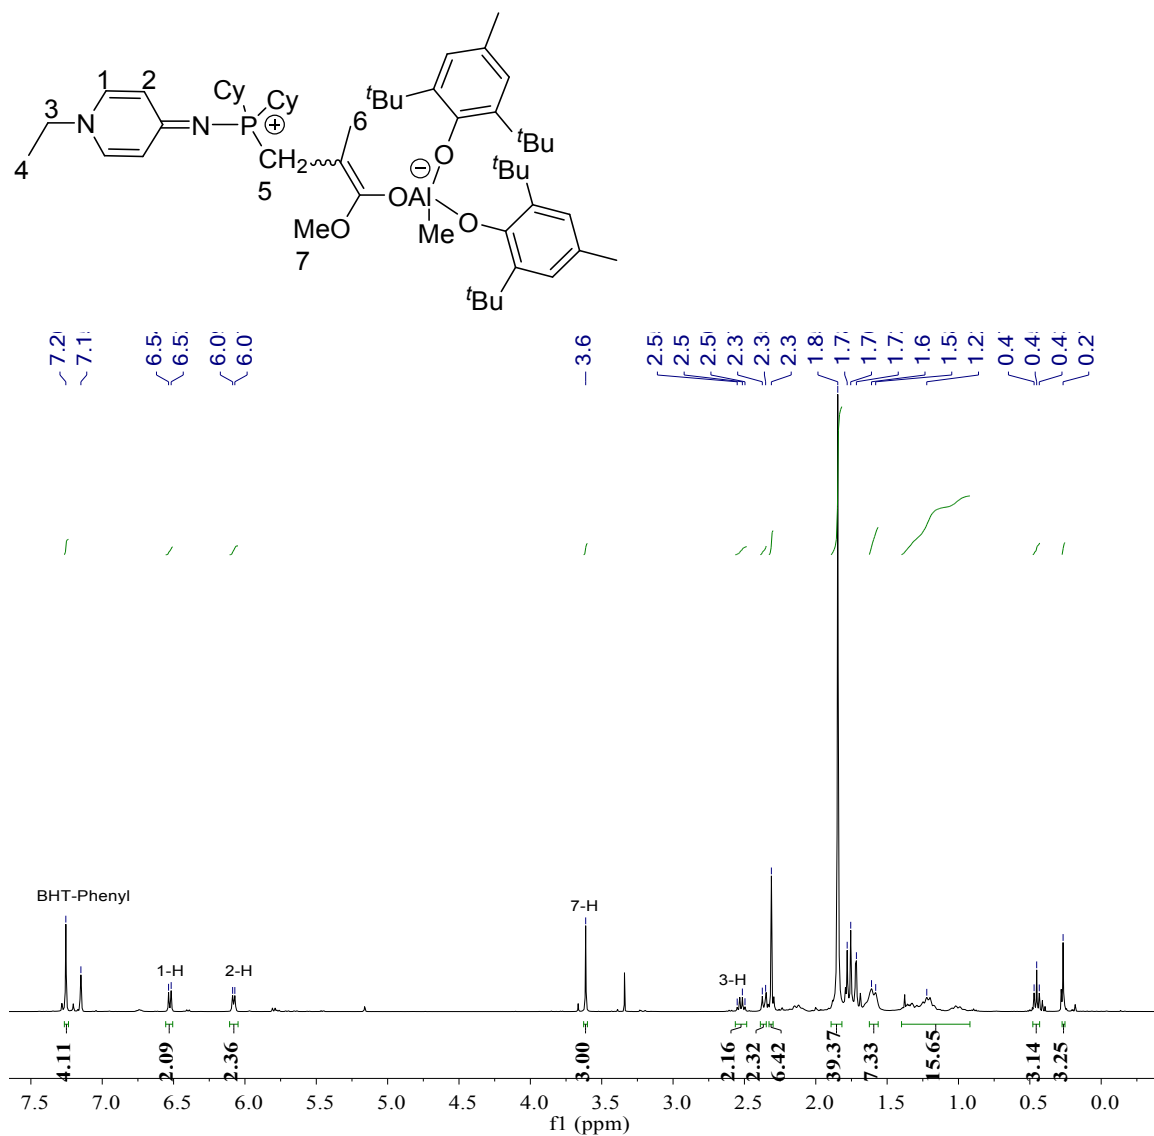

**Figure S34.**  $^1\text{H}$  NMR spectrum for reaction of PyAP-Cy with  $\text{MeAl}(\text{BHT})_2\cdot\text{MMA}$  (400 MHz,  $\text{C}_6\text{D}_6$ , 298 K) (9:1 mixture of isomer, only the major isomer was marked for clarity).

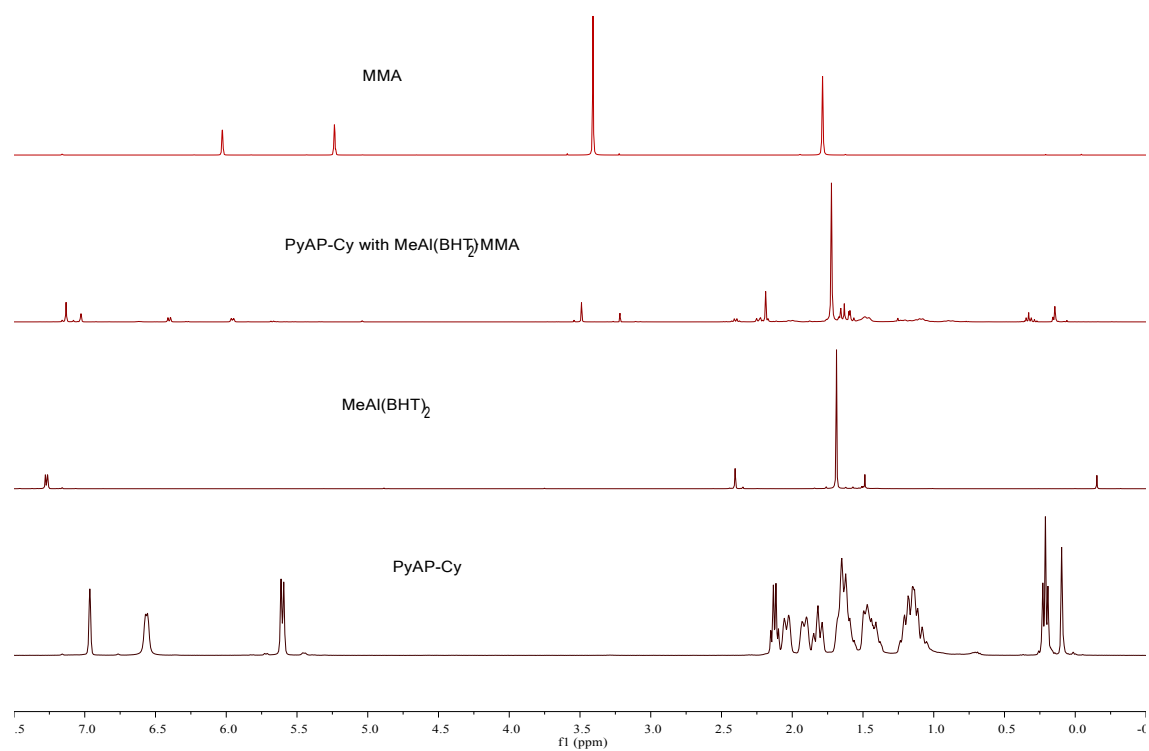

**Figure S35.** Stacked <sup>1</sup>H NMR spectra for reaction of PyAP-Cy with MeAl(BHT)<sub>2</sub>·MMA (400 MHz, C<sub>6</sub>D<sub>6</sub>, 298 K)

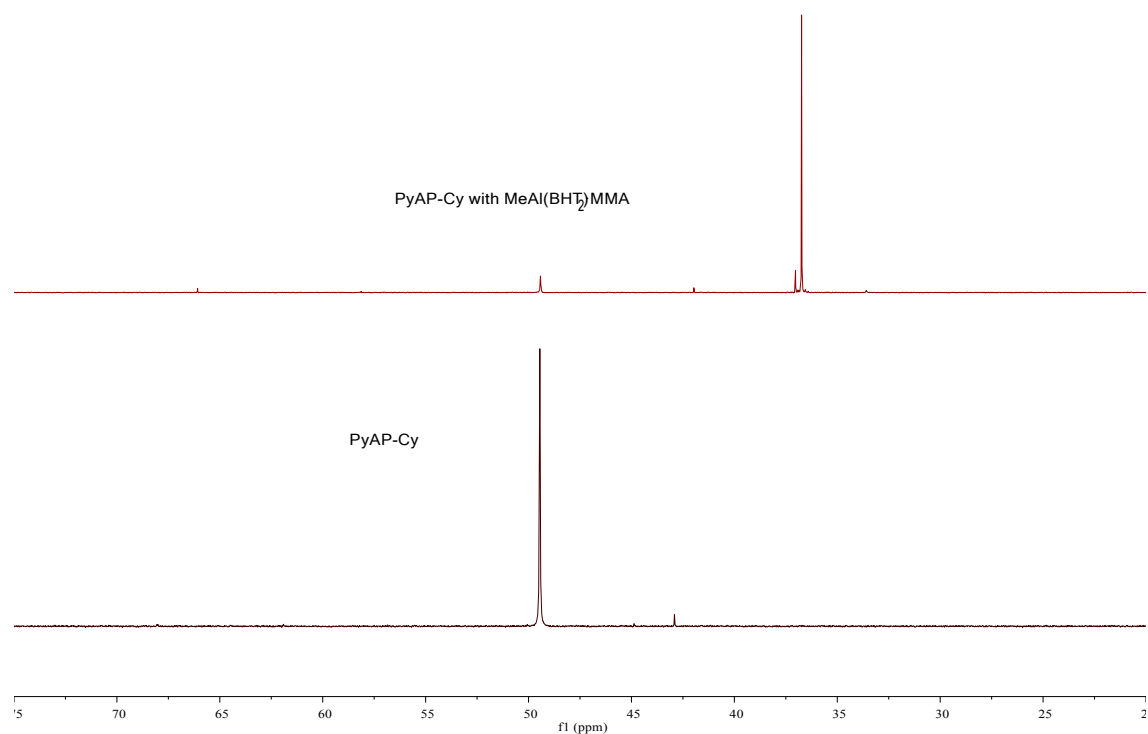

**Figure S36.**  $^{31}\text{P}\{^1\text{H}\}$  NMR spectrum for reaction of PyAP-Cy with  $\text{MeAl}(\text{BHT})_2\cdot\text{MMA}$  (162 MHz,  $\text{C}_6\text{D}_6$ , 298 K)

### 2.12 Stoichiometric NMR Reaction of PyAP-*t*Bu with $\text{MeAl}(\text{BHT})_2\cdot\text{MMA}$ in a 1:1 molar ratio

In an argon-filled glovebox, a NMR tube was charged with 10.7 mg (0.04 mmol) of PyAP-*t*Bu and 0.3 mL of  $\text{C}_6\text{D}_6$ . A 0.3 mL  $\text{C}_6\text{D}_6$  solution of  $\text{MeAl}(\text{BHT})_2$  (18.7 mg, 0.04 mmol) and 4.2  $\mu\text{L}$  MMA (0.04 mmol) were slowly added to this tube via pipet at room temperature. The mixture was allowed to react for 5 min at room temperature before the NMR spectra were recorded. Zwitterionic enolaluminate was generated as two isomers (E/Z = 100:4). Only the major isomer was analyzed. Suitable single crystals of INT1 were obtained from its toluene solution at  $-35^\circ\text{C}$  for 2 days.

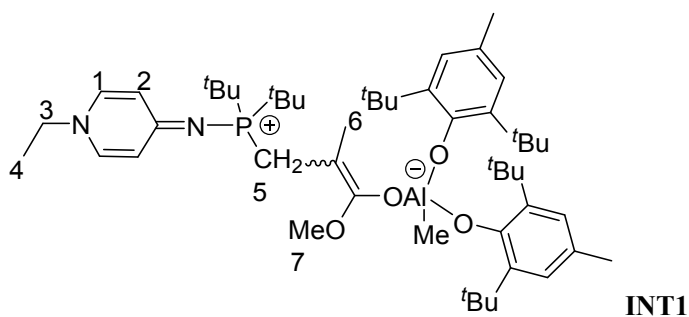

$^1\text{H}$  NMR (400 MHz,  $\text{C}_6\text{D}_6$ , 298 K)  $\delta$  (ppm) = 7.24 (s, 4H, BHT-phenyl), 6.49 (d, 2H,  $^3J_{\text{HH}} = 7.3$  Hz, 1-H), 6.12 (d, 2H,  $^3J_{\text{HH}} = 7.3$  Hz, 2-H), 3.71 (s, 3H, 7-H), 2.80 (d,  $^2J_{\text{PH}} = 7.0$  Hz, 2H, 5-H), 2.58 (q,  $^3J_{\text{HH}} = 7.3$  Hz, 2H, 3-H), 2.30 (s, 6H, BHT-Me), 1.83 (s, 36H, BHT- $^t\text{Bu}$ ), 1.74 (s, 3H, 6-H), 1.00 (d,  $^3J_{\text{PH}} = 14.1$  Hz, 18H,  $^t\text{Bu}$ ), 0.54 (t,  $^3J_{\text{HH}} = 7.3$  Hz, 3H, 4-H), 0.30 (s, 3H, Al-Me).  $^{31}\text{P}$   $\{^1\text{H}\}$  NMR (162 MHz,  $\text{C}_6\text{D}_6$ , 298 K)  $\delta$  (ppm) = 36.8 (s).

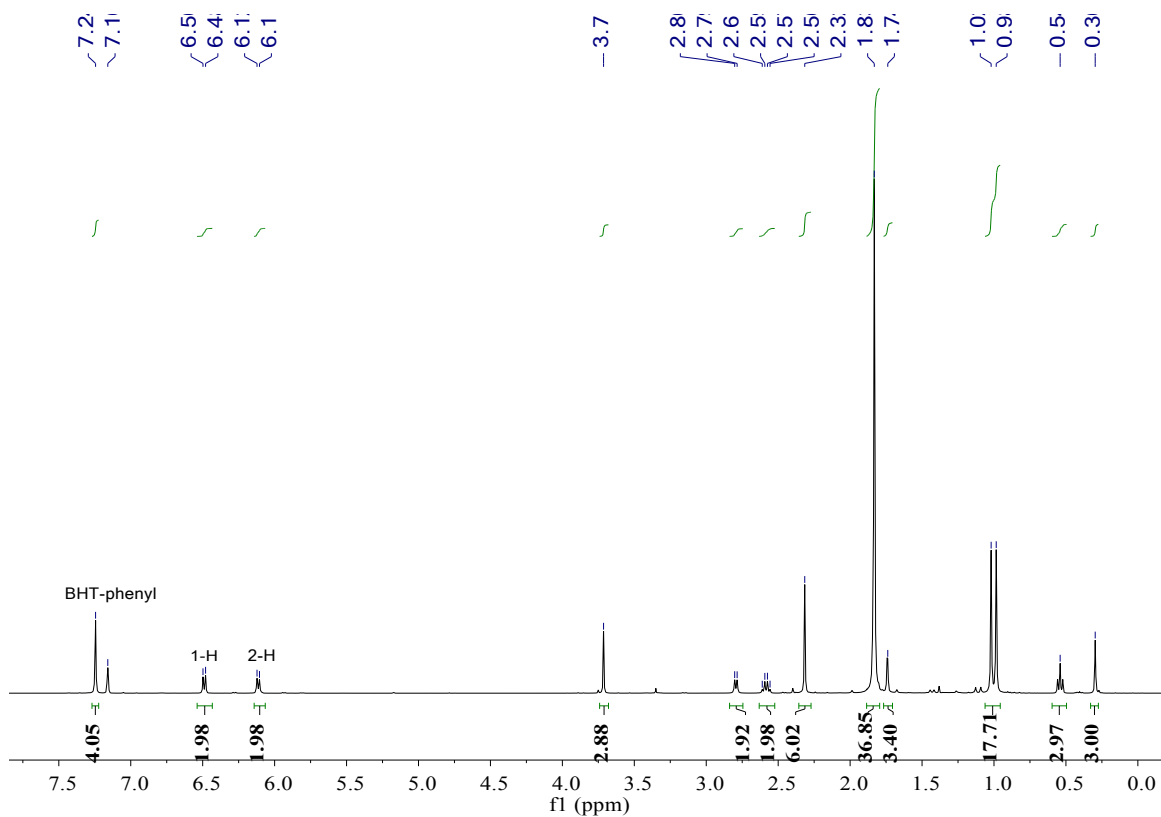

**Figure S37.**  $^1\text{H}$  NMR spectrum for reaction of PyAP- $^t\text{Bu}$  with  $\text{MeAl}(\text{BHT})_2\cdot\text{MMA}$  (400 MHz,  $\text{C}_6\text{D}_6$ , 298 K) (100:4 mixture of isomer, only the major isomer was marked for clarity).

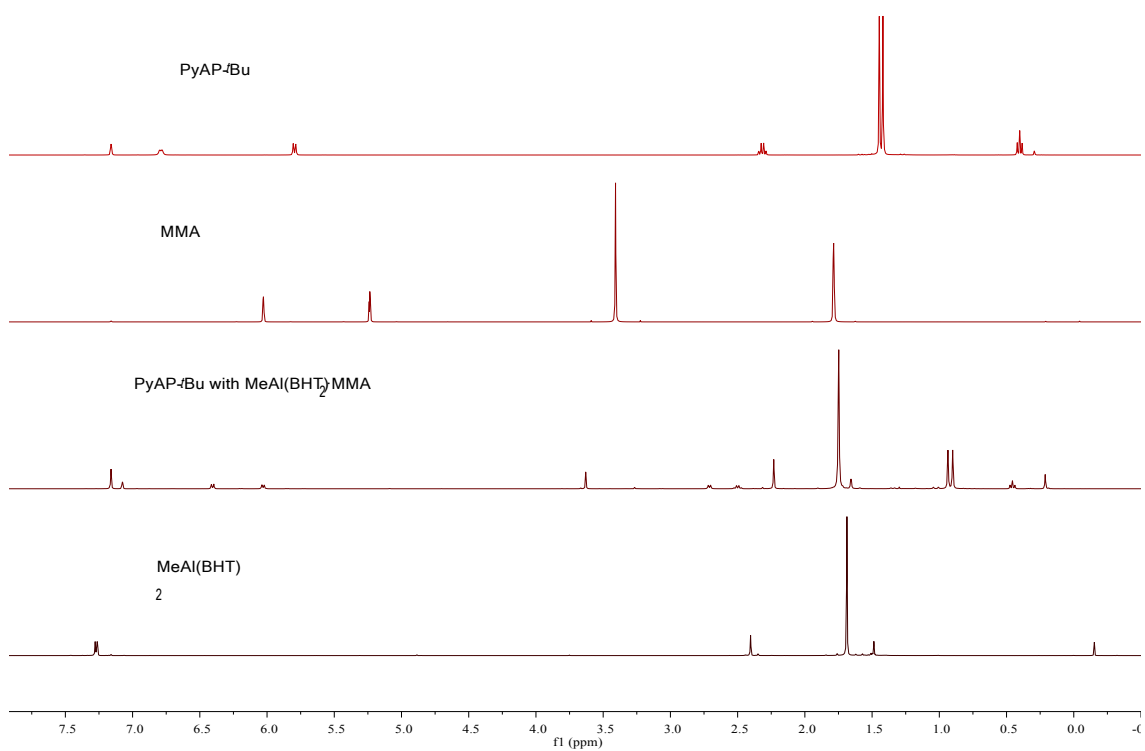

**Figure S38.** Stacked <sup>1</sup>H NMR spectra for reaction of PyAP-tBu with MeAl(BHT)<sub>2</sub>·MMA (400 MHz, C<sub>6</sub>D<sub>6</sub>, 298 K)

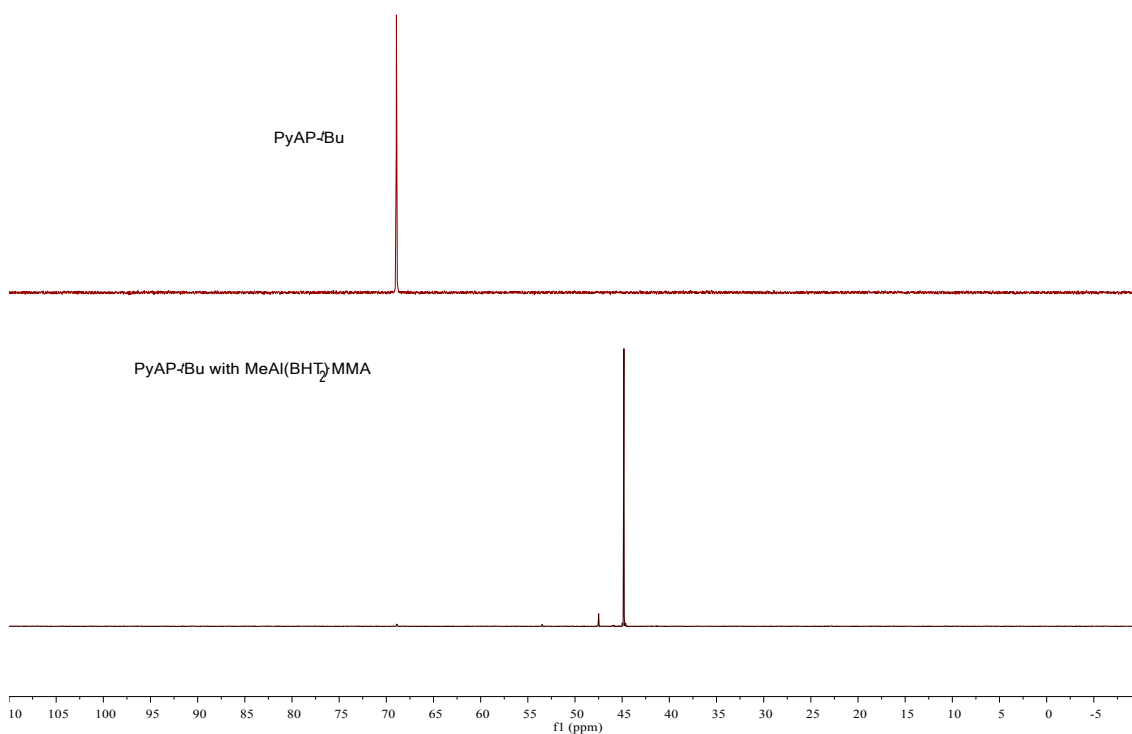

**Figure S39.**  $^{31}\text{P}\{^1\text{H}\}$  NMR spectrum for reaction of PyAP-*t*Bu with  $\text{MeAl}(\text{BHT})_2 \cdot \text{MMA}$  (162 MHz,  $\text{C}_6\text{D}_6$ , 298 K)

### 2.13 Stoichiometric NMR Reaction of PyAP-*i*Pr with $\text{MeAl}(\text{BHT})_2 \cdot \text{MMA}$ in a 1:1 molar ratio

In an argon-filled glovebox, a NMR tube was charged with 9.5 mg (0.04 mmol) of PyAP-*i*Pr and 0.3 mL of  $\text{C}_6\text{D}_6$ . A 0.3 mL  $\text{C}_6\text{D}_6$  solution of  $\text{MeAl}(\text{BHT})_2$  (18.7 mg, 0.04 mmol) and 4.2  $\mu\text{L}$  MMA (0.04 mmol) were slowly added to this tube via pipet at room temperature. The mixture was allowed to react for 5 min at room temperature before the NMR spectra were recorded. Zwitterionic enolaluminate was generated as two isomers (E/Z = 100:8). Only the major isomer was analyzed.

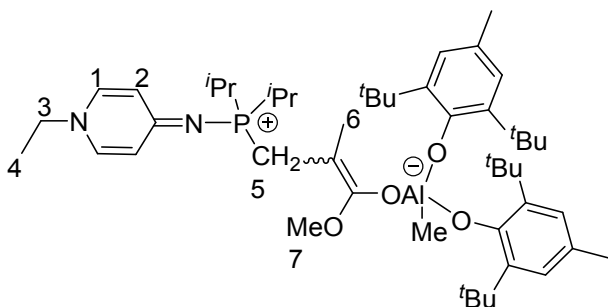

$^1\text{H}$  NMR (400 MHz,  $\text{C}_6\text{D}_6$ , 298 K)  $\delta$  (ppm) = 7.25 (s, 4H, BHT-phenyl), 6.43 (d, 2H,  $^3J_{\text{HH}} = 7.3$  Hz, 1-H), 5.95 (d, 2H,  $^3J_{\text{HH}} = 6.3$  Hz, 2-H), 3.59 (s, 3H, 7-H), 2.55 (q,  $^3J_{\text{HH}} = 7.3$  Hz, 2H, 3-H), 2.36 (d,  $^2J_{\text{PH}} = 9.1$  Hz, 2H, 5-H), 2.31 (s, 6H, BHT-Me), 2.13 (m, 2H, CH of *i*Pr), 1.83 (s, 36H, BHT-*t*Bu), 1.77 (s, 3H, 6-H), 0.91 (dt,  $^3J_{\text{PH}} = 14.1$  Hz,  $^3J_{\text{PH}} = 7.5$  Hz, 12H,  $\text{CH}_3$  of *i*Pr), 0.46 (t,  $^3J_{\text{HH}} = 7.3$  Hz, 3H, 4-H), 0.26 (s, 3H, Al-Me). CH of *i*Pr was not assigned due to the overlapping.  $^{31}\text{P}$   $\{^1\text{H}\}$  NMR (162 MHz,  $\text{C}_6\text{D}_6$ , 298 K)  $\delta$  (ppm) = 42.5 (s).

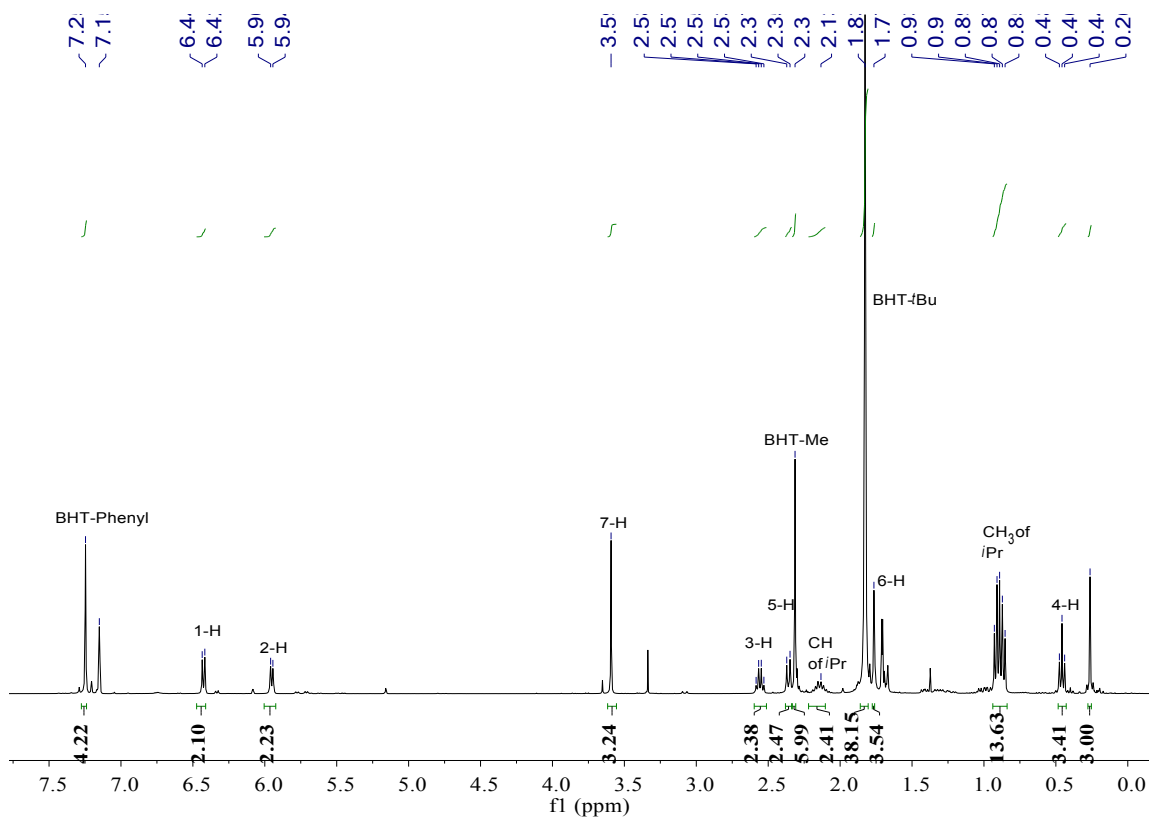

**Figure S40.**  $^1\text{H}$  NMR spectrum for reaction of  $\text{PyAP-}i\text{Pr}$  with  $\text{MeAl}(\text{BHT})_2\text{-MMA}$  (400 MHz,  $\text{C}_6\text{D}_6$ , 298 K) (100:8 mixture of isomer, only the major isomer was marked for clarity).

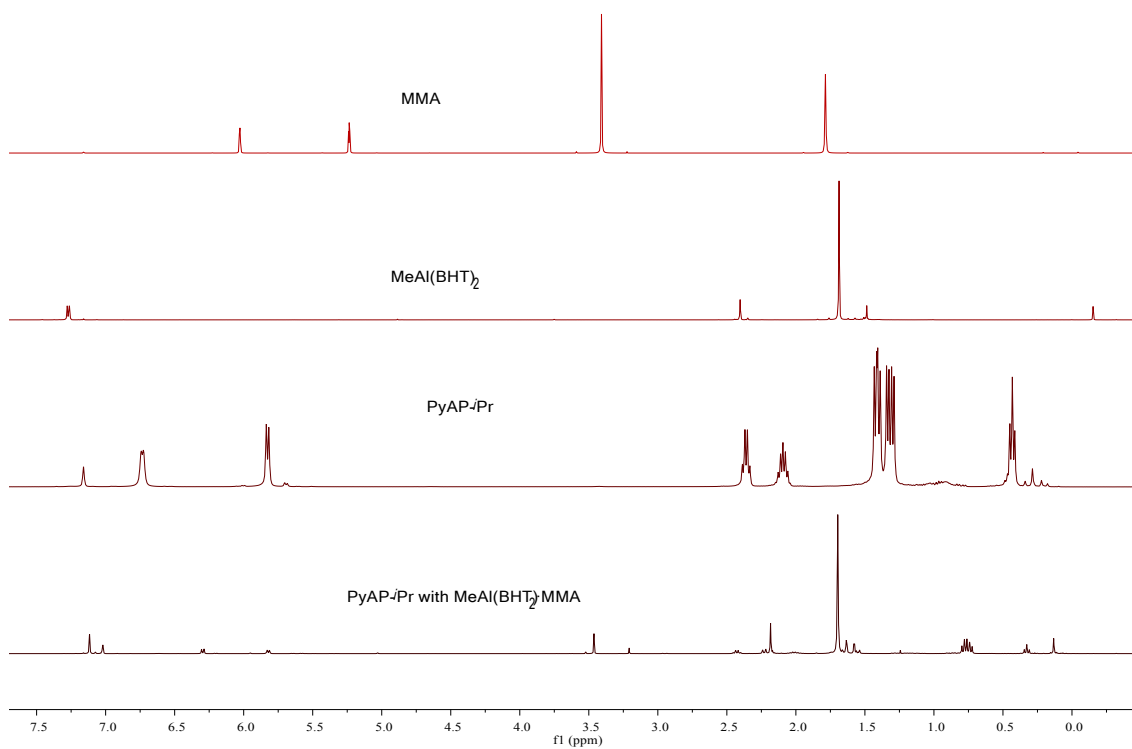

**Figure S41.** Stacked <sup>1</sup>H NMR spectra for reaction of PyAP-*i*Pr with MeAl(BHT)<sub>2</sub>·MMA (400 MHz, C<sub>6</sub>D<sub>6</sub>, 298 K)



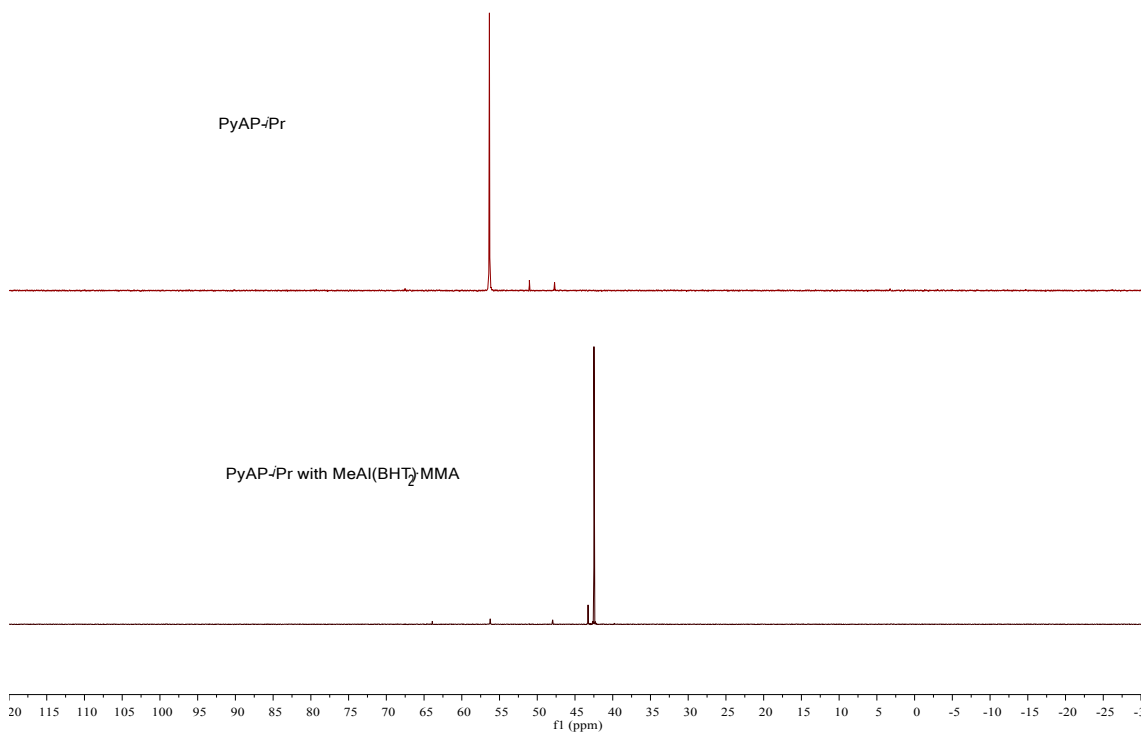

**Figure S42.**  $^{31}\text{P}\{^1\text{H}\}$  NMR spectrum for reaction of PyAP-*i*Pr with  $\text{MeAl}(\text{BHT})_2 \cdot \text{MMA}$  (162 MHz,  $\text{C}_6\text{D}_6$ , 298 K)

### 2.14 Stoichiometric NMR Reaction of PyAP-PPh with $\text{MeAl}(\text{BHT})_2 \cdot \text{MMA}$ in a 1:1 molar ratio

In an argon-filled glovebox, a NMR tube was charged with 12.3 mg (0.04 mmol) of PyAP-PPh and 0.3 mL of  $\text{C}_6\text{D}_6$ . A 0.3 mL  $\text{C}_6\text{D}_6$  solution of  $\text{MeAl}(\text{BHT})_2$  (18.7 mg, 0.04 mmol) and 4.2  $\mu\text{L}$  MMA (0.04 mmol) were slowly added to this tube via pipet at room temperature. The mixture was allowed to react for 5 min at room temperature before the NMR spectra were recorded. Zwitterionic enolaluminate was generated as two isomers (E/Z = 10:6). Only the major isomer was analyzed.

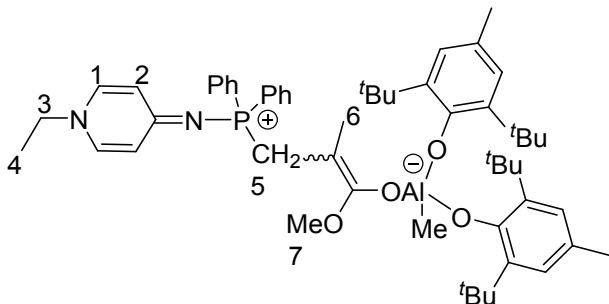

$^1\text{H}$  NMR (400 MHz,  $\text{C}_6\text{D}_6$ , 298 K)  $\delta$  (ppm) = 7.25 (s, 4H, BHT-phenyl), 7.05 (m, 10H, Ph), 6.38 (d, 2H,  $^3J_{\text{HH}} = 7.3$  Hz, 1-H), 6.01 (d, 2H,  $^3J_{\text{HH}} = 6.3$  Hz, 2-H), 3.42 (s, 3H, 7-H), 2.53 (q,  $^3J_{\text{HH}} = 7.3$  Hz, 2H, 3-H), 2.32 (d,  $^2J_{\text{PH}} = 9.1$  Hz, 2H, 5-H), 2.32 (s, 6H, BHT-Me), 1.79 (s, 39H, BHT-t-Bu and 6-H), 0.42 (t,  $^3J_{\text{HH}} = 7.3$  Hz, 3H, 4-H), 0.10 (s, 3H, Al-Me).  $^{31}\text{P}$   $\{^1\text{H}\}$  NMR (162 MHz,  $\text{C}_6\text{D}_6$ , 298 K)  $\delta$  (ppm) = 17.1 (s).

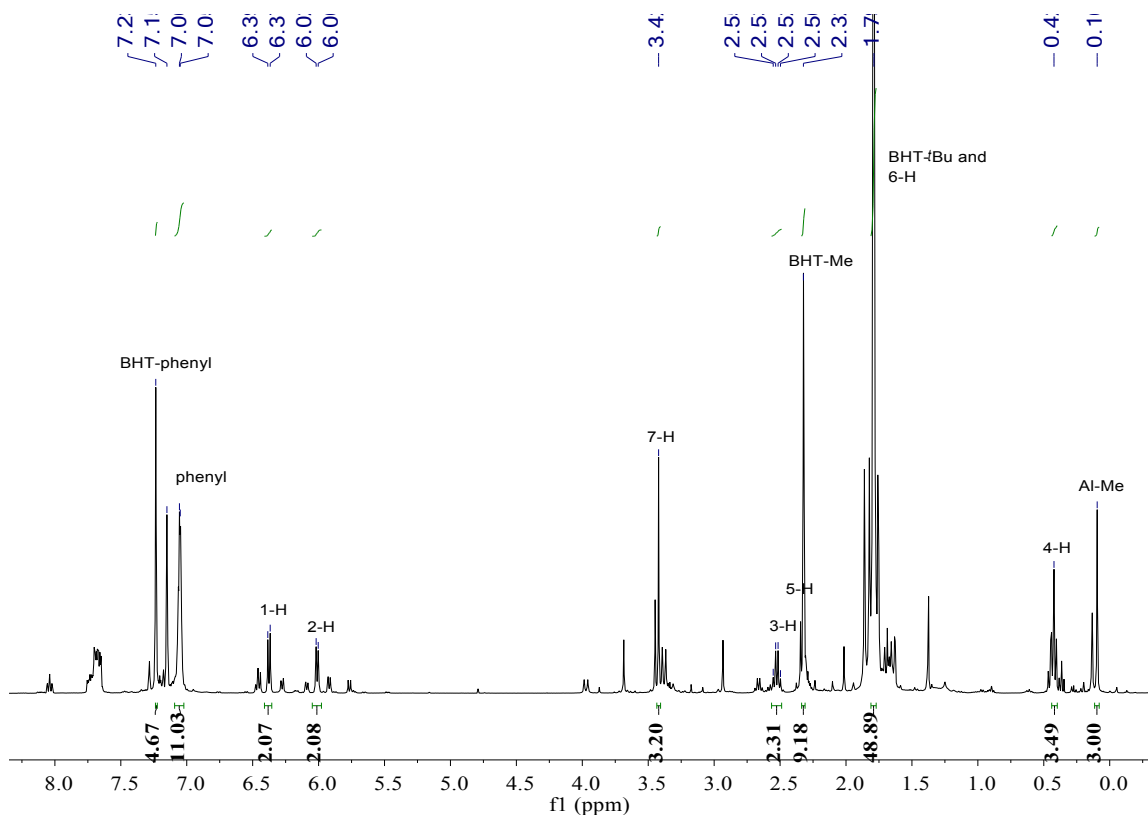

**Figure S43.**  $^1\text{H}$  NMR spectrum for reaction of PyAP-PPh with  $\text{MeAl}(\text{BHT})_2\cdot\text{MMA}$  (400 MHz,  $\text{C}_6\text{D}_6$ , 298 K) (10:6 mixture of isomer, only the major isomer was marked for clarity).

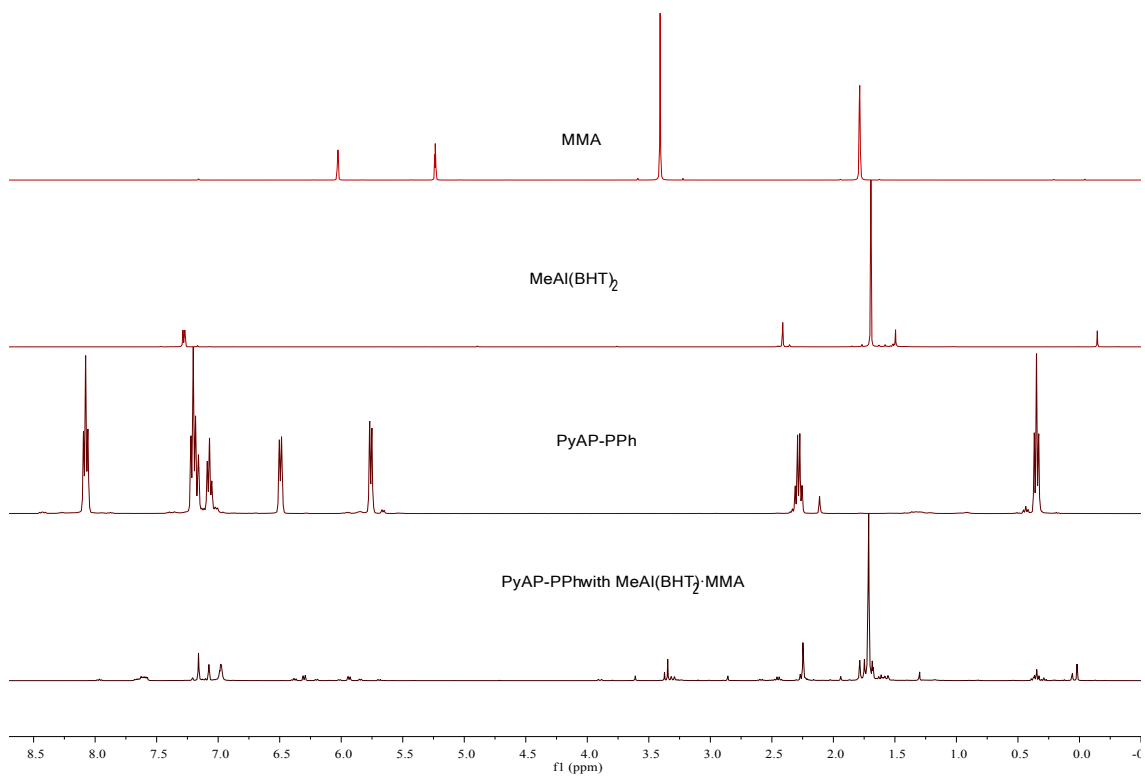

**Figure S44.** Stacked <sup>1</sup>H NMR spectra for reaction of PyAP-PPh with MeAl(BHT)<sub>2</sub>·MMA (400 MHz, C<sub>6</sub>D<sub>6</sub>, 298 K)

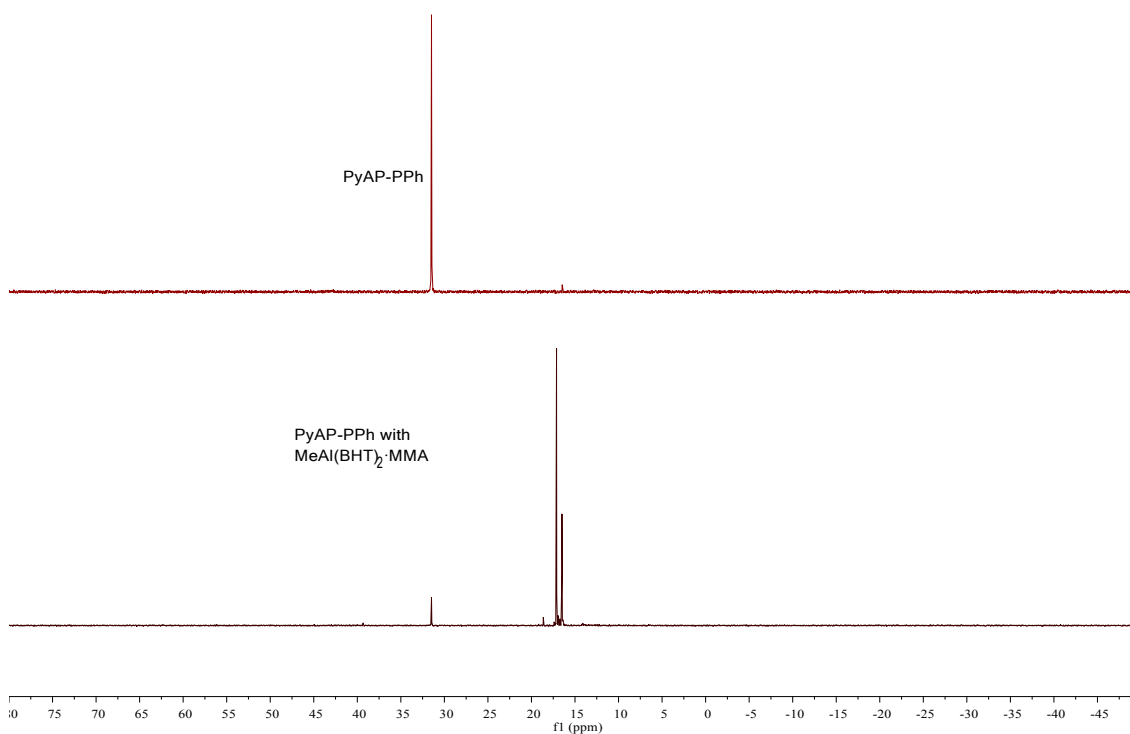

**Figure S45.**  $^{31}\text{P}\{^1\text{H}\}$  NMR spectrum for reaction of PyAP-PPh with MeAl(BHT) $_2$ ·MMA (162 MHz, C $_6$ D $_6$ , 298 K)

### 2.15 Stoichiometric NMR Reaction of PyAP-Cy with $^i\text{BuAl(BHT)}_2$ ·MMA in a 1:1 molar ratio

In an argon-filled glovebox, a NMR tube was charged with 12.7 mg (0.04 mmol) of PyAP-Cy and 0.3 mL of C $_6$ D $_6$ . A 0.3 mL C $_6$ D $_6$  solution of  $^i\text{BuAl(BHT)}_2$  (20.9mg, 0.04 mmol) and 4.2  $\mu\text{L}$  MMA (0.04 mmol) were slowly added to this tube via pipet at room temperature. The mixture was allowed to react for 5 min at room temperature before the NMR spectra were recorded. Zwitterionic enolaluminate was generated as two isomers (E/Z = 5:1). Only the major isomer was analyzed.

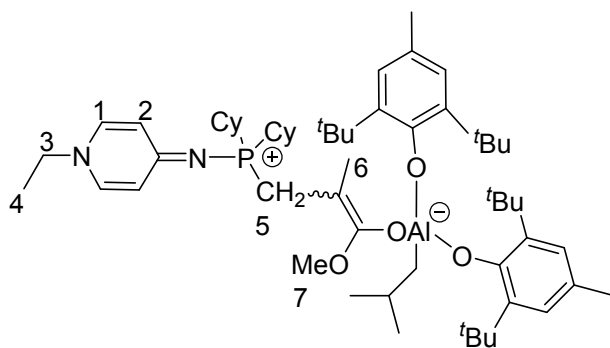

$^1\text{H}$  NMR (400 MHz,  $\text{C}_6\text{D}_6$ , 298 K)  $\delta$  (ppm) = 7.31 (s, 4H, BHT-phenyl), 6.50 (d, 2H,  $^3J_{\text{HH}} = 7.3$  Hz, 1-H), 6.17 (d, 2H,  $^3J_{\text{HH}} = 7.3$  Hz, 2-H), 3.61 (s, 3H, 7-H), 2.58 (q,  $^3J_{\text{HH}} = 7.3$  Hz, 2H, 3-H), 2.42 (d,  $^2J_{\text{PH}} = 7.0$  Hz, 2H, 5-H), 2.33 (s, 6H, BHT-Me), 1.89, 1.85 (s, 39H, BHT- $^t\text{Bu}$  and 6-H), 1.00-1.62 (m, 22H, Cy), 1.40 (d,  $^3J_{\text{HH}} = 6.4$  Hz, 6H,  $\text{CH}_3$  of  $^t\text{Bu}$ ), 0.93 (d,  $^3J_{\text{HH}} = 6.5$  Hz, 2H,  $\text{CH}_2$  of  $^t\text{Bu}$ ), 0.28 (t,  $^3J_{\text{HH}} = 7.3$  Hz, 3H, 4-H), CH of  $^t\text{Bu}$  was not assigned due to the overlapping.  $^{31}\text{P}$   $\{^1\text{H}\}$  NMR (162 MHz,  $\text{C}_6\text{D}_6$ , 298 K)  $\delta$  (ppm) = 36.6 (s).

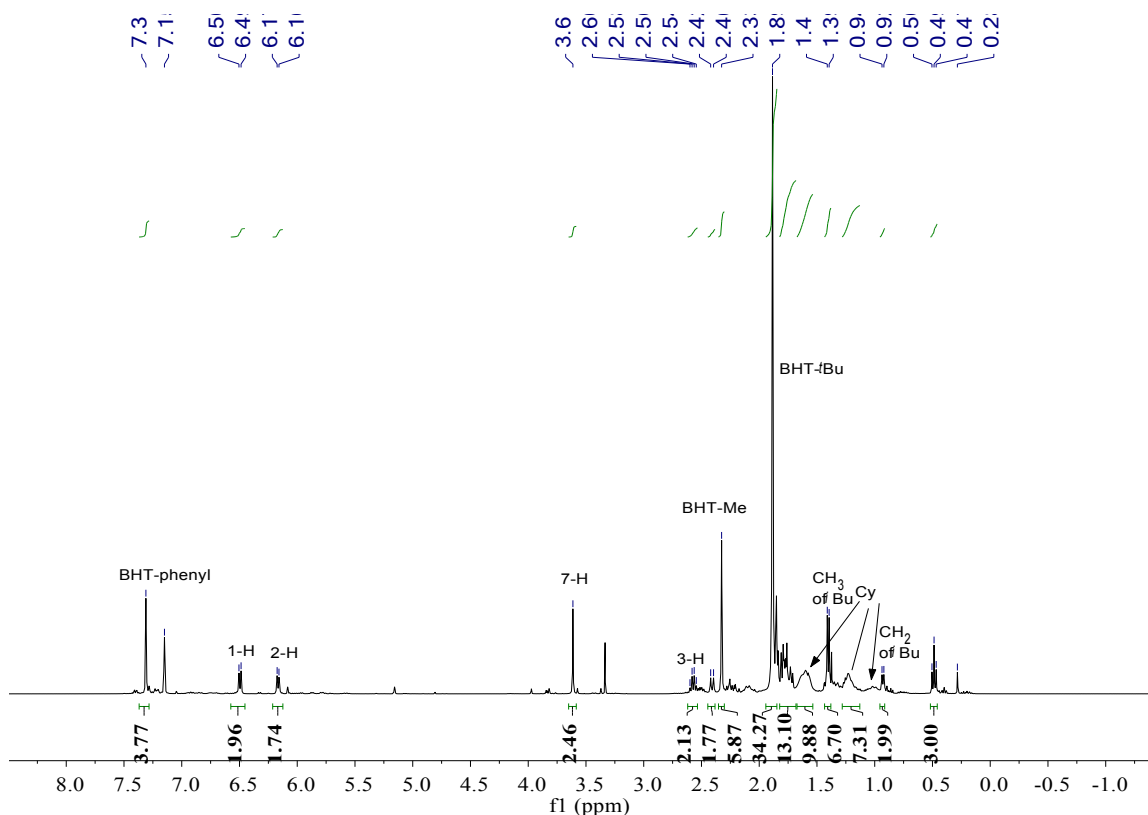

**Figure S46.**  $^1\text{H}$  NMR spectrum for reaction of PyAP-Cy with  $^t\text{BuAl}(\text{BHT})_2\cdot\text{MMA}$  (400 MHz,  $\text{C}_6\text{D}_6$ , 298 K) (5:1 mixture of isomer, only the major isomer was marked for clarity).

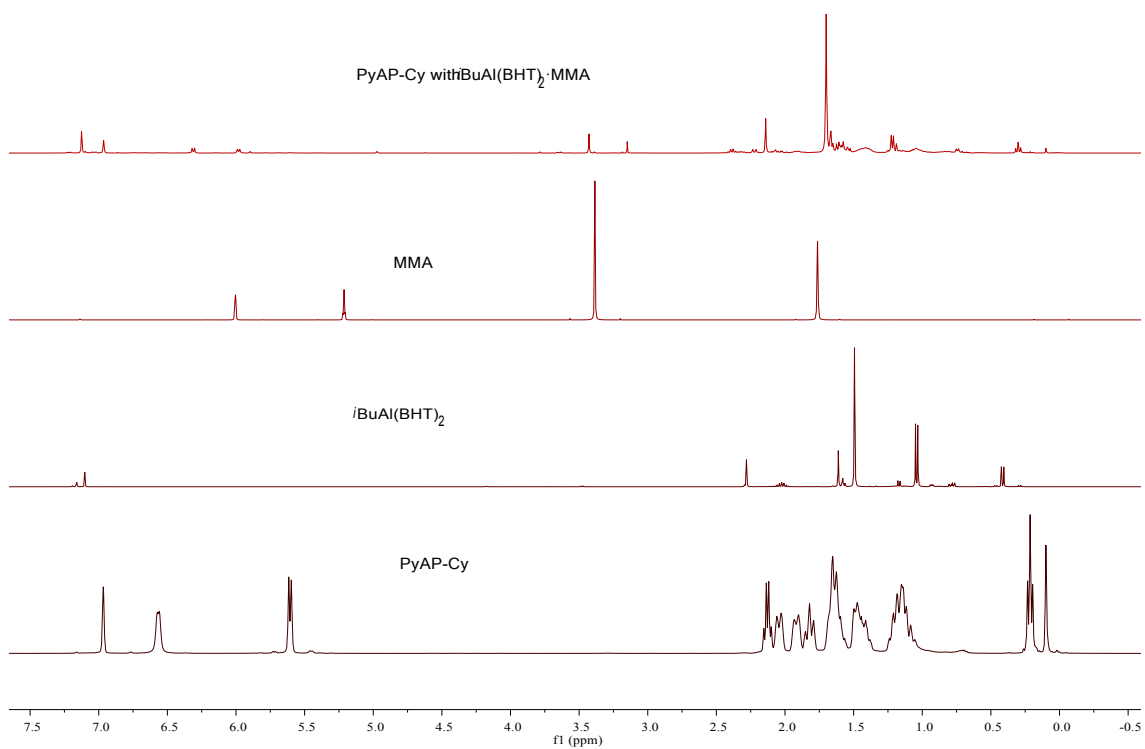

**Figure S47.** Stacked <sup>1</sup>H NMR spectra for reaction of PyAP-Cy with *i*BuAl(BHT)<sub>2</sub>·MMA (400 MHz, C<sub>6</sub>D<sub>6</sub>, 298 K)

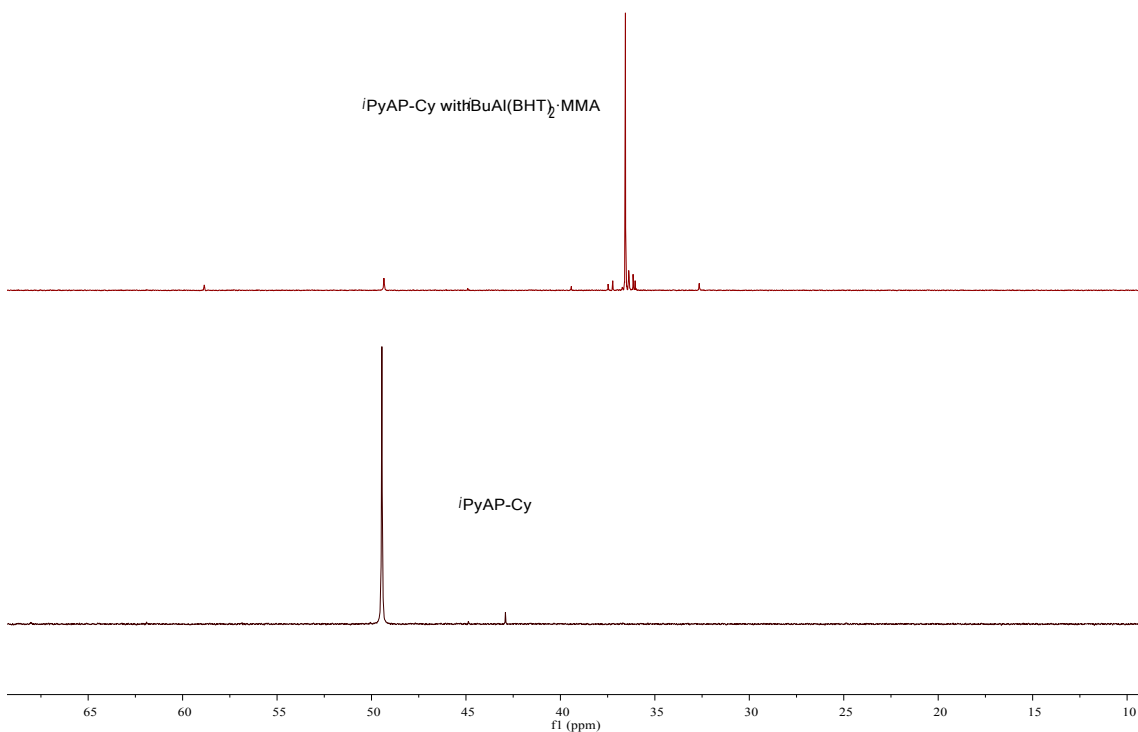

**Figure S48.**  $^{31}\text{P}\{^1\text{H}\}$  NMR spectrum for reaction of PyAP-Cy with  $^i\text{BuAl}(\text{BHT})_2 \cdot \text{MMA}$  (162 MHz,  $\text{C}_6\text{D}_6$ , 298 K)

### 2.16 Stoichiometric NMR Reaction of PyAP- $^i\text{Bu}$ with $^i\text{BuAl}(\text{BHT})_2 \cdot \text{MMA}$ in a 1:1 molar ratio

In an argon-filled glovebox, a NMR tube was charged with 10.7 mg (0.04 mmol) of PyAP- $^i\text{Bu}$  and 0.3 mL of  $\text{C}_6\text{D}_6$ . A 0.3 mL  $\text{C}_6\text{D}_6$  solution of  $^i\text{BuAl}(\text{BHT})_2$  (20.9mg, 0.04 mmol) and 4.2  $\mu\text{L}$  MMA (0.04 mmol) were slowly added to this tube via pipet at room temperature. The mixture was allowed to react for 5 min at room temperature before the NMR spectra were recorded. Zwitterionic enolaluminate was generated as two isomers (E/Z = 8:2). Only the major isomer was analyzed.

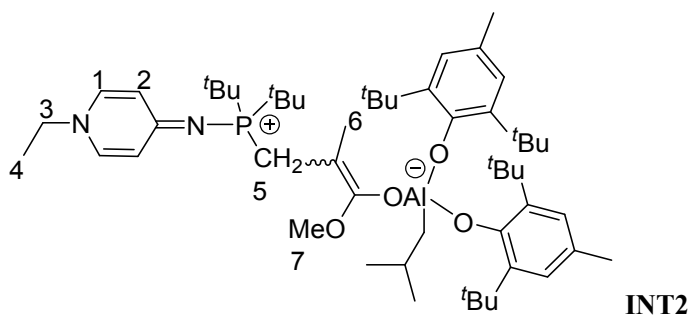

$^1\text{H}$  NMR (400 MHz,  $\text{C}_6\text{D}_6$ , 298 K)  $\delta$  (ppm) = 7.29 (s, 4H, BHT-phenyl), 6.45 (d, 2H,  $^3J_{\text{HH}} = 7.3$  Hz, 1-H), 6.22 (d, 2H,  $^3J_{\text{HH}} = 7.3$  Hz, 2-H), 3.71 (s, 3H, 7-H), 2.85 (d,  $^2J_{\text{PH}} = 7.0$  Hz, 2H, 5-H), 2.60 (q,  $^3J_{\text{HH}} = 7.3$  Hz, 2H, 3-H), 2.32 (s, 6H, BHT-Me), 1.90 (s, 3H, 6-H), 1.87 (s, 36H, BHT- $t$ Bu), 1.37 (d,  $^3J_{\text{HH}} = 6.4$  Hz, 6H,  $\text{CH}_3$  of  $t$ Bu), 1.00 (d,  $^3J_{\text{PH}} = 14.1$  Hz, 18H,  $t$ Bu), 0.54 (t,  $^3J_{\text{HH}} = 7.3$  Hz, 3H, 4-H),  $\text{CH}_2$ ,  $\text{CH}$  of  $t$ Bu were not assigned due to the overlapping.  $^{31}\text{P}$   $\{^1\text{H}\}$  NMR (162 MHz,  $\text{C}_6\text{D}_6$ , 298 K)  $\delta$  (ppm) = 44.8 (s).

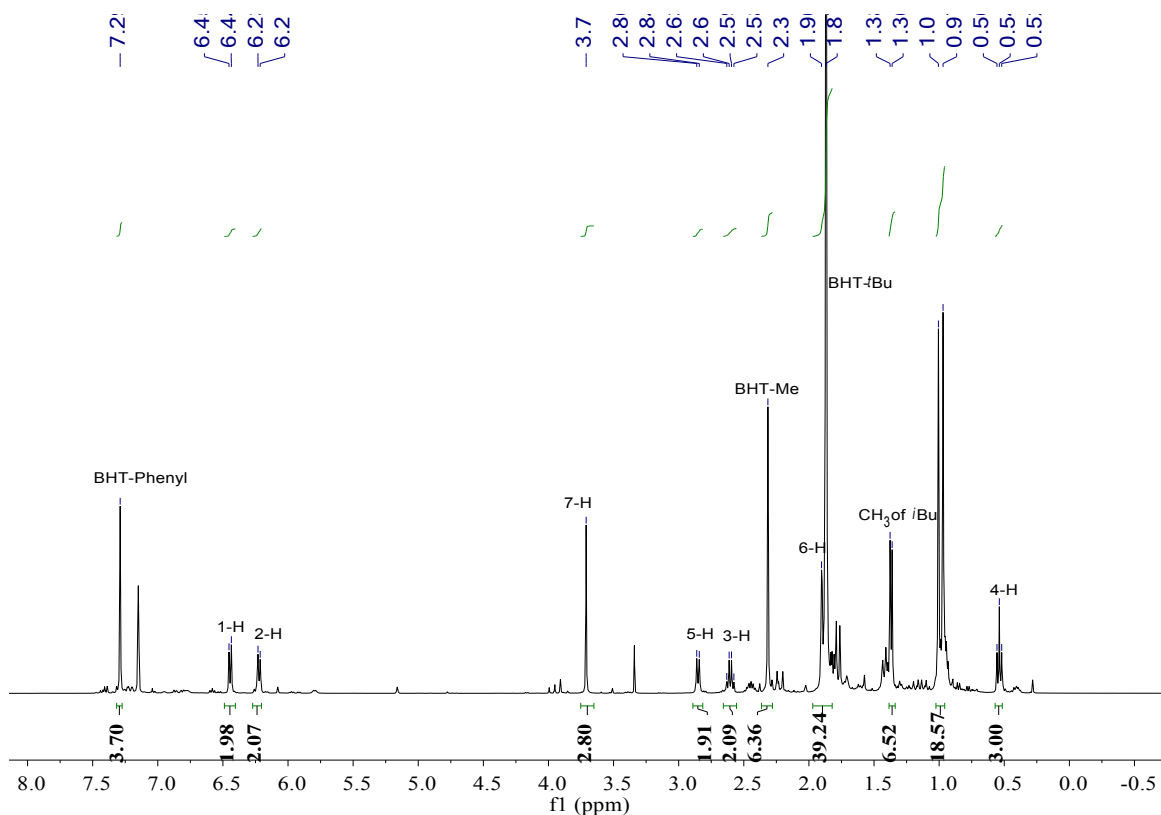

**Figure S49.**  $^1\text{H}$  NMR spectrum for reaction of PyAP- $t$ Bu with  $t$ BuAl(BHT) $_2$  (400 MHz,  $\text{C}_6\text{D}_6$ , 298 K) (5:1 mixture of isomer, only the major isomer was marked for clarity).



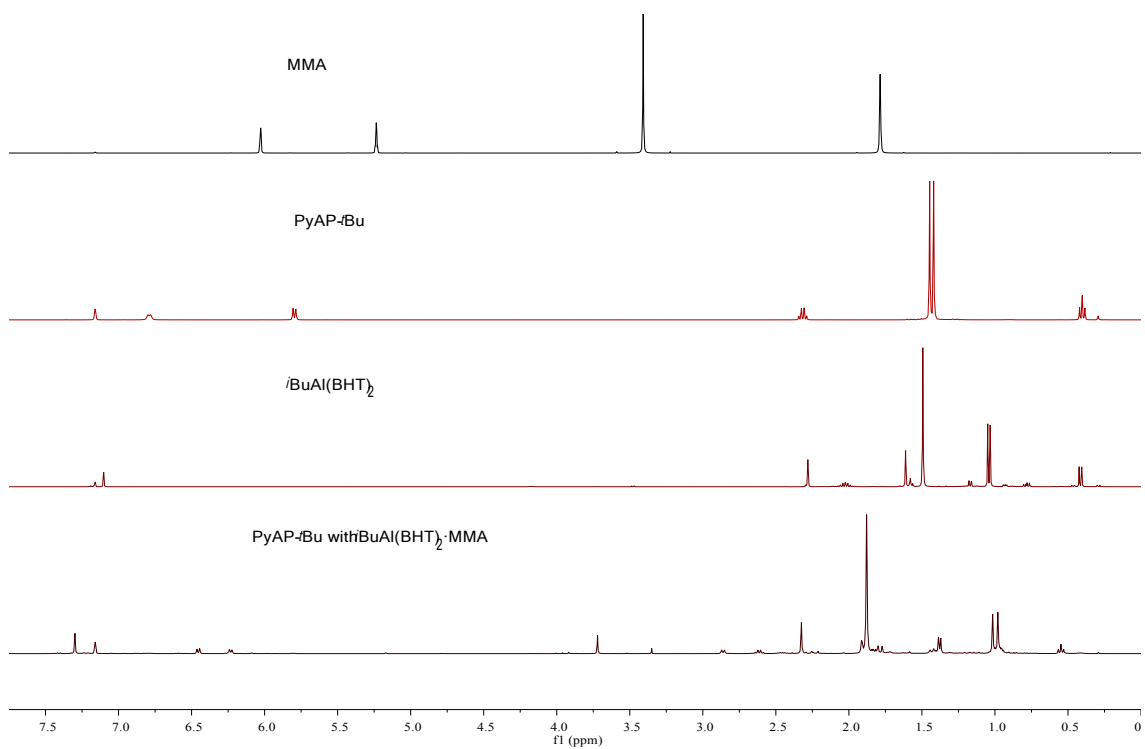

**Figure S50.** Stacked  $^1\text{H}$  NMR spectra for reaction of PyAP-*t*Bu with *t*BuAl(BHT)<sub>2</sub>·MMA (400 MHz,  $\text{C}_6\text{D}_6$ , 298 K)

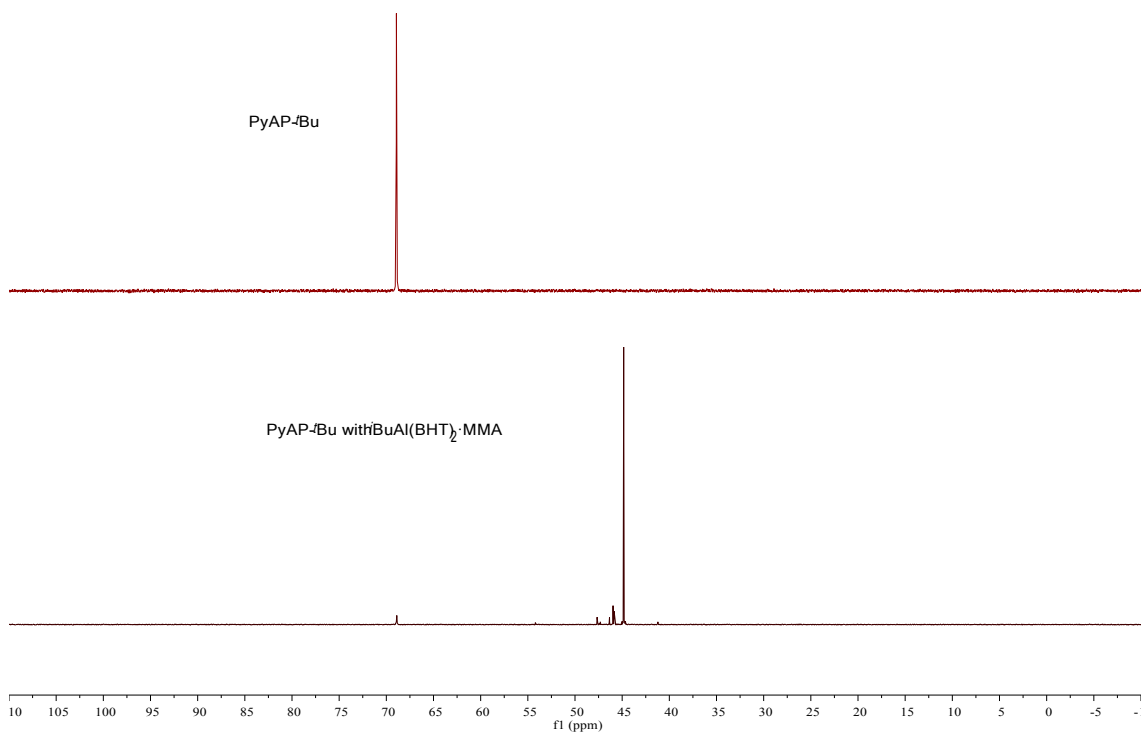

**Figure S51.**  $^{31}\text{P}\{^1\text{H}\}$  NMR spectrum for reaction of PyAP-*i*Bu with  $^i\text{BuAl}(\text{BHT})_2 \cdot \text{MMA}$  (162 MHz,  $\text{C}_6\text{D}_6$ , 298 K)

### 2.17 Stoichiometric NMR Reaction of PyAP-*i*Pr with $^i\text{BuAl}(\text{BHT})_2 \cdot \text{MMA}$ in a 1:1 molar ratio

In an argon-filled glovebox, a NMR tube was charged with 9.5 mg (0.04 mmol) of PyAP-*i*Pr and 0.3 mL of  $\text{C}_6\text{D}_6$ . A 0.3 mL  $\text{C}_6\text{D}_6$  solution of  $^i\text{BuAl}(\text{BHT})_2$  (20.9 mg, 0.04 mmol) and 4.2  $\mu\text{L}$  MMA (0.04 mmol) were slowly added to this tube via pipet at room temperature. The mixture was allowed to react for 5 min at room temperature before the NMR spectra were recorded. Zwitterionic enolaluminates were generated as two isomers (E/Z = 10:1). Only the major isomer was analyzed.

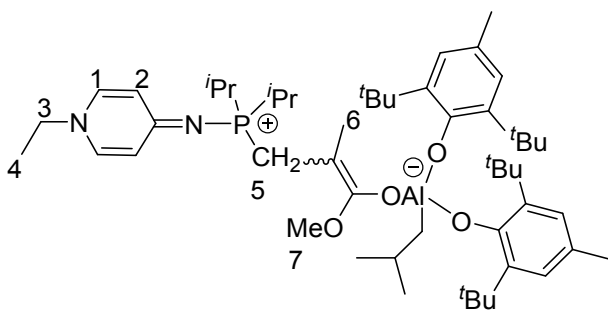

$^1\text{H}$  NMR (400 MHz,  $\text{C}_6\text{D}_6$ , 298 K)  $\delta$  (ppm) = 7.31 (s, 4H, BHT-phenyl), 6.41 (d, 2H,  $^3J_{\text{HH}} = 7.3$  Hz, 1-H), 6.12 (d, 2H,  $^3J_{\text{HH}} = 6.3$  Hz, 2-H), 3.61 (s, 3H, 7-H), 2.60 (q,  $^3J_{\text{HH}} = 7.3$  Hz, 2H, 3-H), 2.39 (d,  $^2J_{\text{PH}} = 9.1$  Hz, 2H, 5-H), 2.32 (s, 6H, BHT-Me), 2.13 (m, 2H, CH of *i*Pr), 1.87 (s, 36H, BHT-*t*Bu), 1.82 (s, 3H, 6-H), 1.37 (m, 7H,  $\text{CH}_3$  and CH of *i*Bu), 0.90 (m, 16H, *i*Pr and  $\text{CH}_2$  of *i*Bu), 0.51 (t,  $^3J_{\text{HH}} = 7.3$  Hz, 3H, 4-H).  $^{31}\text{P}\{^1\text{H}\}$  NMR (162 MHz,  $\text{C}_6\text{D}_6$ , 298 K)  $\delta$  (ppm) = 42.5 (s).

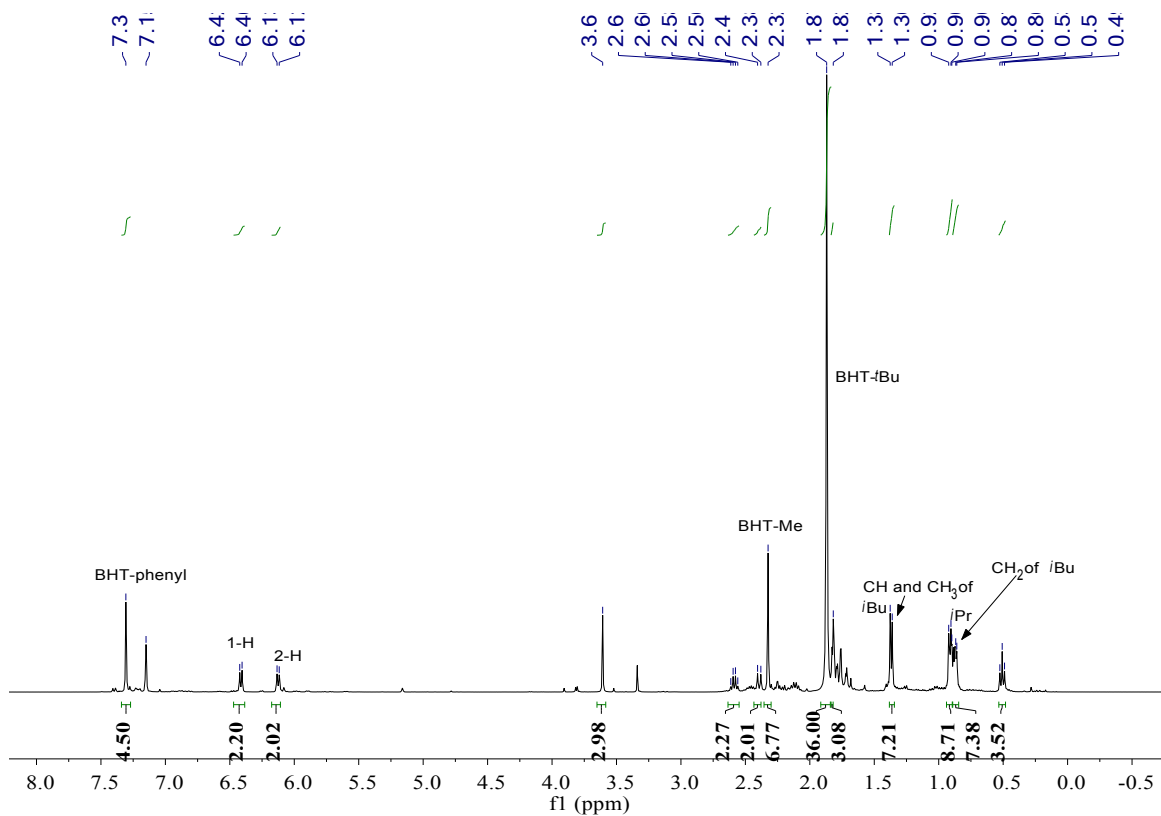

**Figure S52.**  $^1\text{H}$  NMR spectrum for reaction of  $\text{PyAP-}^i\text{Pr}$  with  $^i\text{BuAl}(\text{BHT})_2\cdot\text{MMA}$  (400 MHz,  $\text{C}_6\text{D}_6$ , 298 K) (10:1 mixture of isomer, only the major isomer was marked for clarity).

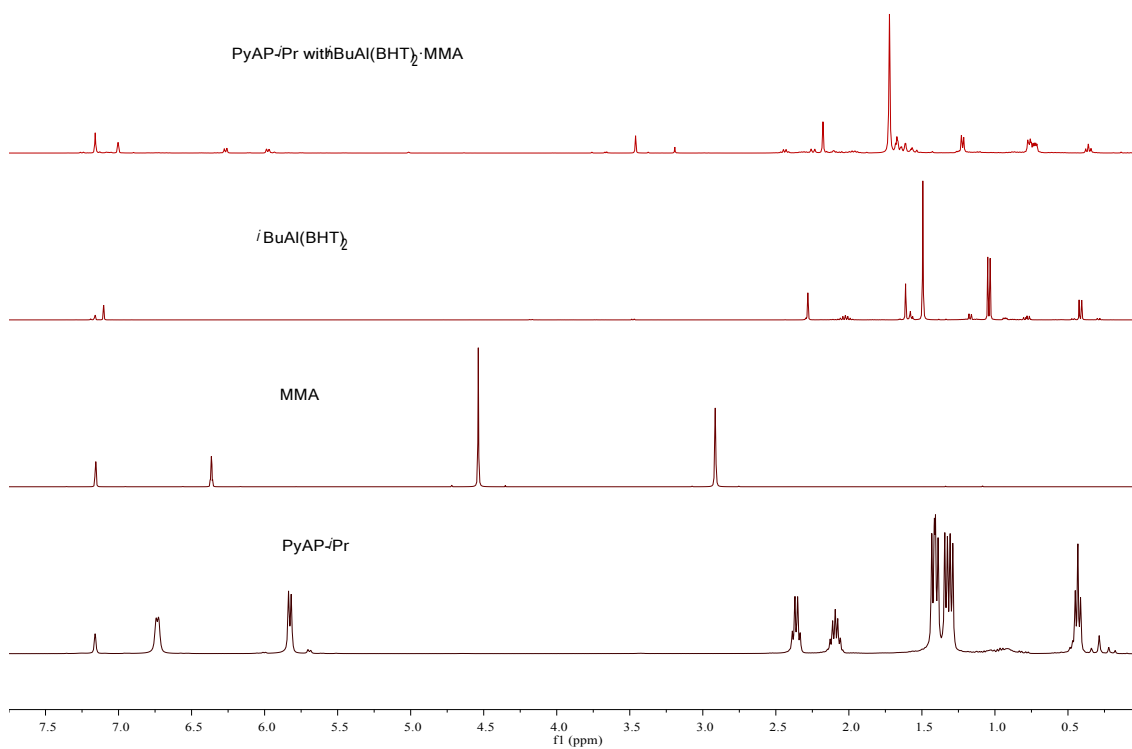

**Figure S53.** Stacked <sup>1</sup>H NMR spectra for reaction of PyAP-*i*Pr with <sup>i</sup>BuAl(BHT)<sub>2</sub>·MMA (400 MHz, C<sub>6</sub>D<sub>6</sub>, 298 K)

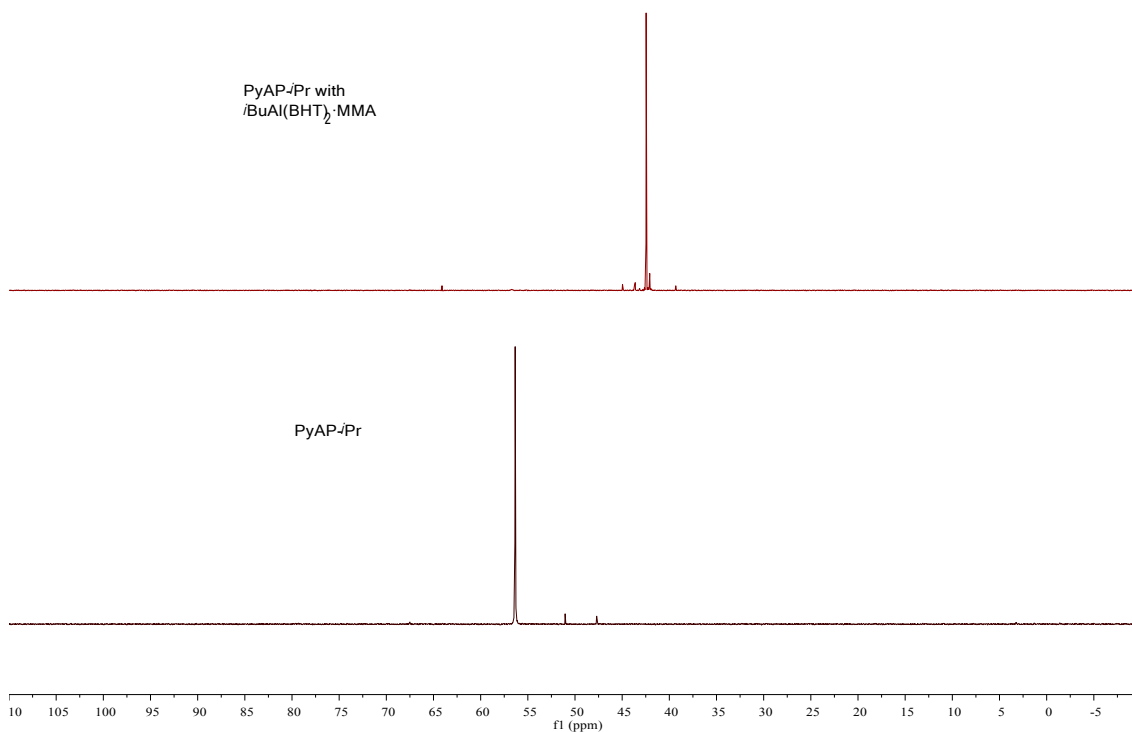

**Figure S54.**  $^{31}\text{P}\{^1\text{H}\}$  NMR spectrum for reaction of PyAP-*i*Pr with  $i\text{BuAl}(\text{BHT})_2 \cdot \text{MMA}$  (162 MHz,  $\text{C}_6\text{D}_6$ , 298 K)

### 2.18 Stoichiometric NMR Reaction of PyAP-Ph with $i\text{BuAl}(\text{BHT})_2 \cdot \text{MMA}$ in a 1:1 molar ratio

In an argon-filled glovebox, a NMR tube was charged with 12.3 mg (0.04 mmol) of  $\text{P}^i\text{Ph}_2$  and 0.3 mL of  $\text{C}_6\text{D}_6$ . A 0.3 mL  $\text{C}_6\text{D}_6$  solution of  $i\text{BuAl}(\text{BHT})_2$  (20.9 mg, 0.04 mmol) and 4.2  $\mu\text{L}$  MMA (0.04 mmol) were slowly added to this tube via pipet at room temperature. The mixture was allowed to react for 5 min at room temperature before the NMR spectra were recorded. Zwitterionic enolaluminate was generated as two isomers (E/Z = 5:3). Only the major isomer was analyzed.

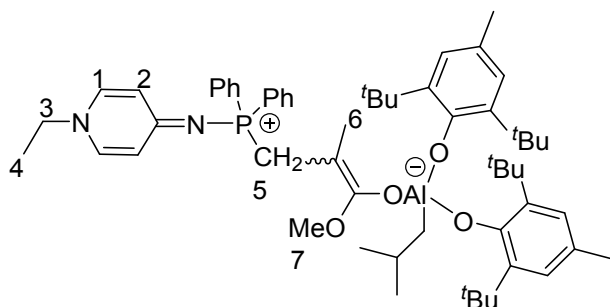

$^1\text{H}$  NMR (400 MHz,  $\text{C}_6\text{D}_6$ , 298 K)  $\delta$  (ppm) = 7.26 (s, 4H, BHT-phenyl), 7.06 (m, 10H, Ph), 6.33 (d, 2H,  $^3J_{\text{HH}} = 7.3$  Hz, 1-H), 6.07 (d, 2H,  $^3J_{\text{HH}} = 6.3$  Hz, 2-H), 3.40 (s, 3H, 7-H), 2.53 (q,  $^3J_{\text{HH}} = 7.3$  Hz, 2H, 3-H), 2.31 (s, 6H, BHT-Me), 2.26 (d,  $^2J_{\text{PH}} = 9.1$  Hz, 2H, 5-H), 1.84 (s, 39H, BHT- $t$ Bu), 1.72 (s, 3H, 6-H), 1.30 (m, 7H, CH and  $\text{CH}_3$  of  $t$ Bu), 0.48 (t,  $^3J_{\text{HH}} = 7.3$  Hz, 3H, 4-H),  $\text{CH}_2$  of  $t$ Bu were not assigned due to the overlapping.  $^{31}\text{P}$   $\{^1\text{H}\}$  NMR (162 MHz,  $\text{C}_6\text{D}_6$ , 298 K)  $\delta$  (ppm) = 13.4 (s).

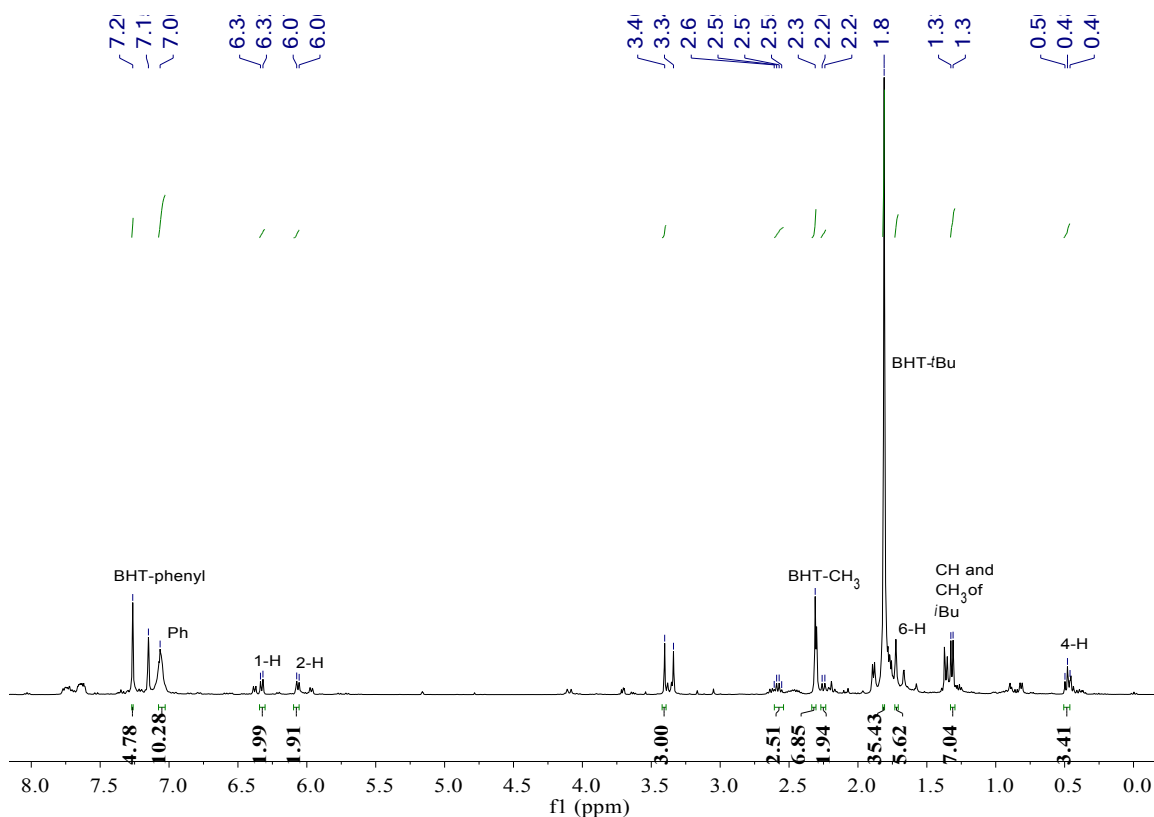

**Figure S55.**  $^1\text{H}$  NMR spectrum for reaction of PyAP-Ph with  $t$ BuAl(BHT) $_2$ ·MMA (400 MHz,  $\text{C}_6\text{D}_6$ , 298 K) (5:3 mixture of isomer, only the major isomer was marked for clarity).

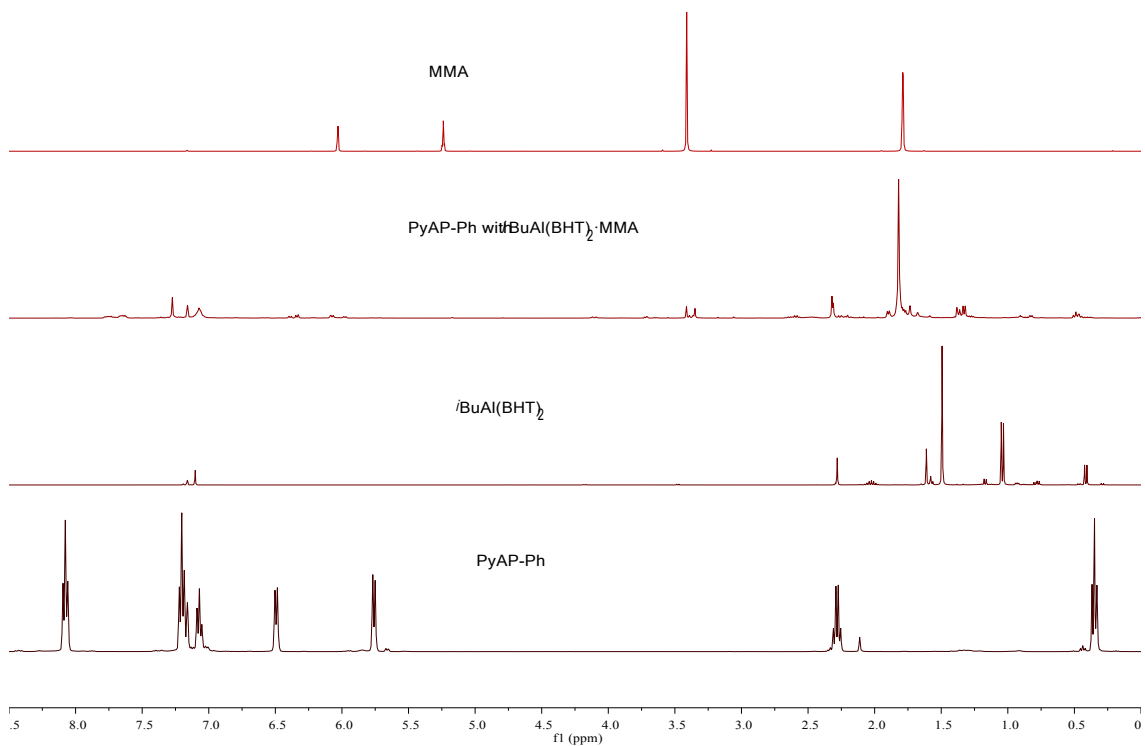

**Figure S56.** Stacked  $^1\text{H}$  NMR spectra for reaction of PyAP-Ph with  $t\text{BuAl(BHT)}_2 \cdot \text{MMA}$  (400 MHz,  $\text{C}_6\text{D}_6$ , 298 K)

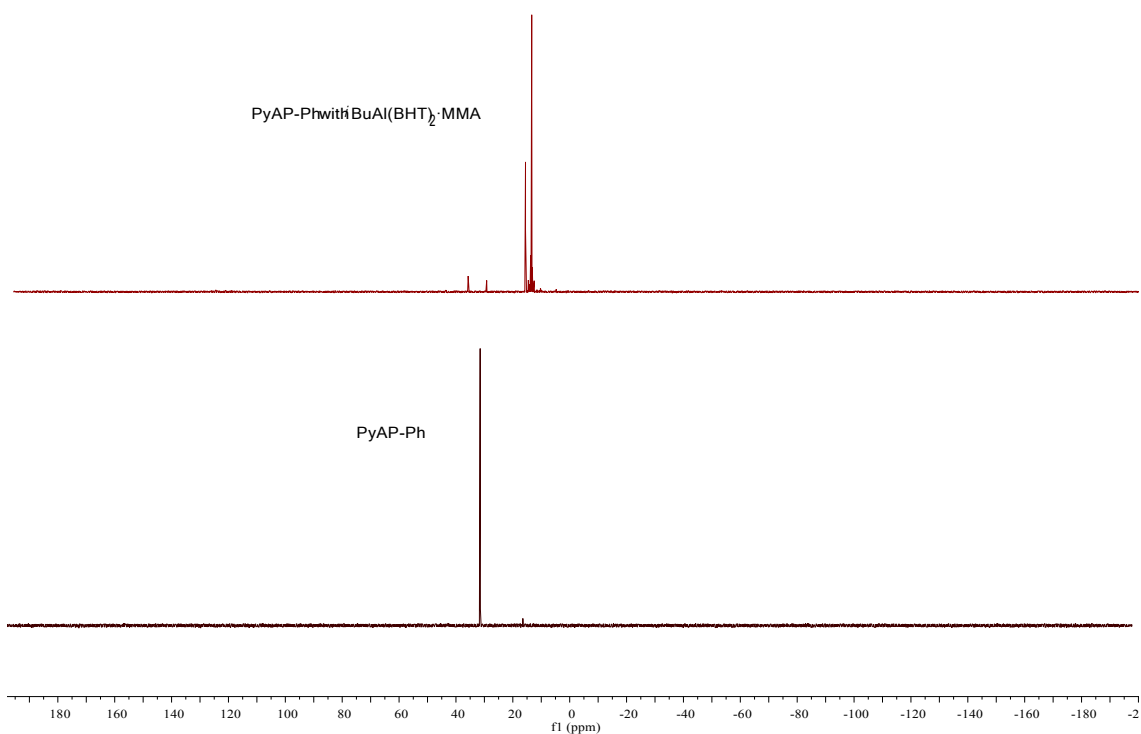

**Figure S57.**  $^{31}\text{P}\{^1\text{H}\}$  NMR spectrum for reaction of PyAP-Ph with  $t\text{BuAl}(\text{BHT})_2\cdot\text{MMA}$  (162 MHz,  $\text{C}_6\text{D}_6$ , 298 K)

### 3. Additional Polymerization Data

**Table S1 Control Experiments of MMA Polymerization Catalyzed by PyAPs**

| Run <sup>a</sup> | LB                 | Conv.<br><sup>b</sup><br>(%) | $M_n^c$<br>( $\text{g}\cdot\text{mol}^{-1}$ ) | $M_{n(\text{calcd})}$<br>( $\text{g}\cdot\text{mol}^{-1}$ ) | $\bar{D}$<br>( $M_w/M_n$ ) |
|------------------|--------------------|------------------------------|-----------------------------------------------|-------------------------------------------------------------|----------------------------|
| 1                | PyAP- $t\text{Bu}$ | 0                            | -                                             | -                                                           | -                          |
| 2                | PyAP-Cy            | 0                            | -                                             | -                                                           | -                          |
| 3                | PyAP- $i\text{Pr}$ | 0                            | -                                             | -                                                           | -                          |
| 4                | PyAP-Ph            | 0                            | -                                             | -                                                           | -                          |

<sup>a</sup>Condition: The polymerization was carried out at ambient temperature in 4.6 mL of toluene using the following procedure: for a 200 MMA/1 LB molar ratio,  $[\text{MMA}]_0 =$



0.941 M (4.8 mmol) and [LB]<sub>0</sub> = 9.4 mM (0.048 mmol).

**Table S2 Different Procedures in MMA Polymerization Catalyzed by PyAP-*i*Pr and Organoaluminium Lewis Acids**

| Ru<br>n <sup>a</sup> | LB : LA:M                                                     | Con<br>v. <sup>b</sup><br>(%) | selectivity |          |         | M <sub>n</sub> <sup>c</sup><br>(g·mol <sup>-1</sup> ) | M <sub>n</sub> (calcd)<br>(g·mol <sup>-1</sup> ) | Đ<br>(M <sub>w</sub> /<br>M <sub>n</sub> ) | I* <sup>d</sup> (<br>%) |
|----------------------|---------------------------------------------------------------|-------------------------------|-------------|----------|---------|-------------------------------------------------------|--------------------------------------------------|--------------------------------------------|-------------------------|
|                      |                                                               |                               | rr          | mr       | m<br>m  |                                                       |                                                  |                                            |                         |
| 1 <sup>e</sup>       | 1 :<br>2MeAl(BHT)<br>) <sub>2</sub> : 200                     | >99                           | 64.<br>9    | 31.<br>8 | 3.<br>3 | 35000                                                 | 20262                                            | 1.18                                       | 58                      |
| 2 <sup>f</sup>       | 1 :<br>2MeAl(BHT)<br>) <sub>2</sub> : 200                     | >99                           | 67.<br>1    | 29.<br>5 | 3.<br>4 | 45400                                                 | 20262                                            | 1.30                                       | 45                      |
| 3 <sup>e</sup>       | 1 :<br>2 <sup><i>i</i></sup> BuAl(BHT) <sub>2</sub><br>: 200  | >99                           | 67.<br>6    | 29.<br>1 | 3.<br>3 | 31200                                                 | 20262                                            | 1.21                                       | 65                      |
| 4 <sup>f</sup>       | 1 :<br>2 <sup><i>i</i></sup> BuAl(BHT) <sub>2</sub><br>: 200  | >99                           | 67.<br>6    | 29.<br>1 | 3.<br>3 | 39300                                                 | 20262                                            | 1.20                                       | 52                      |
| 5 <sup>e</sup>       | 1 :<br>2 <sup><i>i</i></sup> Bu <sub>2</sub> Al(BHT)<br>: 200 | >99                           | 60.<br>2    | 36.<br>1 | 3.<br>7 | 37900                                                 | 20262                                            | 1.17                                       | 54                      |
| 6 <sup>f</sup>       | 1 :<br>2 <sup><i>i</i></sup> Bu <sub>2</sub> Al(BHT)<br>: 200 | >99                           | 61.<br>7    | 34.<br>6 | 3.<br>7 | 39600                                                 | 20262                                            | 1.21                                       | 51                      |

<sup>a</sup>Condition: The polymerization was carried out at ambient temperature in 4.6 mL of toluene using the following procedure: for a 200 MMA/1 LB/2 LA ratio, [MMA]<sub>0</sub> = 0.941

M (4.8 mmol) and  $[LA]_0 = 2 [LB]_0 = 9.4 \text{ mM}$  (0.048 mmol). <sup>b</sup>Monomer conversions were measured by <sup>1</sup>H NMR. <sup>c</sup> $M_n$  and  $\bar{D}$  determined by GPC relative to PMMA standards in THF. <sup>d</sup>Initiation efficiency ( $I^*$ )% =  $M_{n(\text{calcd})}/M_{n(\text{exptl})} \times 100$ , where  $M_{n(\text{calcd})} = [M_w(\text{MMA})]([MMA]_0/[I]_0)(\text{conversion}) + M_w$  of chain end groups. e: procedure A: the LA and LB was premixed before the addition of MMA. f: procedure B: LA was premixed with MMA, followed by addition of LB.

**Table S3 Low Molecular Weight PMMA Experiments Used for Maldi -TOF Measurements**

| Run <sup>a</sup> | LB : LA:M                                                             | Conv. <sup>b</sup><br>(%) | Maldi -TOF                                                                                                 |
|------------------|-----------------------------------------------------------------------|---------------------------|------------------------------------------------------------------------------------------------------------|
| 1                | 1 PyAP- <sup>t</sup> Bu : 2MeAl(BHT) <sub>2</sub> : 25                | >99                       | Linear chain end<br>(controlled and<br>living)                                                             |
| 2                | 1 PyAP- <sup>t</sup> Bu : 2 <sup>t</sup> BuAl(BHT) <sub>2</sub> : 25  | >99                       | Chain end capped<br>with cyclization<br>(controlled)                                                       |
| 3                | 1 PyAP- <sup>t</sup> Bu : 2 <sup>t</sup> Bu <sub>2</sub> Al(BHT) : 25 | >99                       | Both Chain end<br>capped with<br>cyclization (major)<br>and linear chain end<br>(minor)                    |
| 4                | 1 PyAP-Cy : 2MeAl(BHT) <sub>2</sub> : 25                              | >99                       | Both Chain end<br>capped with<br>cyclization (minor)<br>and linear chain end<br>(major)(not<br>controlled) |
| 5                | 1 PyAP-Cy : 2 <sup>t</sup> BuAl(BHT) <sub>2</sub> : 25                | >99                       | Both Chain end                                                                                             |

|    |                                                                       |     |                                                                             |
|----|-----------------------------------------------------------------------|-----|-----------------------------------------------------------------------------|
|    |                                                                       |     | capped with cyclization (major) and linear chain end (minor)                |
| 6  | 1 PyAP-Cy : 2 <sup>t</sup> Bu <sub>2</sub> Al(BHT) : 25               | >99 | Chain end capped with cyclization (major) and unidentified species (minor)  |
| 7  | 1 PyAP- <sup>i</sup> Pr : 2MeAl(BHT) <sub>2</sub> : 25                | >99 | Both Chain end capped with cyclization (minor) and linear chain end (major) |
| 8  | 1 PyAP- <sup>i</sup> Pr : 2 <sup>t</sup> BuAl(BHT) <sub>2</sub> : 25  | >99 | Only chain end capped with cyclization was observed                         |
| 9  | 1 PyAP- <sup>i</sup> Pr : 2 <sup>t</sup> Bu <sub>2</sub> Al(BHT) : 25 | >99 | Chain end capped with cyclization (major) and tiny amount of other species  |
| 10 | 1 PyAP- Ph : 2MeAl(BHT) <sub>2</sub> : 25                             | >99 | Only chain end capped with cyclization                                      |
| 11 | 1 PyAP- Ph : 2 <sup>t</sup> BuAl(BHT) <sub>2</sub> : 25               | >99 | Chain end capped with cyclization                                           |

|    |                                                                                |     |                                                                                         |
|----|--------------------------------------------------------------------------------|-----|-----------------------------------------------------------------------------------------|
|    |                                                                                |     | (major) and<br>unidentified species<br>(minor)                                          |
| 12 | 1 PyAP-Ph : 2 <sup>t</sup> Bu <sub>2</sub> Al(BHT) : 25                        | >99 | Chain end capped<br>with cyclization and<br>unidentified species<br>(minor)             |
| 13 | 1 PyAP- <sup>t</sup> Bu: 2Al(C <sub>6</sub> F <sub>5</sub> ) <sub>3</sub> : 25 | >99 | Both Chain end<br>capped with<br>cyclization (major)<br>and linear chain end<br>(minor) |

<sup>a</sup>Condition: The polymerization was carried out at ambient temperature in 0.6 mL of toluene using the following procedure: for a 25 MMA/1 LB/2 LA ratio, [MMA]<sub>0</sub> = 0.936 M (0.6 mmol) and [LA]<sub>0</sub> = 2 [LB]<sub>0</sub> = 9.2 mM (0.048 mmol). <sup>b</sup>Monomer conversions measured by <sup>1</sup>H NMR. <sup>c</sup>M<sub>n</sub> and Đ determined by GPC relative to PMMA standards in THF. <sup>d</sup>Initiation efficiency (I\*)% = M<sub>n(calcd)</sub>/M<sub>n(exptl)</sub> × 100, where M<sub>n(calcd)</sub> = [M<sub>w</sub>(MMA)]([MMA]<sub>0</sub>/[I]<sub>0</sub>)(conversion) + M<sub>w</sub> of chain end groups. A: procedure A. B: procedure B.

**Table S4 MMA Polymerization by PyAP-<sup>t</sup>Bu/ MeAl(BHT)<sub>2</sub> LP in a molar ratio of MMA/PyAP-<sup>t</sup>Bu = 400/1**

| Run <sup>a</sup> | Time<br>(min) | LB : LA : M                                                   | Conv.<br><sup>b</sup><br>(%) | M <sub>n</sub> <sup>c</sup><br>(g·mol <sup>-1</sup> ) | M <sub>n(calcd)</sub><br>(g·mol <sup>-1</sup> ) | Đ<br>(M <sub>w</sub> /M <sub>n</sub> ) | I* <sup>d</sup> (%) |
|------------------|---------------|---------------------------------------------------------------|------------------------------|-------------------------------------------------------|-------------------------------------------------|----------------------------------------|---------------------|
| 1                | 1             | 1 PyAP- <sup>t</sup> Bu :<br>2MeAl(BHT) <sub>2</sub><br>: 400 | 18                           | 8700                                                  | 7475                                            | 1.10                                   | 86                  |

|    |     |                                  |      |       |       |      |     |
|----|-----|----------------------------------|------|-------|-------|------|-----|
|    |     | 1 PyAP- <i>t</i> Bu :            |      |       |       |      |     |
| 2  | 2   | 2MeAl(BHT) <sub>2</sub><br>: 400 | 25.9 | 10800 | 10639 | 1.22 | 99  |
|    |     | 1 PyAP- <i>t</i> Bu :            |      |       |       |      |     |
| 3  | 3   | 2MeAl(BHT) <sub>2</sub><br>: 400 | 33.8 | 14000 | 13803 | 1.12 | 99  |
|    |     | 1 PyAP- <i>t</i> Bu :            |      |       |       |      |     |
| 4  | 4.5 | 2MeAl(BHT) <sub>2</sub><br>: 400 | 39.1 | 16200 | 15925 | 1.13 | 98  |
|    |     | 1 PyAP- <i>t</i> Bu :            |      |       |       |      |     |
| 5  | 6   | 2MeAl(BHT) <sub>2</sub><br>: 400 | 46.8 | 19100 | 19009 | 1.20 | 100 |
|    |     | 1 PyAP- <i>t</i> Bu :            |      |       |       |      |     |
| 6  | 8   | 2MeAl(BHT) <sub>2</sub><br>: 400 | 57.1 | 21600 | 23134 | 1.25 | 107 |
|    |     | 1 PyAP- <i>t</i> Bu :            |      |       |       |      |     |
| 7  | 10  | 2MeAl(BHT) <sub>2</sub><br>: 400 | 63   | 25900 | 25497 | 1.15 | 98  |
|    |     | 1 PyAP- <i>t</i> Bu :            |      |       |       |      |     |
| 8  | 12  | 2MeAl(BHT) <sub>2</sub><br>: 400 | 70.6 | 29200 | 28540 | 1.17 | 98  |
|    |     | 1 PyAP- <i>t</i> Bu :            |      |       |       |      |     |
| 9  | 15  | 2MeAl(BHT) <sub>2</sub><br>: 400 | 88.9 | 32000 | 35869 | 1.16 | 112 |
|    |     | 1 PyAP- <i>t</i> Bu :            |      |       |       |      |     |
| 10 | 20  | 2MeAl(BHT) <sub>2</sub>          | 100  | 40700 | 40314 | 1.19 | 99  |

: 400

<sup>a</sup>Condition: The polymerization was carried out at ambient temperature in 9.2 mL of toluene using the following procedure: for a 400 MMA/1 LB/2 LA ratio,  $[MMA]_0 = 0.936 \text{ M}$  (0.6 mmol) and  $[LA]_0 = 2 [LB]_0 = 4.7 \text{ mM}$  (0.048 mmol). n.d.: not determined.

<sup>b</sup>Monomer conversions measured by <sup>1</sup>H NMR. <sup>c</sup> $M_n$  and  $\bar{D}$  determined by GPC relative to PMMA standards in THF. <sup>d</sup>Initiation efficiency ( $I^*$ )% =  $M_{n(\text{calcd})}/M_{n(\text{exptl})} \times 100$ , where  $M_{n(\text{calcd})} = [M_w(\text{MMA})]([MMA]_0/[I]_0)(\text{conversion}) + M_w$  of chain end groups.

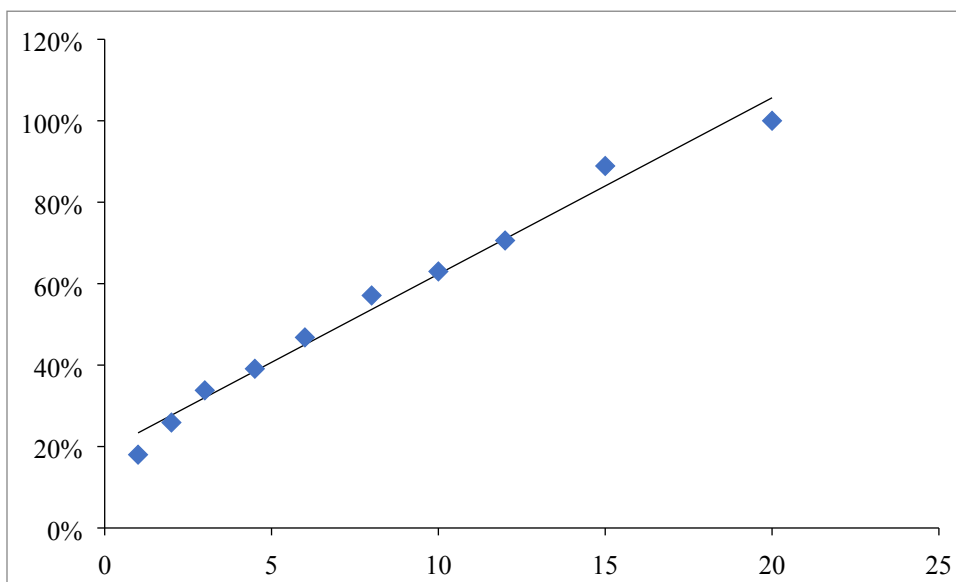

**Figure S58.** Plots of conversion of MMA vs time catalyzed by PyAP-tBu/MeAl(BHT)<sub>2</sub> at ambient temperature. Conditions:  $[MMA]_0/[PyAP-tBu]_0/[MeAl(BHT)_2]_0 = 400:1:2$ .

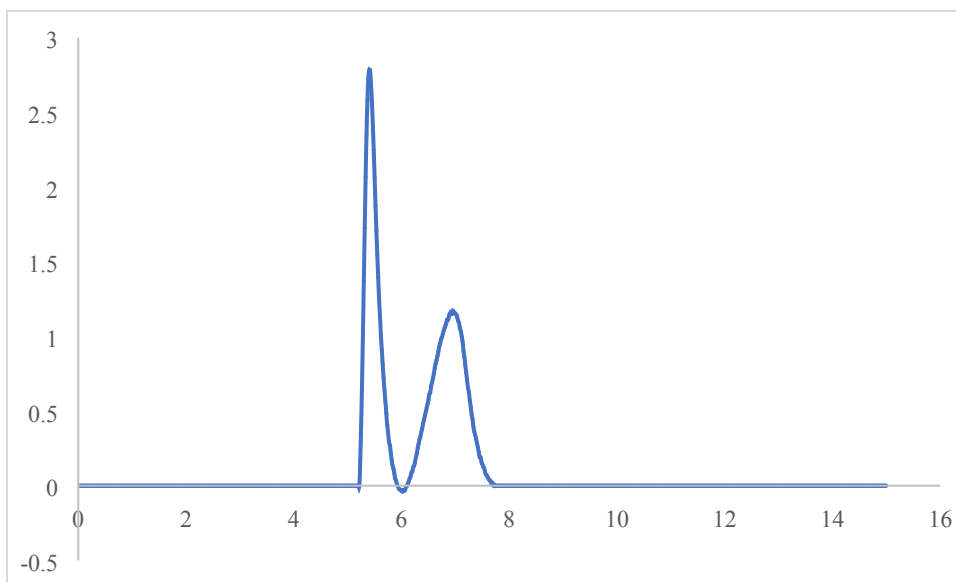

**Figure S59.** GPC traces of PMMA samples obtained by  $[MMA]_0/[PyAP-tBu]/[MeAl(BHT)_2]_0 = 3200:1:2$ .

**Table S5 PyAP-*t*Bu/MeAl(BHT)<sub>2</sub> LP-catalyzed *t*BA Polymerization**

| Run <sup>a</sup> | LB : LA: M  | Conv. <sup>b</sup><br>(%) | $M_n^c$<br>(g·mol <sup>-1</sup> ) | Đ ( $M_w/M_n$ ) |
|------------------|-------------|---------------------------|-----------------------------------|-----------------|
| 1                | 1 : 2 : 200 | 100                       | 40600                             | 1.30            |

<sup>a</sup>Condition: The polymerization was carried out at ambient temperature in 4.6 mL of toluene using the following procedure: for a 200 *t*BA /1 LB/2 LA ratio,  $[tBA]_0 = 0.936$  M (4.8 mmol) and  $[LA]_0 = 2 [LB]_0 = 9.4$  mM (0.048 mmol). <sup>b</sup>Monomer conversions measured by <sup>1</sup>H NMR. <sup>c</sup> $M_n$  and Đ determined by GPC relative to PMMA standards in THF.

**Table S6 Copolymerization of MMA by PyAP-*t*Bu/MeAl(BHT)<sub>2</sub> system**

| Run <sup>a</sup> | M1/M2/M3                | Conv. <sup>b</sup><br>(%) | $M_n^c$<br>(g·mol <sup>-1</sup> ) | Đ ( $M_w/M_n$ ) |
|------------------|-------------------------|---------------------------|-----------------------------------|-----------------|
| 1                | 200MMA/200 <i>t</i> BA  | MMA:>99                   | 22700                             | 1.20            |
|                  |                         | <i>t</i> BA:>99           | 49500                             | 1.50            |
| 2                | 200 <i>t</i> BA /200MMA | <i>t</i> BA:>99           | -                                 |                 |

<sup>a</sup>Condition: The polymerization was carried out at ambient temperature in 4.6 mL of toluene using the following procedure: for a 200 MMA /1 LB/2 LA ratio,  $[MMA]_0 = 0.936$  M (4.8 mmol) and  $[LA]_0 = 2 [LB]_0 = 9.4$  mM (0.048 mmol). The reaction mixture was stirred for 20 min, then a 200 <sup>t</sup>BA /1 LB/2 LA ratio, <sup>t</sup>BA (4.8 mmol) was added. n.d.: not determined. <sup>b</sup>Monomer conversions measured by <sup>1</sup>H NMR. <sup>c</sup> $M_n$  and  $\bar{D}$  determined by GPC relative to PMMA standards in THF. <sup>d</sup>Initiation efficiency ( $I^*$ )% =  $M_{n(\text{calcd})}/M_{n(\text{exptl})} \times 100$ , where  $M_{n(\text{calcd})} = [M_w(\text{<sup>t</sup>BA})]([\text{<sup>t</sup>BA}]_0/[\text{I}]_0)(\text{conversion}) + M_w$  of chain end groups.

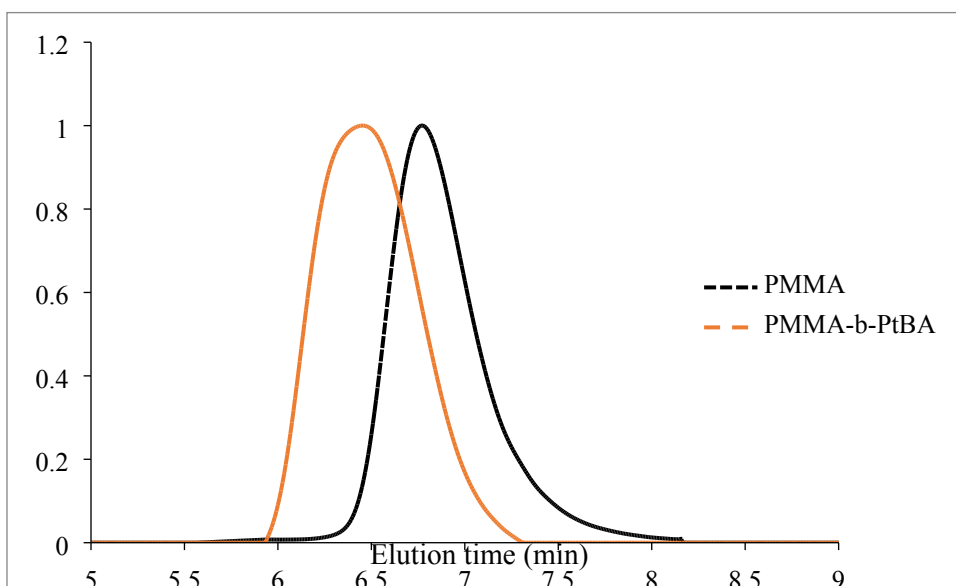

**Figure S60** GPC traces of homopolymer (black), diblock copolymer (orange) produced from the sequential block copolymerization of MMA and <sup>t</sup>BA by PyAP-<sup>t</sup>Bu/MeAl(BHT)<sub>2</sub> in toluene at ambient temperature.

#### 4 MALDI-TOF MS Spectra of Low $M_w$ PMMA

MALDI-TOF MS spectra of low- $M_w$  PMMA by PyAP-<sup>t</sup>Bu/Al(C<sub>6</sub>F<sub>5</sub>)<sub>3</sub>



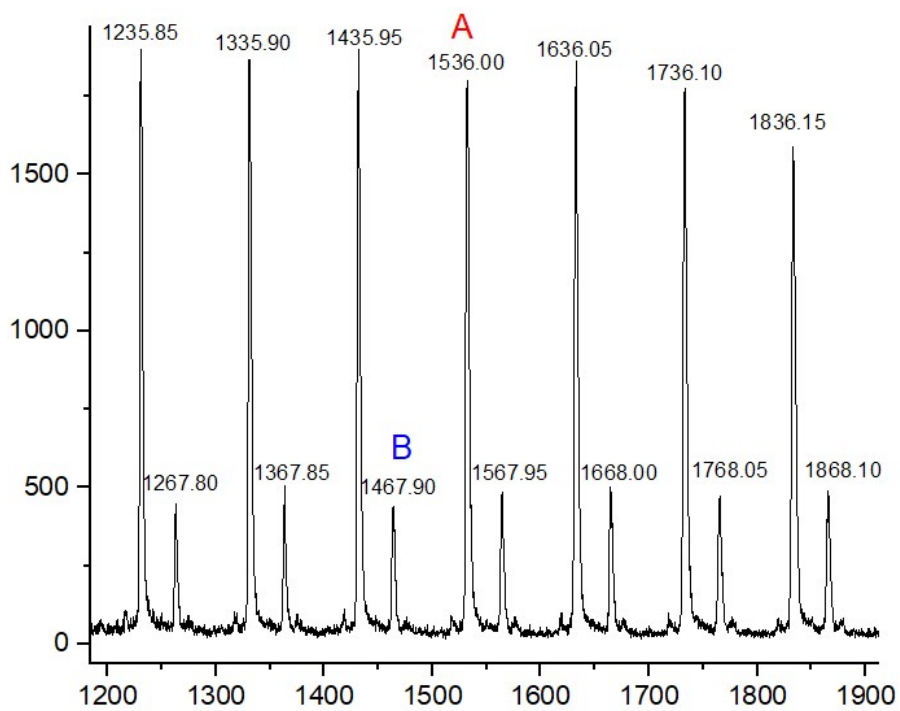

**Figure S61.** MALDI-TOF MS spectrum of the low- $M_w$  PMMA sample produced by PyAP- $t$ Bu/Al( $C_6F_5$ )<sub>3</sub> in toluene at ambient temperature

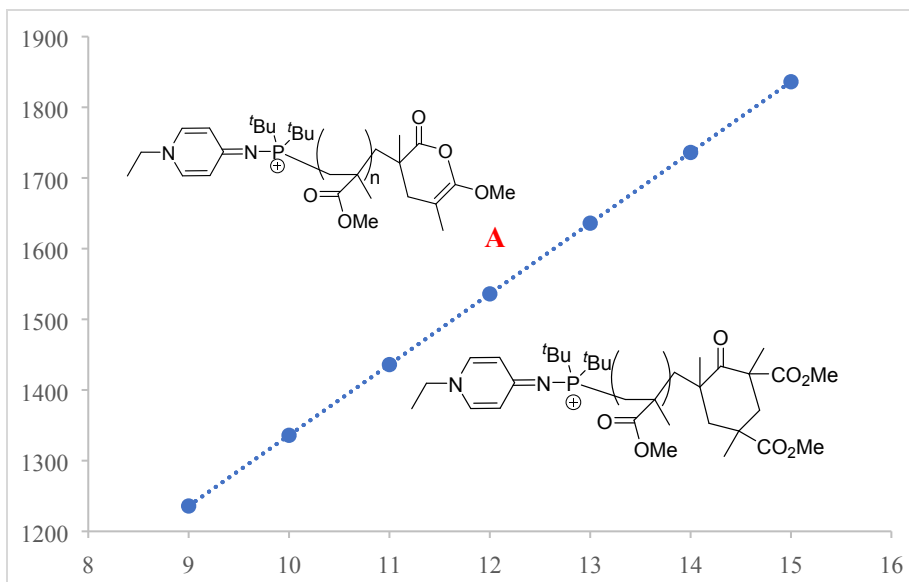

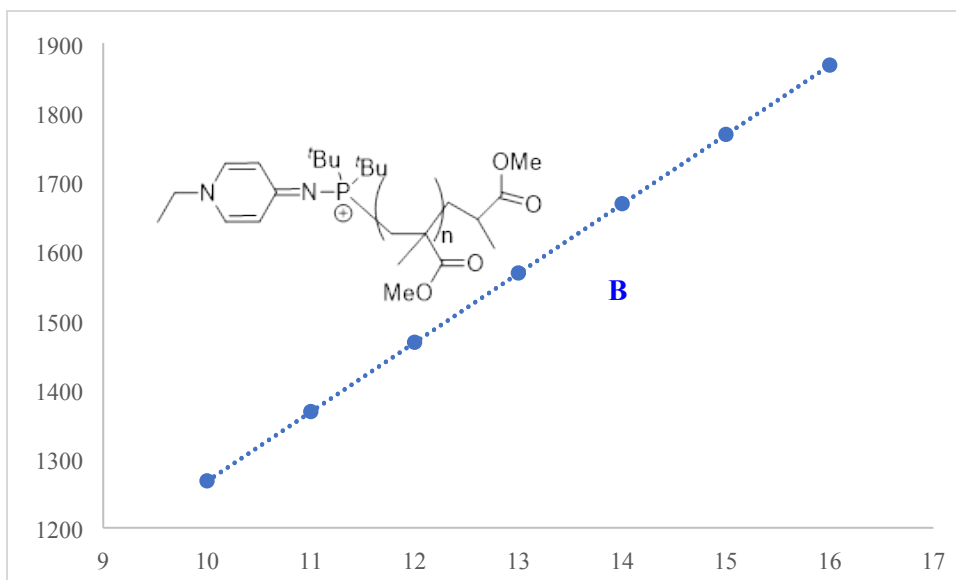

**Figure S62.** Plot of  $m/z$  values taken from Figure S61 vs the number of MMA repeat units ( $n$ ) and the deduced corresponding polymer chain structure produced by PyAP- $t$ Bu/ $Al(C_6F_5)_3$ , upper: major peaks **A**, bottom: minor peaks **B**.

#### MALDI-TOF MS spectra of low- $M_w$ PMMA by PyAP- $t$ Bu/ $MeAl(BHT)_2$

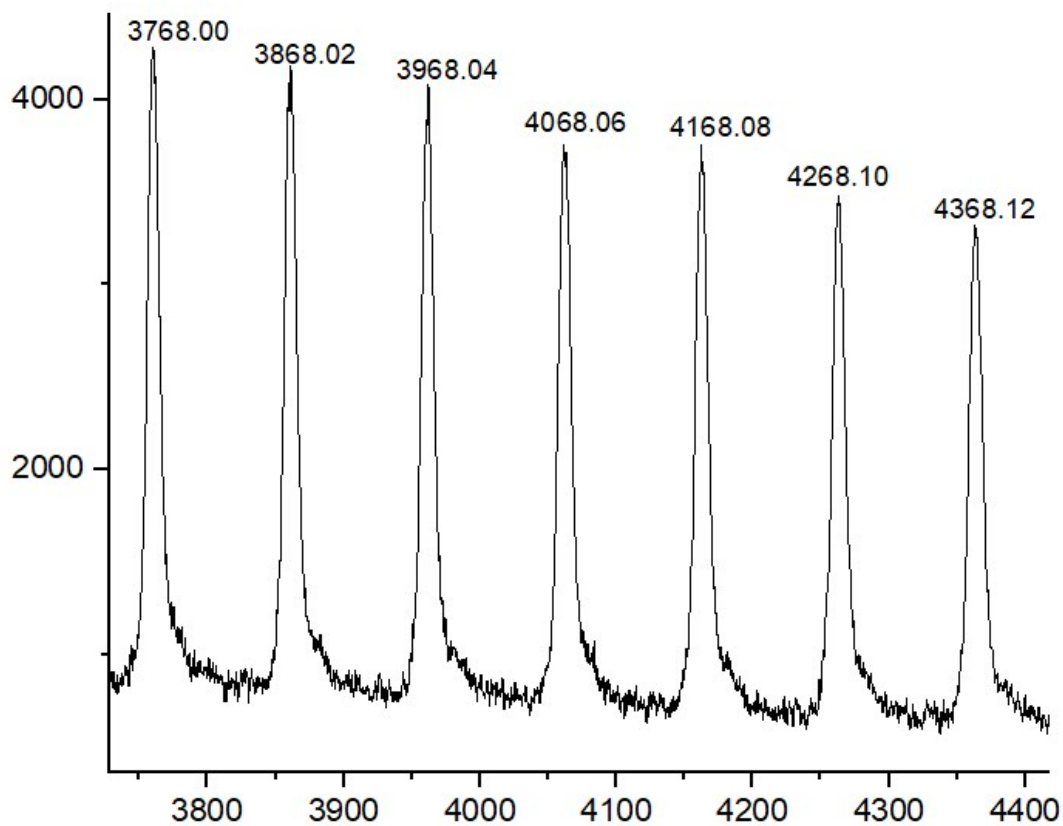

**Figure S63.** MALDI-TOF MS spectrum of the low- $M_w$  PMMA sample produced by PyAP- $^t$ Bu/MeAl(BHT) $_2$  in toluene at ambient temperature

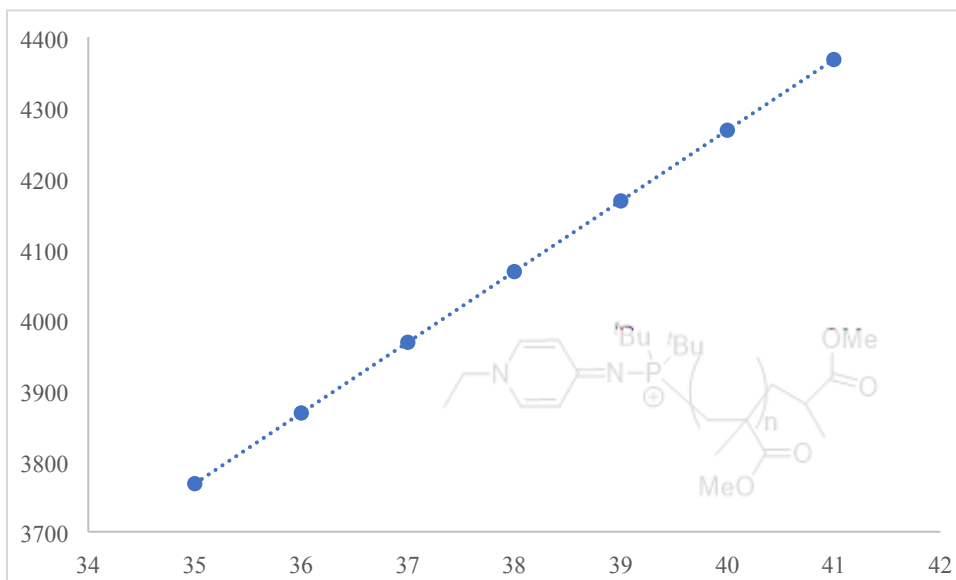

**Figure S64.** Plot of m/z values taken from Figure S63 vs the number of MMA repeat units (n) and the deduced corresponding polymer chain structure produced by PyAP- $^t$ Bu/MeAl(BHT) $_2$ .

**MALDI-TOF MS spectra of low- $M_w$  PMMA by PyAP- $^t$ Bu/ $^t$ BuAl(BHT) $_2$**

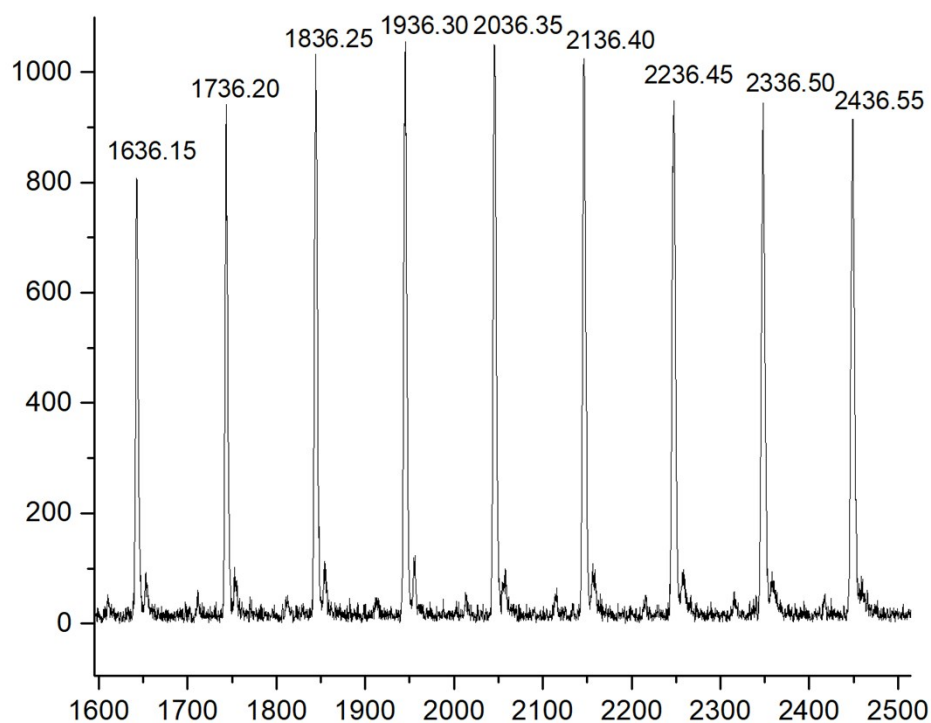

**Figure S65.** MALDI-TOF MS spectrum of the low- $M_w$  PMMA sample produced by

PyAP-*t*Bu/*i*BuAl(BHT)<sub>2</sub> in toluene at ambient temperature

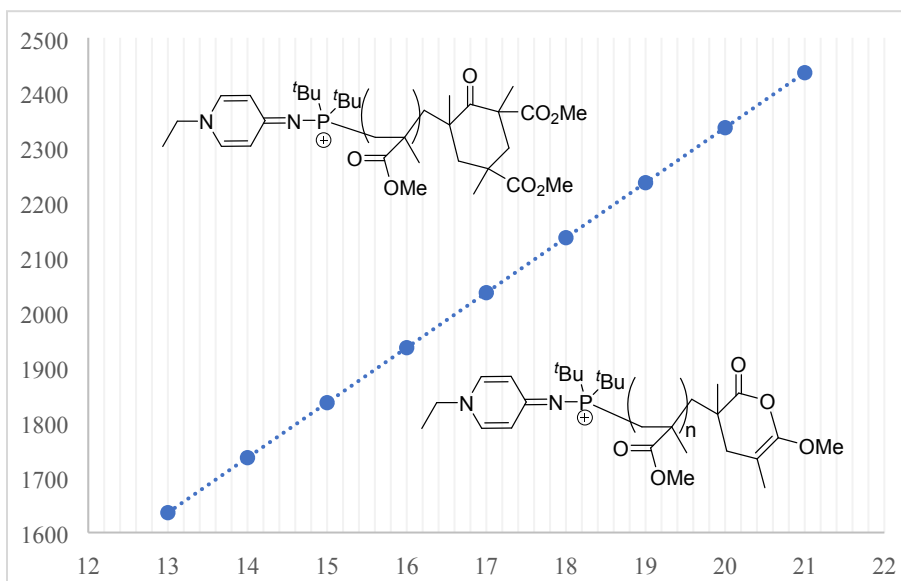

**Figure S66.** Plot of *m/z* values taken from Figure S65 vs the number of MMA repeat units (*n*) and the deduced corresponding polymer chain structure produced by PyAP-*t*Bu/*i*BuAl(BHT)<sub>2</sub>.

**MALDI-TOF MS spectra of low-*M<sub>w</sub>* PMMA by PyAP-*t*Bu/*i*Bu<sub>2</sub>AlBHT**

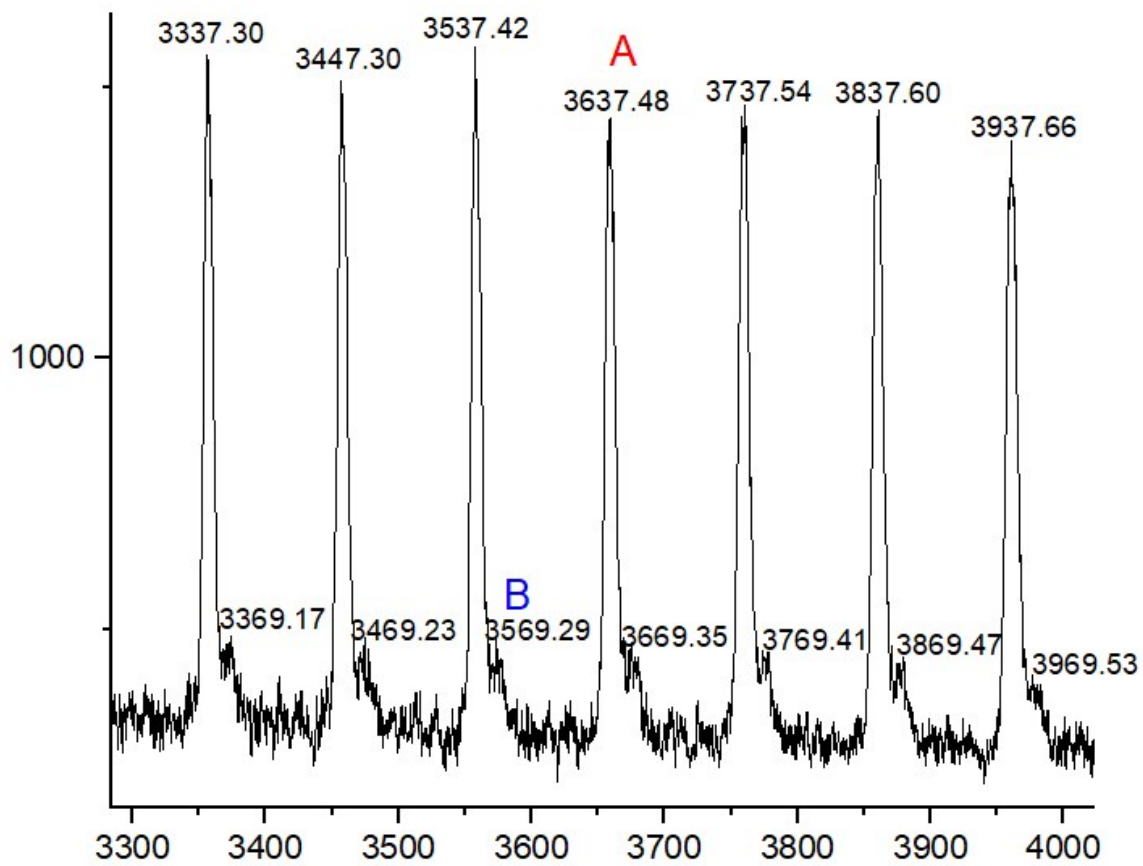

**Figure S67.** MALDI-TOF MS spectrum of the low- $M_w$  PMMA sample produced by PyAP- $t$ Bu/ $t$ Bu<sub>2</sub>AlBHT in toluene at ambient temperature

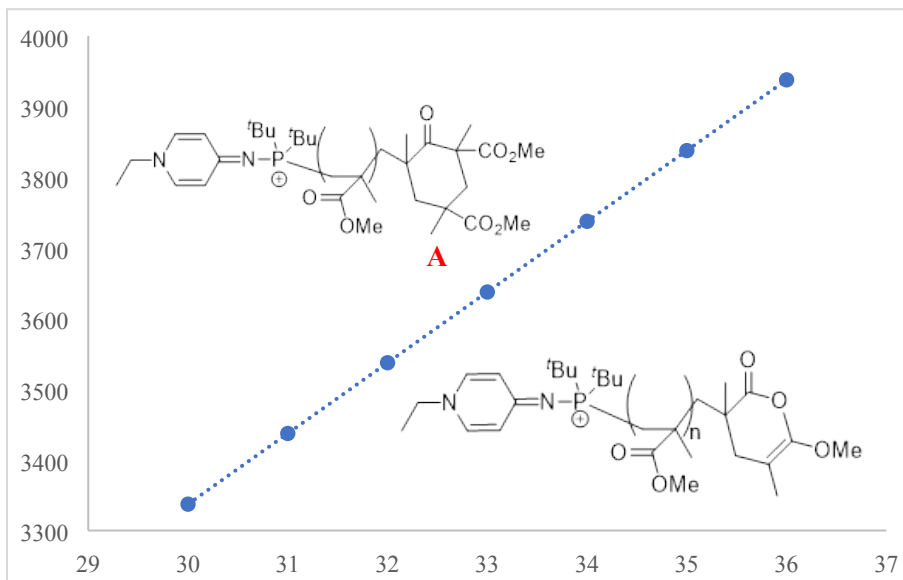

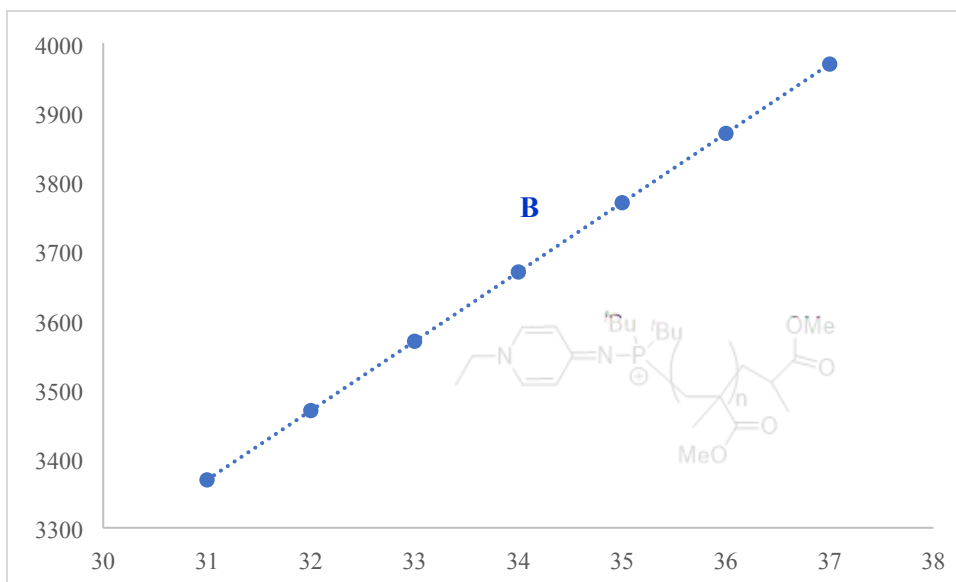

**Figure S68.** Plot of  $m/z$  values taken from Figure S67 vs the number of MMA repeat units ( $n$ ) and the deduced corresponding polymer chain structure produced by PyAP- $t$ Bu/ $i$ Bu<sub>2</sub>AlBHT, upper: major peaks (**A**), bottom: minor peaks (**B**).

**MALDI-TOF MS spectra of low- $M_w$  PMMA by PyAP-Cy/MeAl(BHT)<sub>2</sub>**

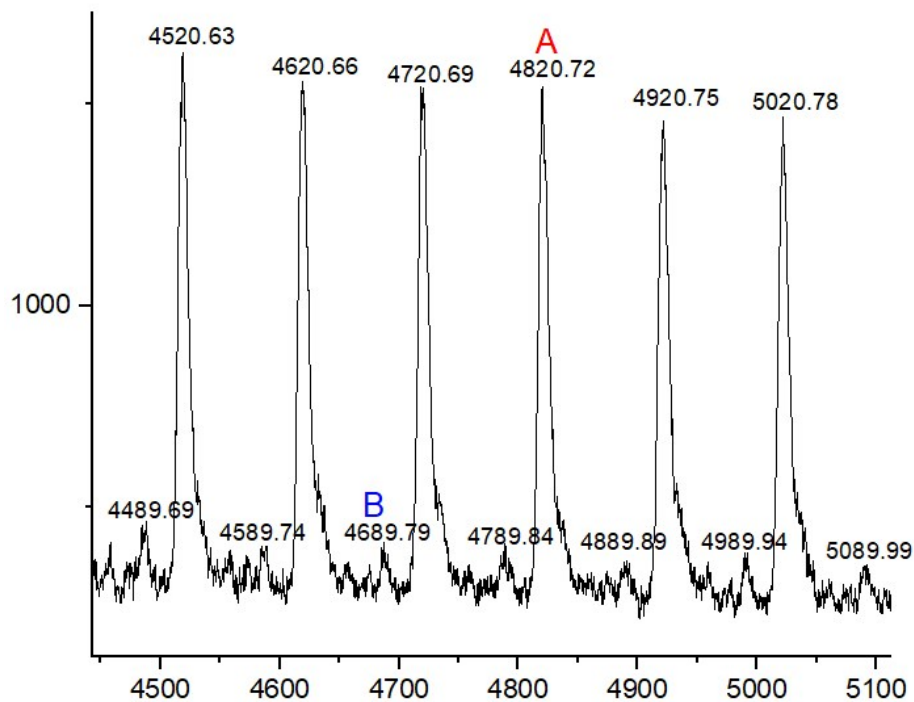

**Figure S69.** MALDI-TOF MS spectrum of the low- $M_w$  PMMA sample produced by PyAP-Cy/MeAl(BHT)<sub>2</sub> in toluene at ambient temperature

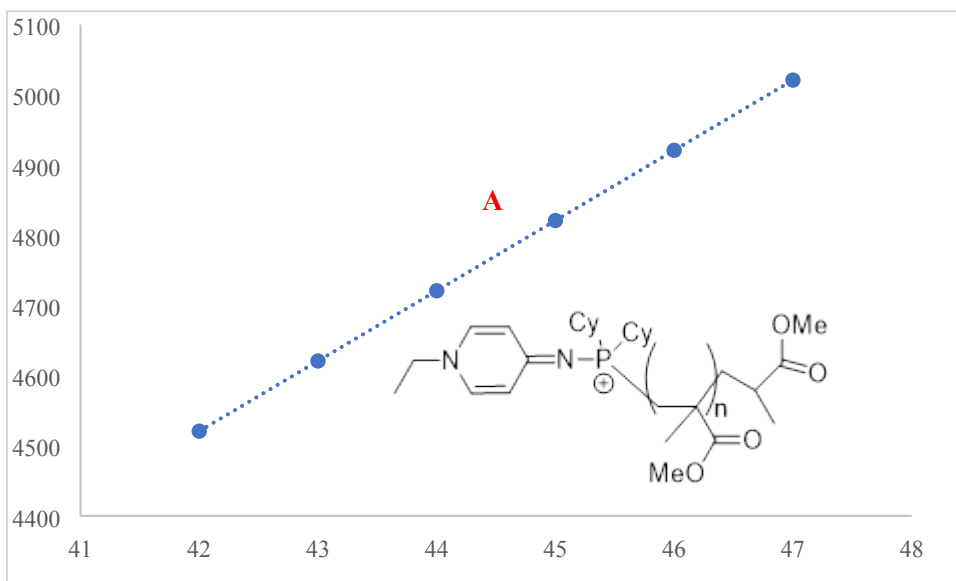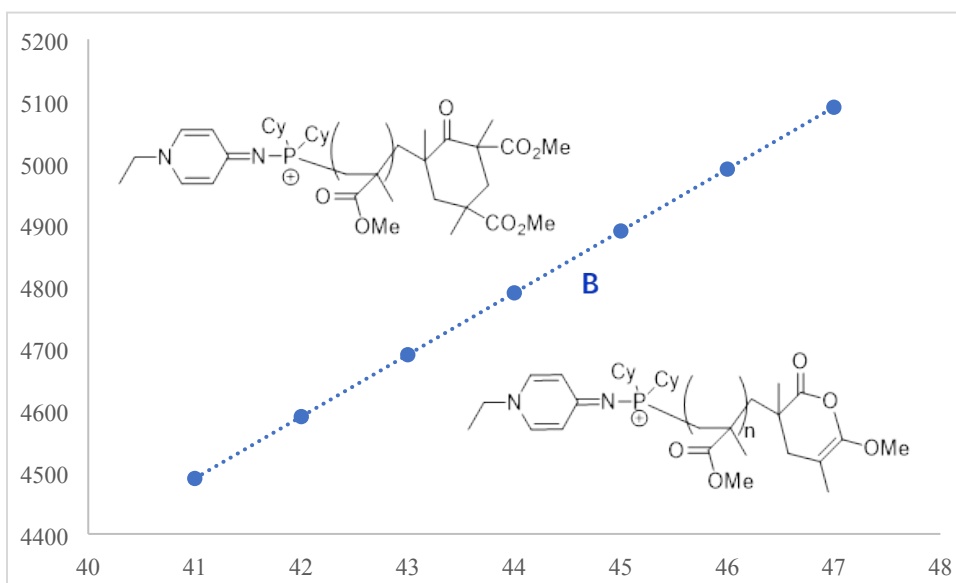

**Figure S70.** Plot of  $m/z$  values taken from Figure S69 vs the number of MMA repeat units ( $n$ ) and the deduced corresponding polymer chain structure produced by PyAP-Cy/MeAl(BHT)<sub>2</sub>, upper: major peaks (A), bottom: minor peaks (B).

**MALDI-TOF MS spectra of low- $M_w$  PMMA by PyAP-Cy/<sup>i</sup>BuAl(BHT)<sub>2</sub>**

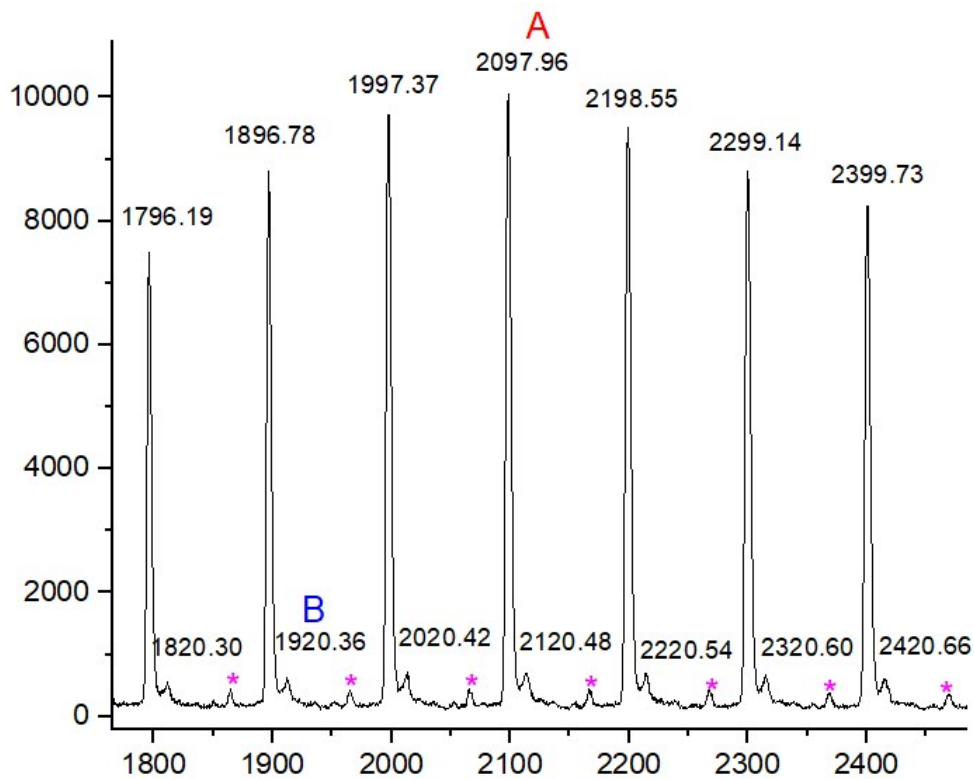

**Figure S71.** MALDI-TOF MS spectrum of the low- $M_w$  PMMA sample produced by PyAP-Cy/ $i$ BuAl(BHT) $_2$  in toluene at ambient temperature

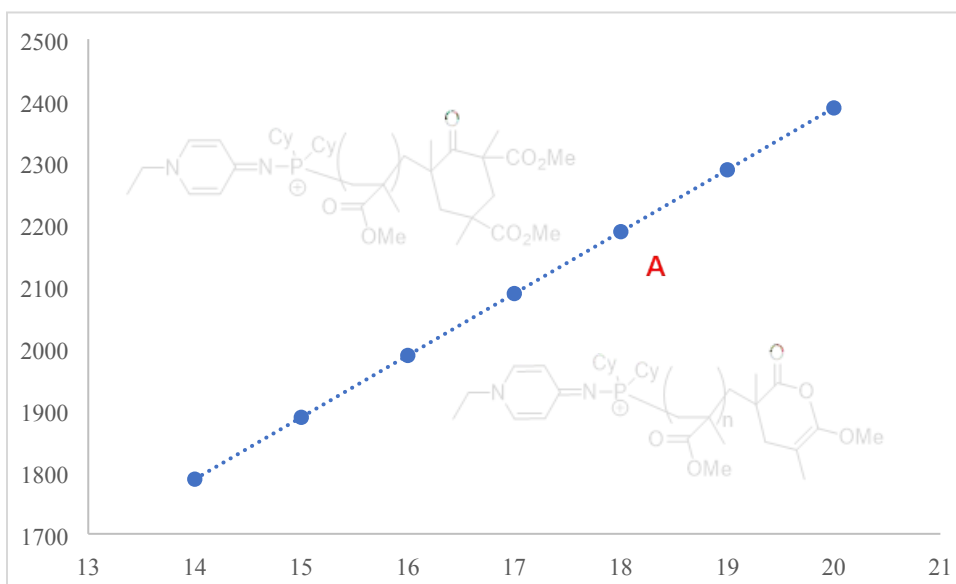



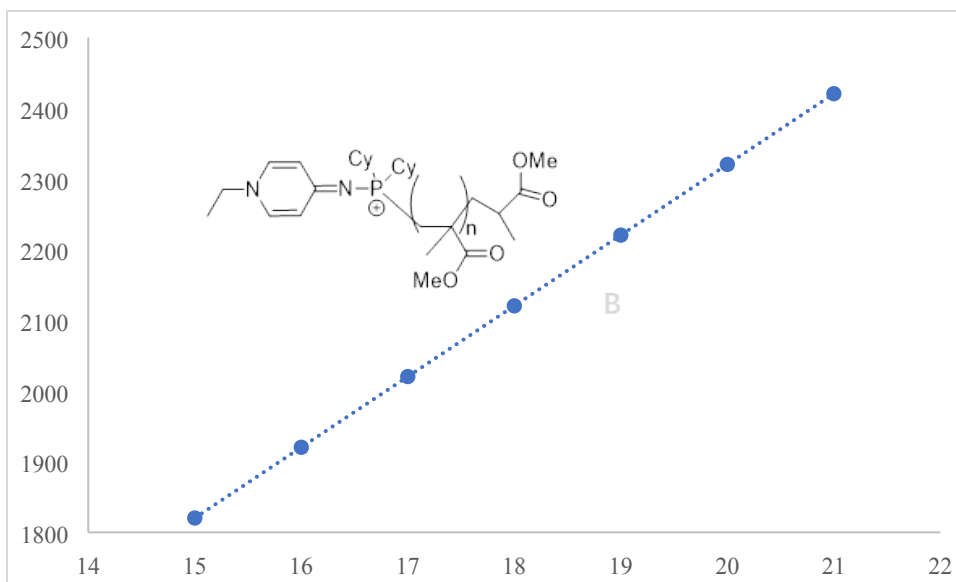

Pink(\*): unidentified species

**Figure S72.** Plot of m/z values taken from Figure S71 vs the number of MMA repeat units (n) and the deduced corresponding polymer chain structure produced by PyAP-Cy/<sup>i</sup>BuAl(BHT)<sub>2</sub>, upper: major peaks (A), bottom: minor peaks (B).

**MALDI-TOF MS spectra of low-M<sub>w</sub> PMMA by PyAP-Cy/<sup>i</sup>Bu<sub>2</sub>Al(BHT)**

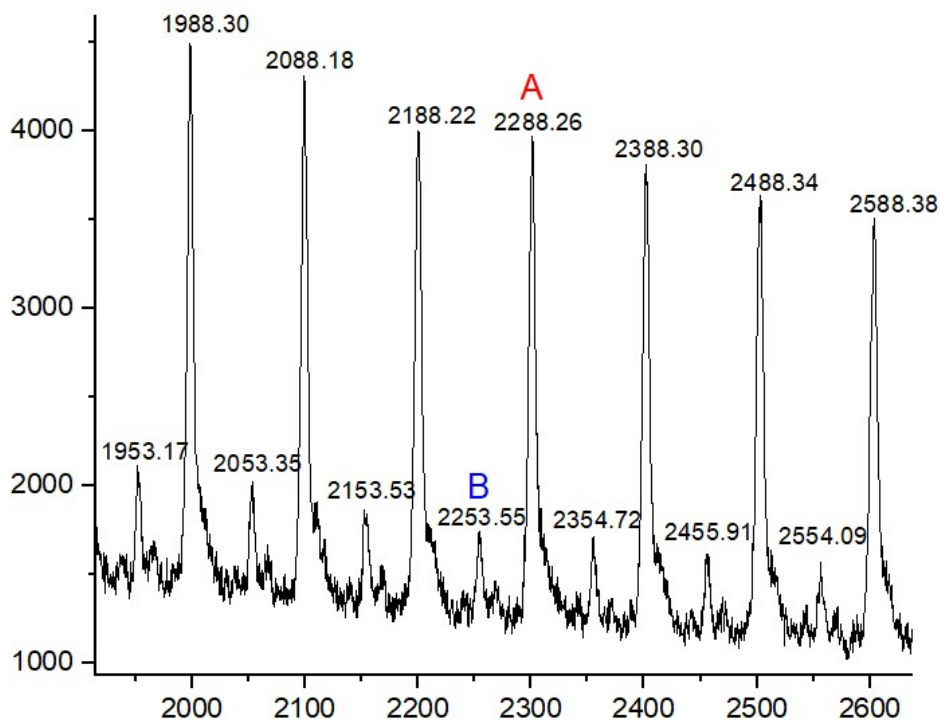

**Figure S73.** MALDI-TOF MS spectrum of the low-M<sub>w</sub> PMMA sample produced by PyAP-Cy/<sup>i</sup>Bu<sub>2</sub>Al(BHT) in toluene at ambient temperature

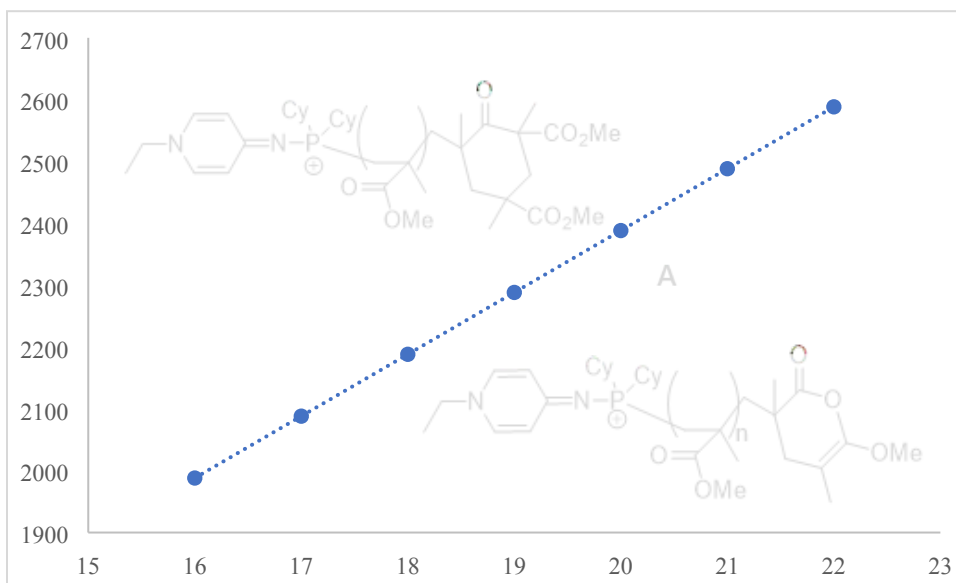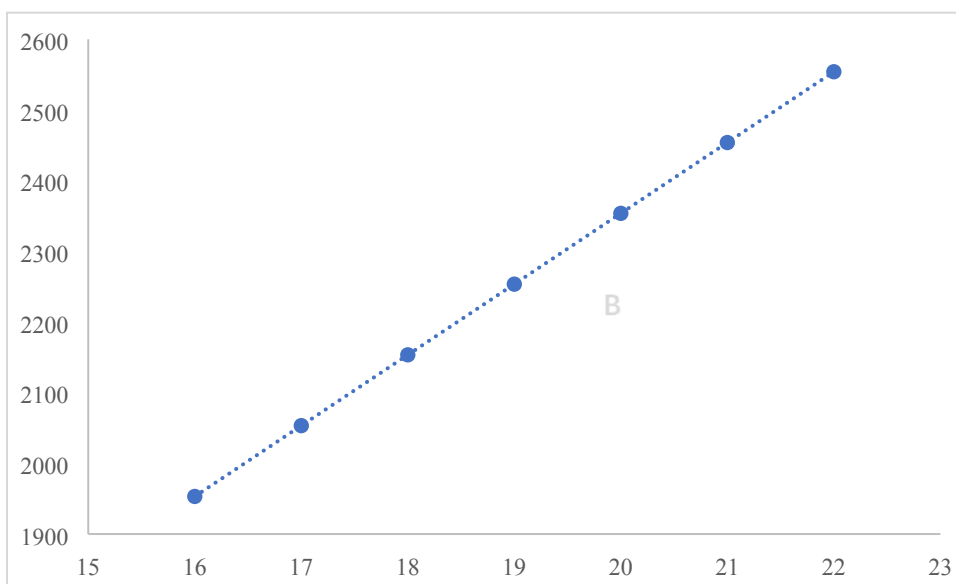

**Figure S74.** Plot of  $m/z$  values taken from Figure S73 vs the number of MMA repeat units ( $n$ ) and the deduced corresponding polymer chain structure produced by PyAP-Cy/ $i$ Bu<sub>2</sub>Al(BHT), upper: major peaks (**A**), bottom: minor peaks (**B**). Species B was not identified.

**MALDI-TOF MS spectra of low- $M_w$  PMMA by PyAP- $i$ Pr+MeAl(BHT)<sub>2</sub>**

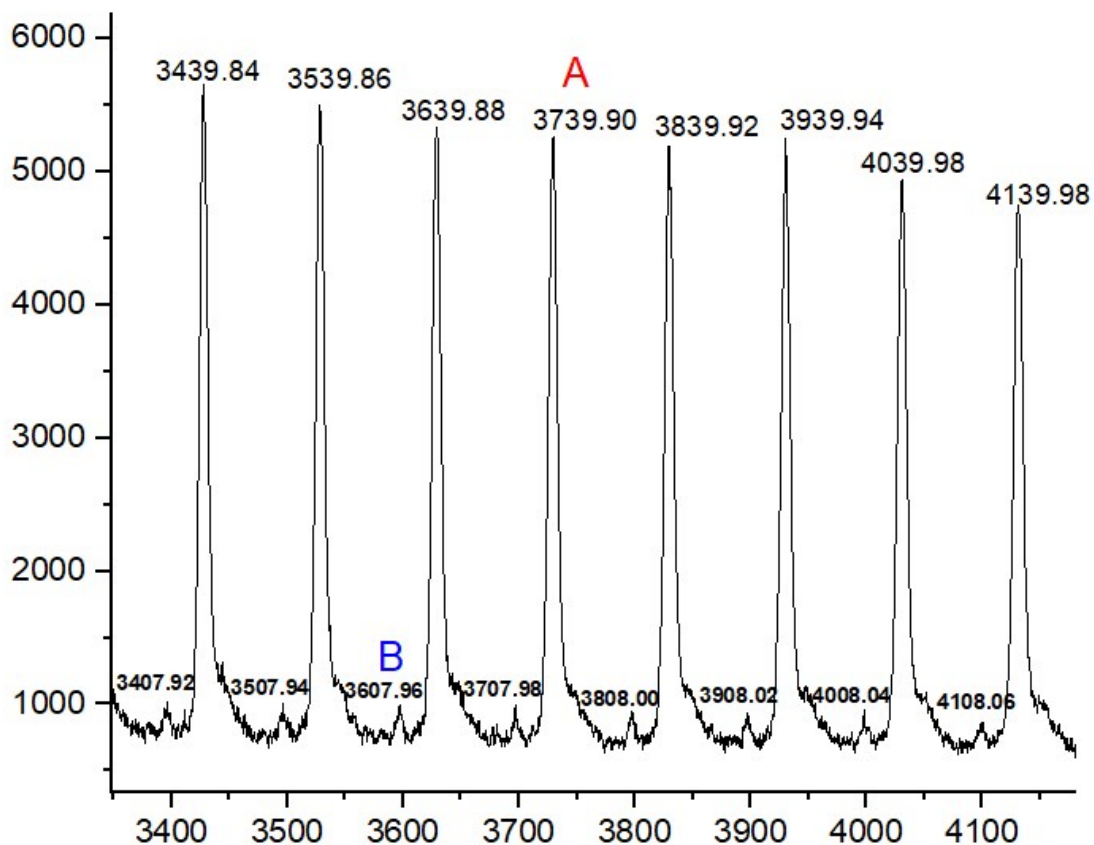

**Figure S75.** MALDI-TOF MS spectrum of the low- $M_w$  PMMA sample produced by  $\text{PyAP-}^i\text{Pr+MeAl(BHT)}_2$  in toluene at ambient temperature

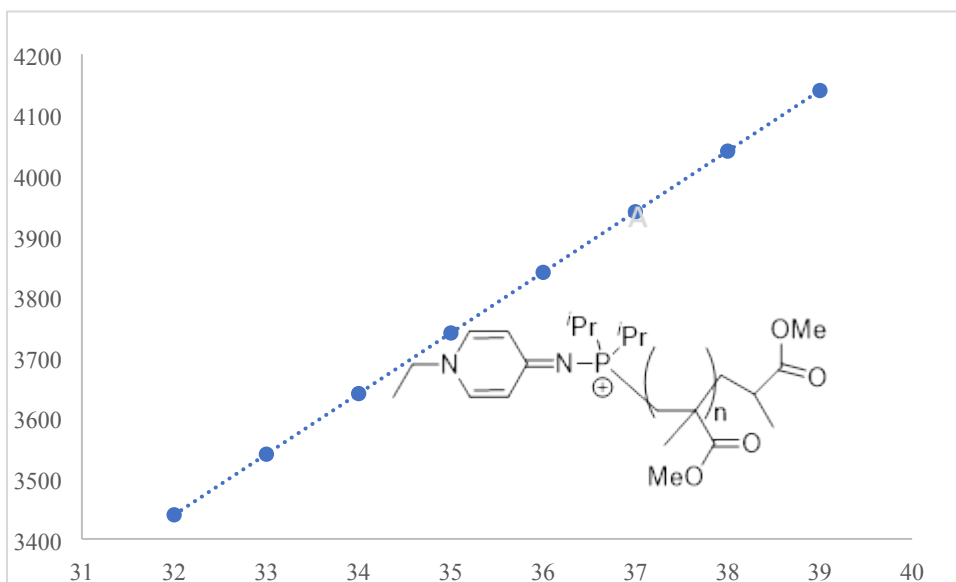

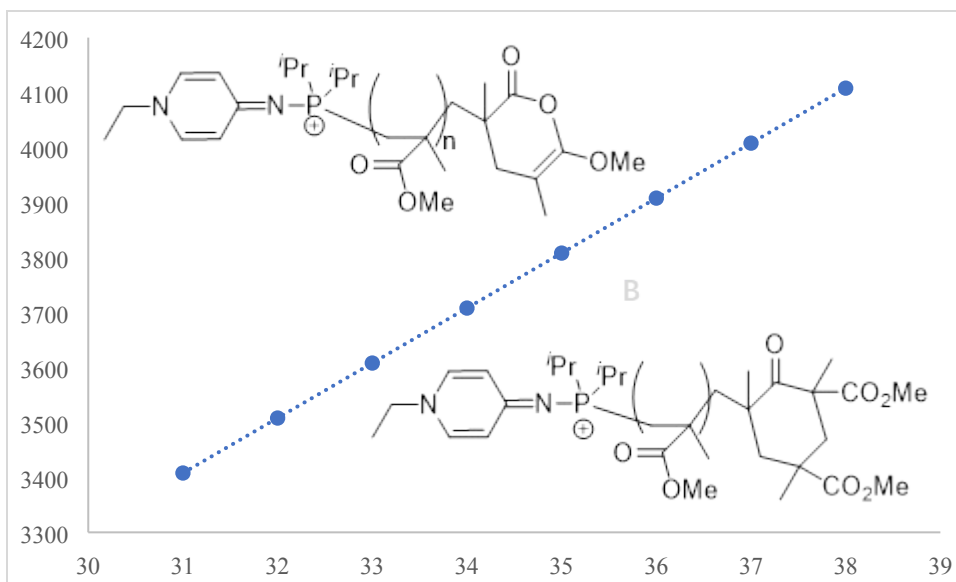

**Figure S76.** Plot of m/z values taken from Figure S75 vs the number of MMA repeat units (n) and the deduced corresponding polymer chain structure produced by PyAP-*i*Pr+MeAl(BHT)<sub>2</sub>, upper: major peaks (A), bottom: minor peaks (B).

**MALDI-TOF MS spectra of low-M<sub>w</sub> PMMA by PyAP-*i*Pr+*i*BuAl(BHT)<sub>2</sub>**

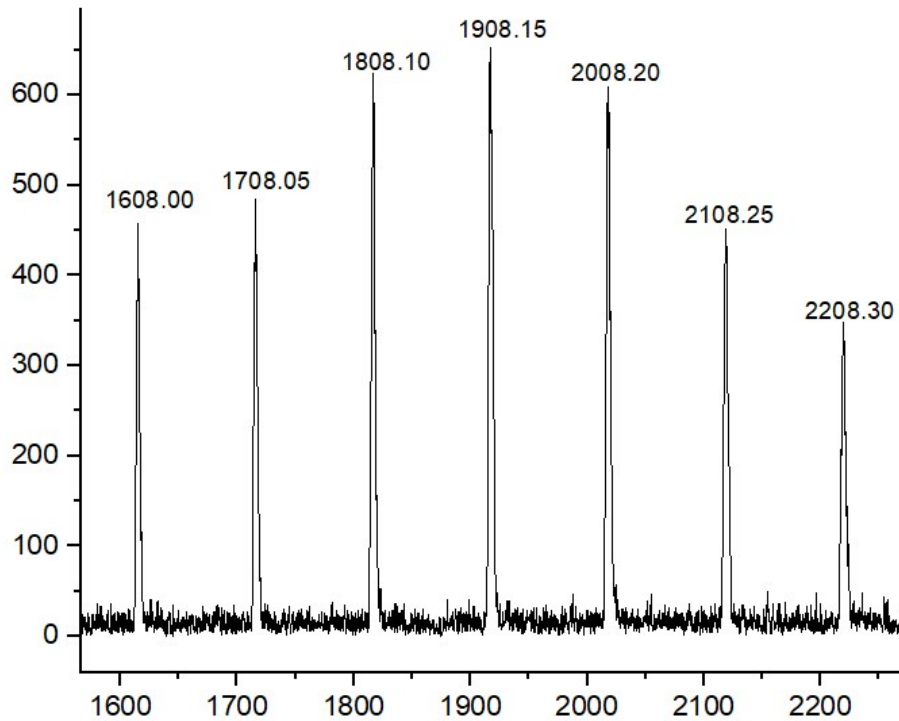

**Figure S77.** MALDI-TOF MS spectrum of the low-M<sub>w</sub> PMMA sample produced by PyAP-*i*Pr+*i*BuAl(BHT)<sub>2</sub> in toluene at ambient temperature

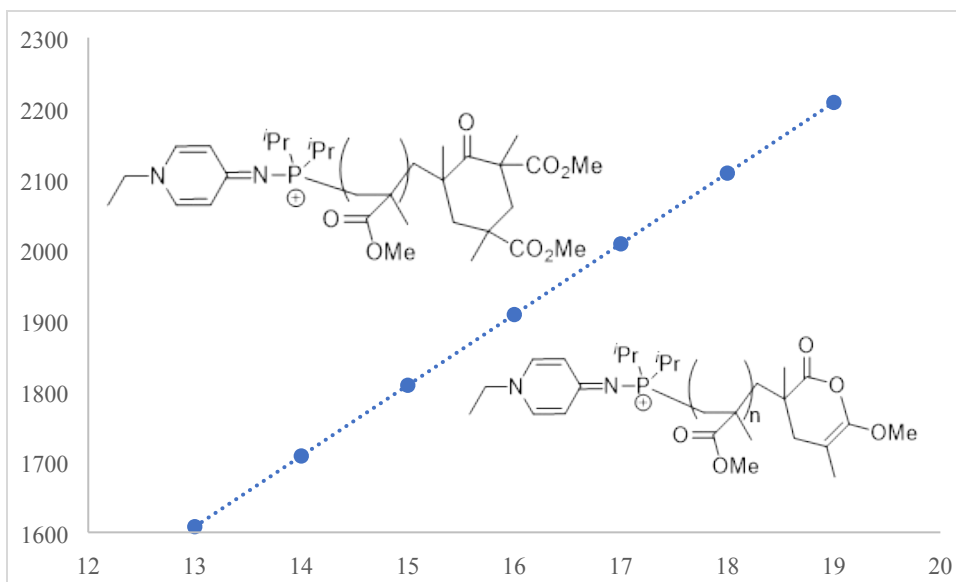

**Figure S78.** Plot of  $m/z$  values taken from Figure S77 vs the number of MMA repeat units ( $n$ ) and the deduced corresponding polymer chain structure produced by PyAP- $i$ Pr- $t$ BuAl(BHT)<sub>2</sub>

**MALDI-TOF MS spectra of low- $M_w$  PMMA by PyAP- $i$ Pr- $t$ Bu<sub>2</sub>AlBHT**

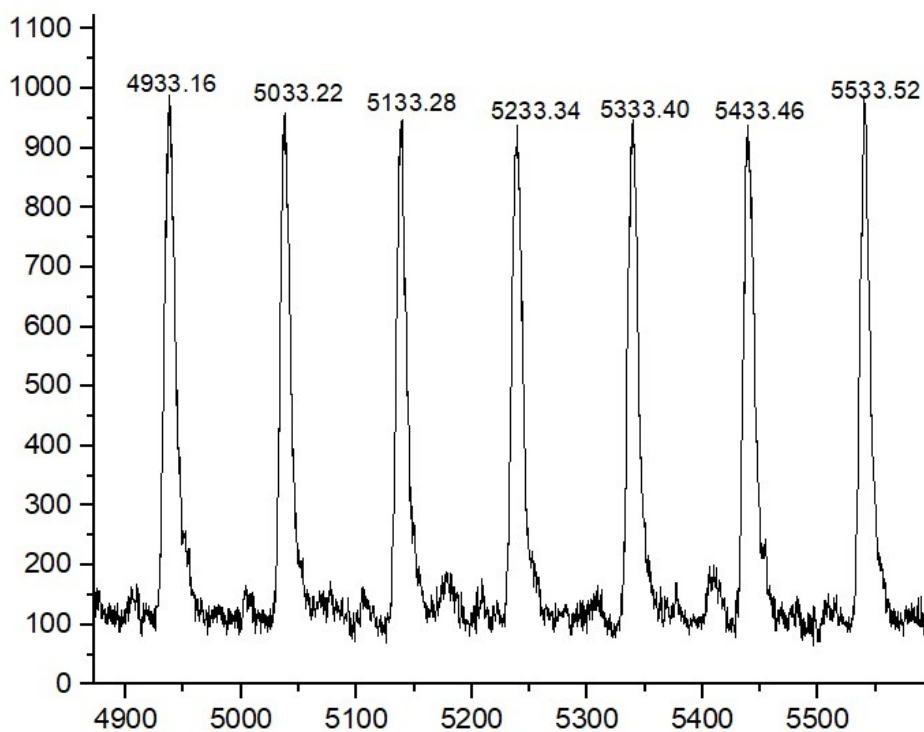

**Figure S79.** MALDI-TOF MS spectrum of the low- $M_w$  PMMA sample produced by PyAP- $i$ Pr- $t$ Bu<sub>2</sub>AlBHT in toluene at ambient temperature

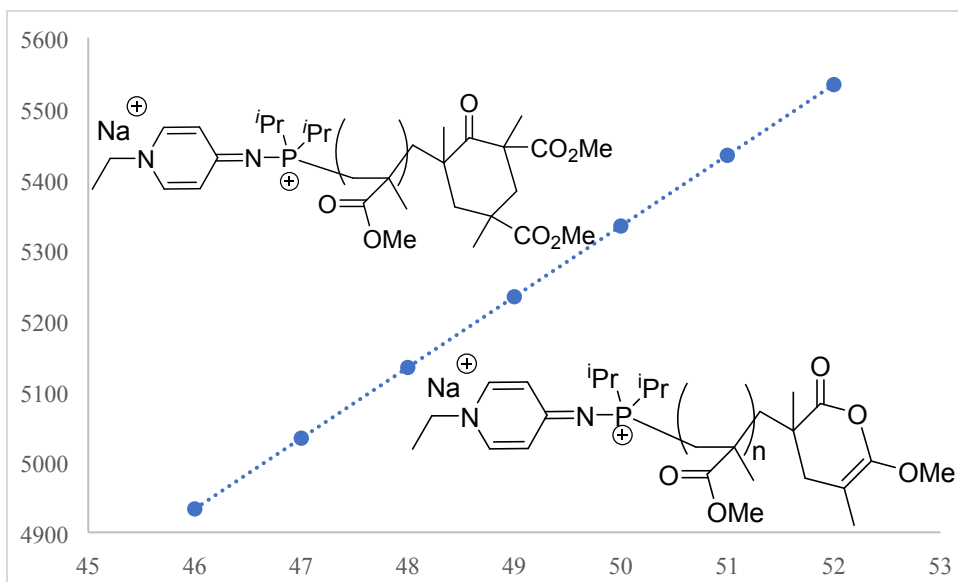

**Figure S80.** Plot of  $m/z$  values taken from Figure S79 vs the number of MMA repeat units ( $n$ ) and the deduced corresponding polymer chain structure produced by PyAP- $i\text{Pr}+i\text{Bu}_2\text{AlBHT}$ .

**MALDI-TOF MS spectra of low- $M_w$  PMMA by PyAP-Ph+MeAl(BHT) $_2$**

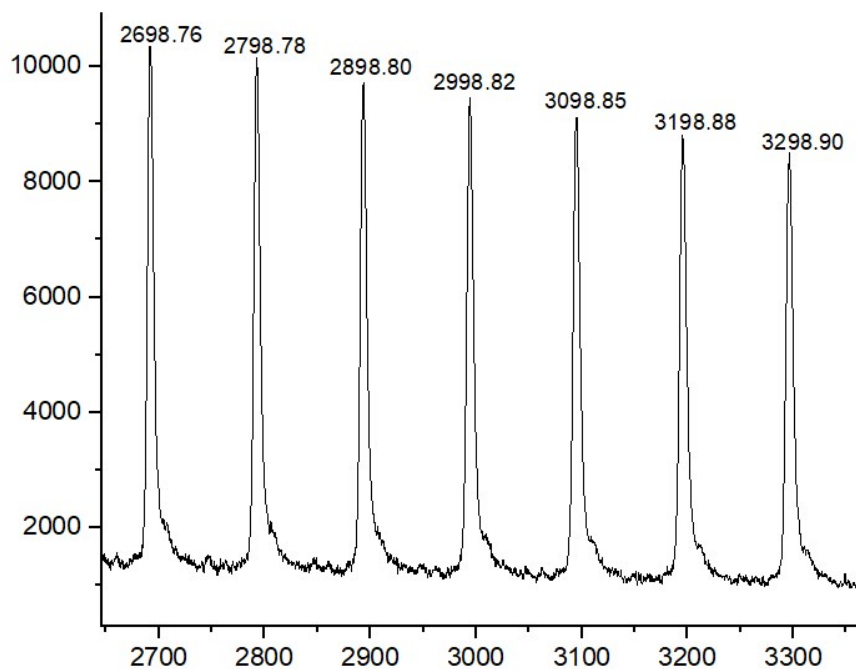

**Figure S81.** MALDI-TOF MS spectrum of the low- $M_w$  PMMA sample produced by PyAP-Ph+MeAl(BHT) $_2$  in toluene at ambient temperature

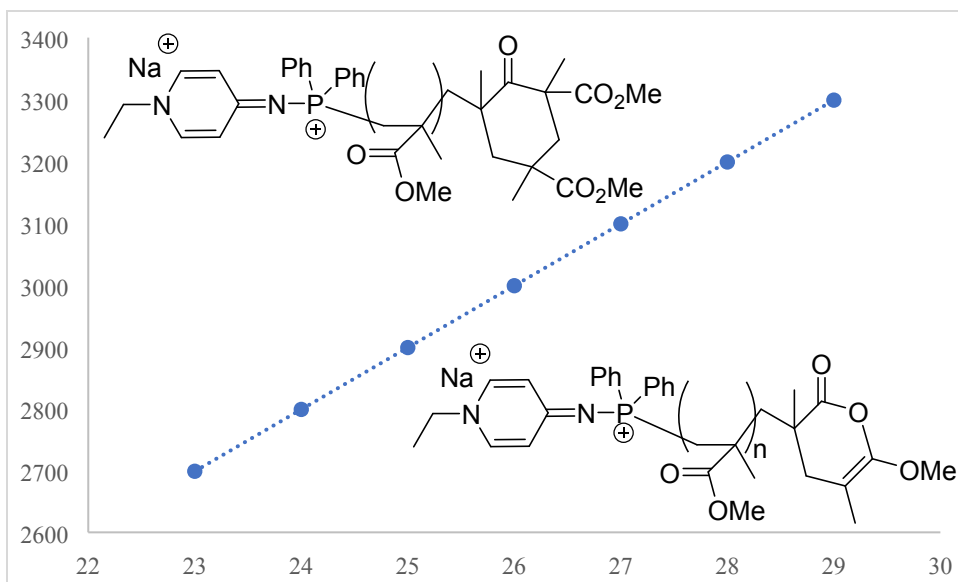

**Figure S82.** Plot of m/z values taken from Figure S81 vs the number of MMA repeat units (n) and the deduced corresponding polymer chain structure produced by PyAP-Ph+MeAl(BHT)<sub>2</sub>

**MALDI-TOF MS spectra of low-M<sub>w</sub> PMMA by PyAP-Ph+<sup>i</sup>BuAl(BHT)<sub>2</sub>**

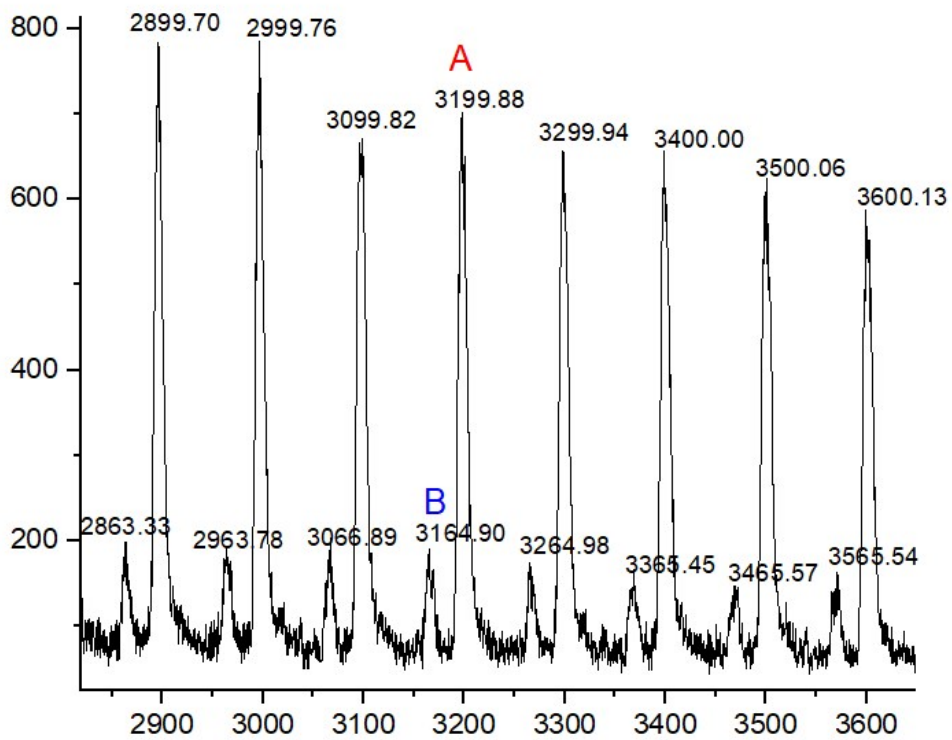

**Figure S83.** MALDI-TOF MS spectrum of the low-M<sub>w</sub> PMMA sample produced by

PyAP-Ph<sup>+</sup>iBuAl(BHT)<sub>2</sub> in toluene at ambient temperature

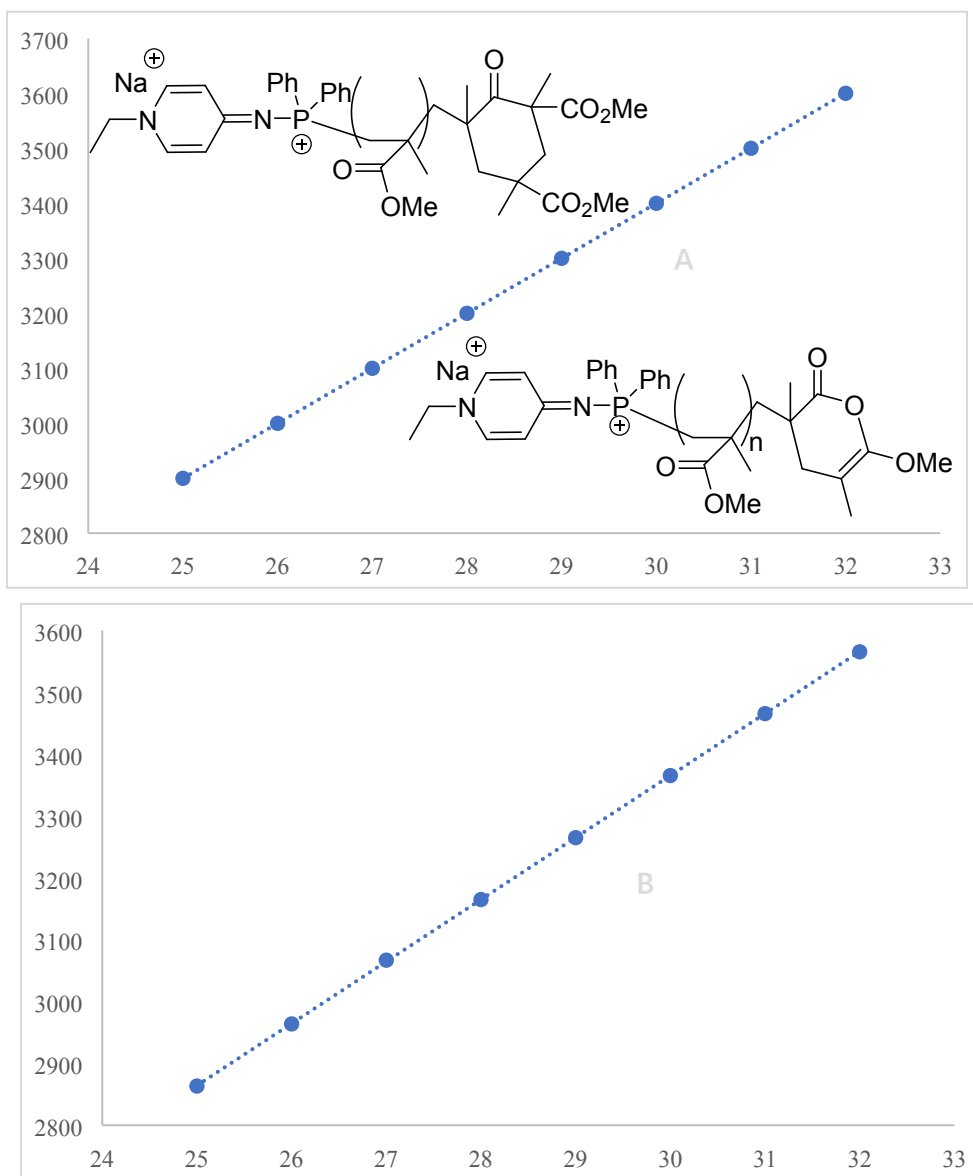

**Figure S84.** Plot of m/z values taken from Figure S83 vs the number of MMA repeat units (n) and the deduced corresponding polymer chain structure produced by PyAP-Ph<sup>+</sup>iBuAl(BHT)<sub>2</sub>, upper: major peaks (A), bottom: minor peaks (B). Species B was not identified.

**MALDI-TOF MS spectra of low-M<sub>w</sub> PMMA by PyAP-Ph<sup>+</sup>iBu<sub>2</sub>AlBHT**



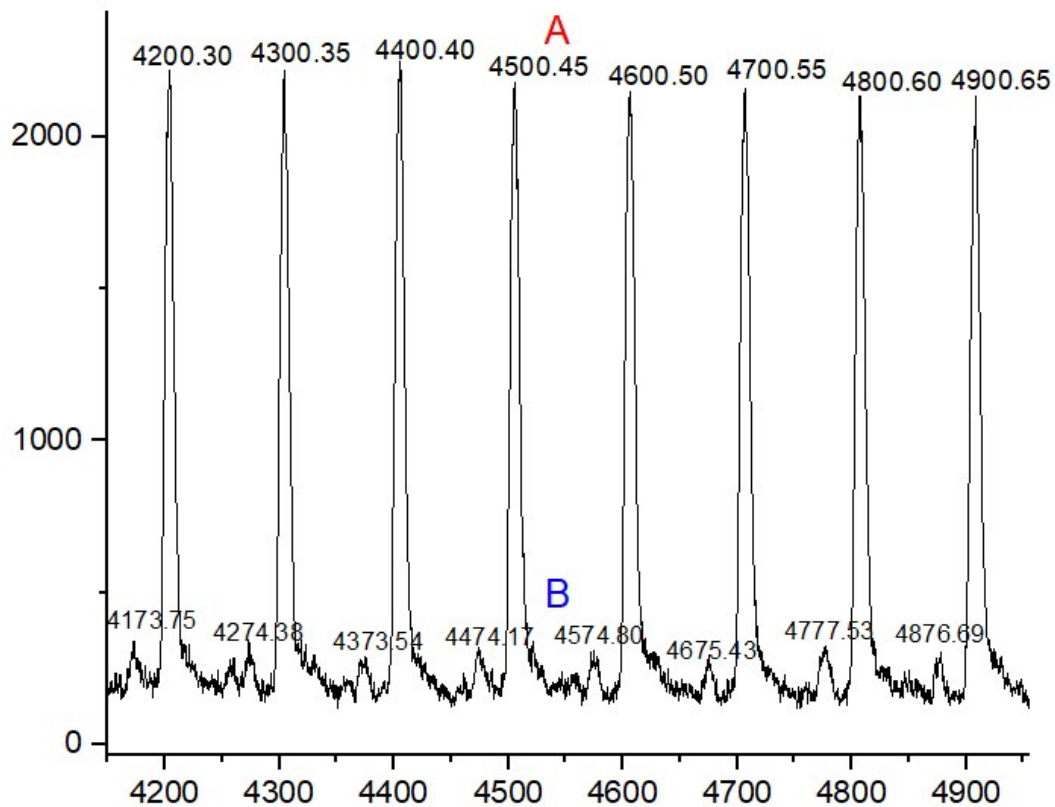

**Figure S85.** MALDI-TOF MS spectrum of the low- $M_w$  PMMA sample produced by PyAP-Ph<sup>+</sup>*t*Bu<sub>2</sub>AlBHT in toluene at ambient temperature

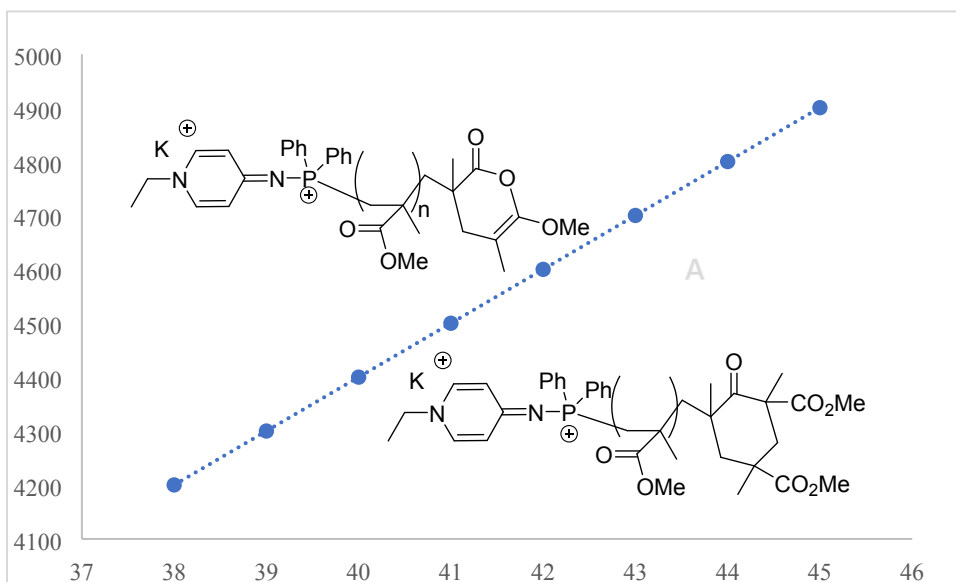

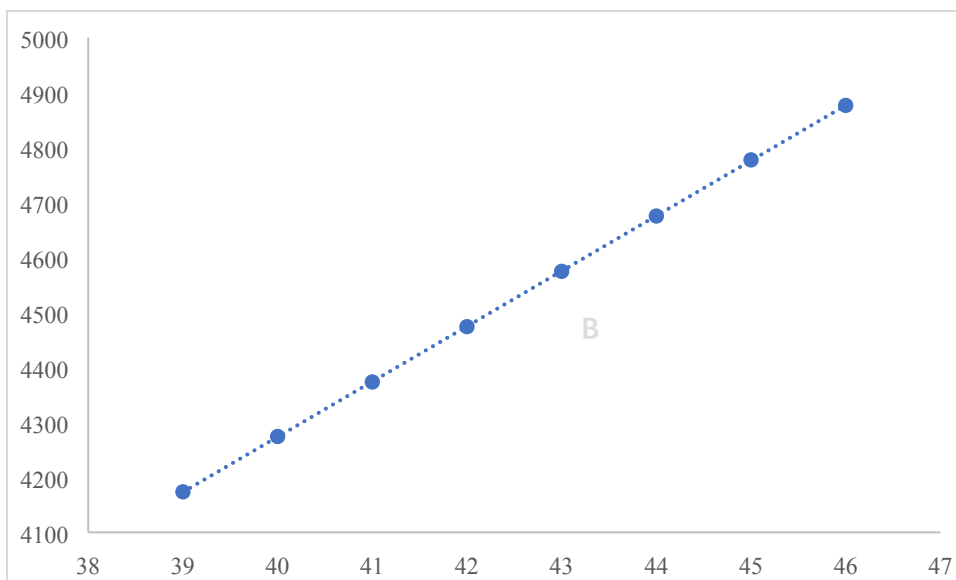

**Figure S86.** Plot of  $m/z$  values taken from Figure S85 vs the number of MMA repeat units ( $n$ ) and the deduced corresponding polymer chain structure produced by PyAP-Ph<sup>*i*</sup>Bu<sub>2</sub>AlBHT, upper: major peaks (**A**), bottom: minor peaks (**B**). Species B was not identified.

### 5 X-ray data of PyAP-<sup>*i*</sup>Bu and INT1

CCDC numbers of PyAP-<sup>*i*</sup>Bu is 1996418. These data can be obtained free of charge from The Cambridge Crystallographic Data Centre via [www.ccdc.cam.ac.uk/data\\_request/cif](http://www.ccdc.cam.ac.uk/data_request/cif).  
Table S2 Crystal data and structure refinement for 1996418.

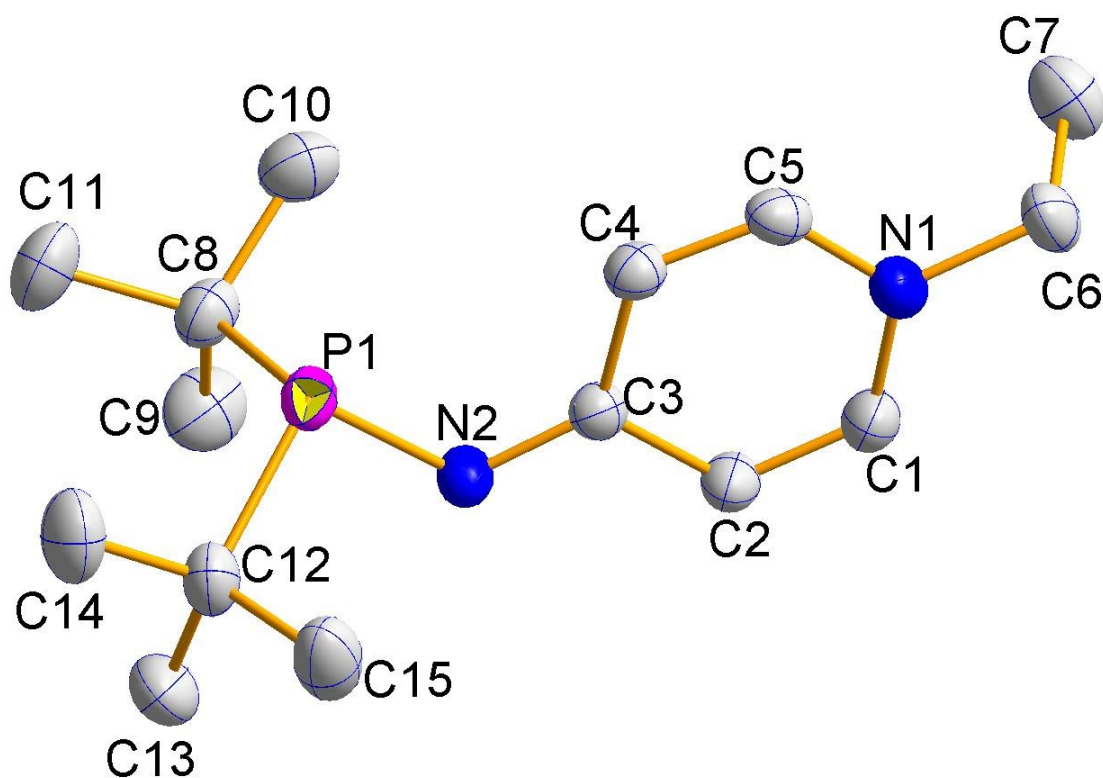

**Figure S87.** X-ray crystal structure of zwitterion **PyAP-*t*Bu**. Hydrogen atoms and Fluorine atom are omitted for clarity and ellipsoids drawn at 30% probability (CCDC # 1996418).

**Table S7 X-ray diffraction data of PyAP-*t*Bu**

|                 |                                                            |
|-----------------|------------------------------------------------------------|
| Identification  |                                                            |
| Code            | 1996418                                                    |
| Formula sum     | C <sub>15</sub> H <sub>27</sub> N <sub>2</sub> P           |
| Formula weight  | 266.36 g/mol                                               |
| Crystal system  | monoclinic                                                 |
| Space-group     | P 1 2 <sub>1</sub> /c 1 (14)                               |
| Cell parameters | a=12.9533(7) Å b=12.0272(4) Å c=11.7499(6) Å β=116.824(5)° |
| Cell ratio      | a/b=1.0770 b/c=1.0236 c/a=0.9071                           |
| Cell volume     | 1633.57(15) Å <sup>3</sup>                                 |
| Z               | 4                                                          |
| Calc. density   | 1.08297 g/cm <sup>3</sup>                                  |
| Meas. density   |                                                            |
| Melting point   |                                                            |
| RAI             | 0.0529                                                     |
| RObs            |                                                            |

Pearson code mP180  
 Formula type NO2P15Q27  
 Wyckoff sequence e45

**Selected geometric informations**

| Atoms 1,2 | d 1,2 [Å]  | Atoms 1,2 | d 1,2 [Å] |
|-----------|------------|-----------|-----------|
| N1-C5     | 1.357(2)   | C8-C10    | 1.539(3)  |
| N1-C1     | 1.359(2)   | C9-H9A    | 0.9600    |
| N1-C6     | 1.468(2)   | C9-H9B    | 0.9600    |
| N2-C3     | 1.306(2)   | C9-H9C    | 0.9600    |
| N2-P1     | 1.7196(15) | C10-H10A  | 0.9600    |
| P1-C12    | 1.878(2)   | C10-H10B  | 0.9600    |
| P1-C8     | 1.886(2)   | C10-H10C  | 0.9600    |
| C1-C2     | 1.343(3)   | C11-H11A  | 0.9600    |
| C1-H1     | 0.9300     | C11-H11B  | 0.9600    |
| C2-C3     | 1.440(2)   | C11-H11C  | 0.9600    |
| C2-H2     | 0.9300     | C12-C13   | 1.524(3)  |
| C3-C4     | 1.446(2)   | C12-C15   | 1.541(3)  |
| C4-C5     | 1.344(3)   | C12-C14   | 1.541(3)  |
| C4-H4     | 0.9300     | C13-H13A  | 0.9600    |
| C5-H5     | 0.9300     | C13-H13B  | 0.9600    |
| C6-C7     | 1.497(3)   | C13-H13C  | 0.9600    |
| C6-H6A    | 0.9700     | C14-H14A  | 0.9600    |
| C6-H6B    | 0.9700     | C14-H14B  | 0.9600    |
| C7-H7A    | 0.9600     | C14-H14C  | 0.9600    |
| C7-H7B    | 0.9600     | C15-H15A  | 0.9600    |
| C7-H7C    | 0.9600     | C15-H15B  | 0.9600    |
| C8-C11    | 1.529(3)   | C15-H15C  | 0.9600    |
| C8-C9     | 1.532(3)   |           |           |

| Atoms 1,2,3 | Angle 1,2,3 [°] | Atoms 1,2,3   | Angle 1,2,3 [°] |
|-------------|-----------------|---------------|-----------------|
| C5-N1-C1    | 117.68(15)      | C8-C9-H9B     | 109.500         |
| C5-N1-C6    | 121.08(16)      | H9A-C9-H9B    | 109.500         |
| C1-N1-C6    | 121.12(17)      | C8-C9-H9C     | 109.500         |
| C3-N2-P1    | 119.59(12)      | H9A-C9-H9C    | 109.500         |
| N2-P1-C12   | 99.09(9)        | H9B-C9-H9C    | 109.500         |
| N2-P1-C8    | 100.03(9)       | C8-C10-H10A   | 109.500         |
| C12-P1-C8   | 110.07(9)       | C8-C10-H10B   | 109.500         |
| C2-C1-N1    | 122.31(18)      | H10A-C10-H10B | 109.500         |
| C2-C1-H1    | 118.800         | C8-C10-H10C   | 109.500         |
| N1-C1-H1    | 118.800         | H10A-C10-H10C | 109.500         |
| C1-C2-C3    | 122.74(17)      | H10B-C10-H10C | 109.500         |
| C1-C2-H2    | 118.600         | C8-C11-H11A   | 109.500         |
| C3-C2-H2    | 118.600         | C8-C11-H11B   | 109.500         |
| N2-C3-C2    | 119.54(15)      | H11A-C11-H11B | 109.500         |
| N2-C3-C4    | 128.16(16)      | C8-C11-H11C   | 109.500         |
| C2-C3-C4    | 112.29(15)      | H11A-C11-H11C | 109.500         |

|            |            |               |            |
|------------|------------|---------------|------------|
| C5-C4-C3   | 121.83(17) | H11B-C11-H11C | 109.500    |
| C5-C4-H4   | 119.100    | C13-C12-C15   | 109.1(2)   |
| C3-C4-H4   | 119.100    | C13-C12-C14   | 110.55(19) |
| C4-C5-N1   | 123.13(16) | C15-C12-C14   | 107.1(2)   |
| C4-C5-H5   | 118.400    | C13-C12-P1    | 116.95(17) |
| N1-C5-H5   | 118.400    | C15-C12-P1    | 104.43(14) |
| N1-C6-C7   | 112.21(18) | C14-C12-P1    | 108.21(16) |
| N1-C6-H6A  | 109.200    | C12-C13-H13A  | 109.500    |
| C7-C6-H6A  | 109.200    | C12-C13-H13B  | 109.500    |
| N1-C6-H6B  | 109.200    | H13A-C13-H13B | 109.500    |
| C7-C6-H6B  | 109.200    | C12-C13-H13C  | 109.500    |
| H6A-C6-H6B | 107.900    | H13A-C13-H13C | 109.500    |
| C6-C7-H7A  | 109.500    | H13B-C13-H13C | 109.500    |
| C6-C7-H7B  | 109.500    | C12-C14-H14A  | 109.500    |
| H7A-C7-H7B | 109.500    | C12-C14-H14B  | 109.500    |
| C6-C7-H7C  | 109.500    | H14A-C14-H14B | 109.500    |
| H7A-C7-H7C | 109.500    | C12-C14-H14C  | 109.500    |
| H7B-C7-H7C | 109.500    | H14A-C14-H14C | 109.500    |
| C11-C8-C9  | 110.4(2)   | H14B-C14-H14C | 109.500    |
| C11-C8-C10 | 108.30(19) | C12-C15-H15A  | 109.500    |
| C9-C8-C10  | 107.9(2)   | C12-C15-H15B  | 109.500    |
| C11-C8-P1  | 110.14(16) | H15A-C15-H15B | 109.500    |
| C9-C8-P1   | 116.44(15) | C12-C15-H15C  | 109.500    |
| C10-C8-P1  | 103.12(14) | H15A-C15-H15C | 109.500    |
| C8-C9-H9A  | 109.500    | H15B-C15-H15C | 109.500    |

| Atoms 1,2,3,4 | Tors. an. 1,2,3,4 [°] | Atoms 1,2,3,4 | Tors. an. 1,2,3,4 [°] |
|---------------|-----------------------|---------------|-----------------------|
| C3-N2-P1-C12  | -141.28(15)           | C5-N1-C6-C7   | -80.1(3)              |
| C3-N2-P1-C8   | 106.32(16)            | C1-N1-C6-C7   | 95.8(2)               |
| C5-N1-C1-C2   | 0.0(3)                | N2-P1-C8-C11  | 167.32(16)            |
| C6-N1-C1-C2   | -176.01(19)           | C12-P1-C8-C11 | 63.71(18)             |
| N1-C1-C2-C3   | 1.1(3)                | N2-P1-C8-C9   | 40.70(19)             |
| P1-N2-C3-C2   | 176.01(13)            | C12-P1-C8-C9  | -62.9(2)              |
| P1-N2-C3-C4   | -3.7(3)               | N2-P1-C8-C10  | -77.28(14)            |
| C1-C2-C3-N2   | 179.01(19)            | C12-P1-C8-C10 | 179.10(14)            |
| C1-C2-C3-C4   | -1.3(3)               | N2-P1-C12-C13 | -60.10(17)            |
| N2-C3-C4-C5   | -179.79(19)           | C8-P1-C12-C13 | 44.15(19)             |
| C2-C3-C4-C5   | 0.5(3)                | N2-P1-C12-C15 | 60.50(18)             |
| C3-C4-C5-N1   | 0.5(3)                | C8-P1-C12-C15 | 164.75(17)            |
| C1-N1-C5-C4   | -0.8(3)               | N2-P1-C12-C14 | 174.31(15)            |
| C6-N1-C5-C4   | 175.23(18)            | C8-P1-C12-C14 | -81.44(17)            |

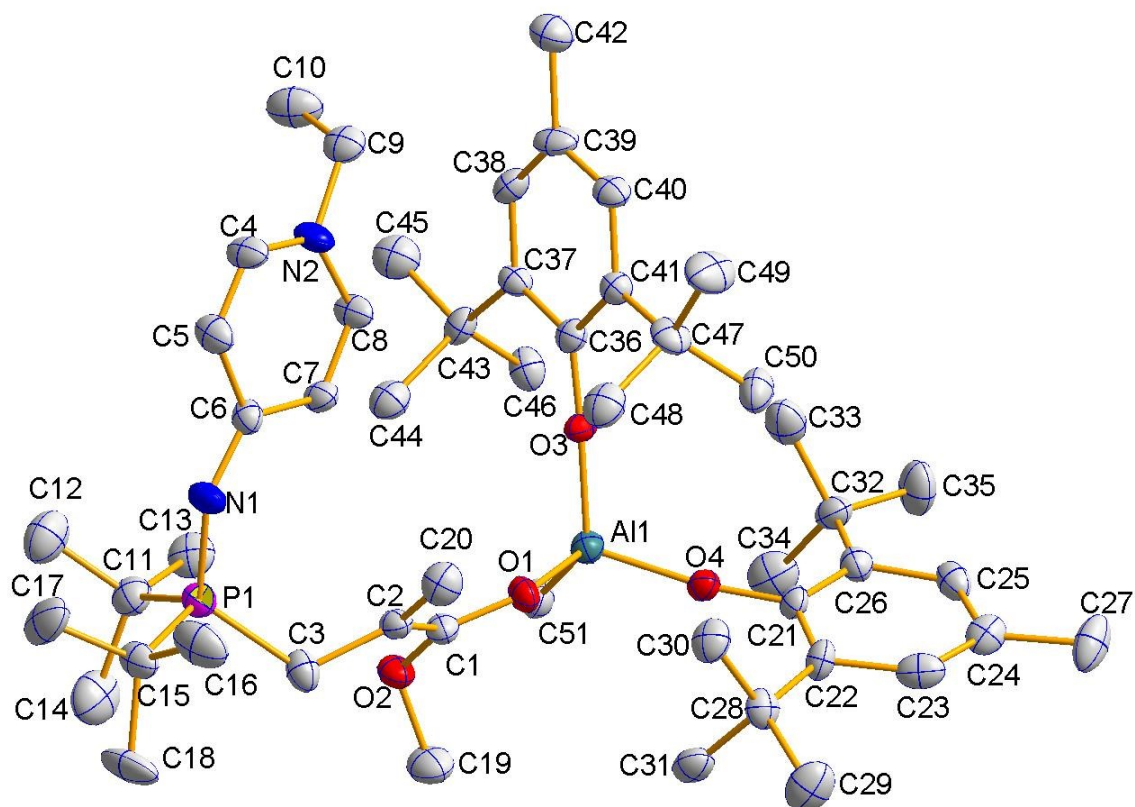

**Figure S88.** X-ray crystal structure of zwitterion **INT1**. Hydrogen atoms and Fluorine atom are omitted for clarity and ellipsoids drawn at 15% probability (CCDC # 2011850).

**Table S8 X-ray diffraction data of INT1.**

|                            |                                             |
|----------------------------|---------------------------------------------|
| <b>Identification Code</b> | C51H84AlN2O4P                               |
| <b>Formula weight</b>      | 847.15 g/mol                                |
| <b>Crystal system</b>      | orthorhombic                                |
| <b>Space-group</b>         | P n a 21 (33)                               |
| <b>Cell parameters</b>     | a=23.690(2) Å b=12.7455(11) Å c=23.188(2) Å |
| <b>Cell ratio</b>          | a/b=1.8587 b/c=0.5497 c/a=0.9788            |
| <b>Cell volume</b>         | 7001.41(104) Å <sup>3</sup>                 |
| <b>Z</b>                   | 4                                           |
| <b>Calc. density</b>       | 0.803634 g/cm <sup>3</sup>                  |
| <b>Meas. density</b>       | 0 g/cm <sup>3</sup>                         |
| <b>Melting point</b>       |                                             |
| <b>RAI</b>                 | 0.1243                                      |
| <b>RObs</b>                |                                             |
| <b>Pearson code</b>        | oP572                                       |
| <b>Formula type</b>        | NOP2Q4R51...                                |
| <b>Wyckoff sequence</b>    | a143                                        |

**Selected geometric informations**

| Atoms 1,2 | d 1,2 [?] | Atoms 1,2 | d 1,2 [?] |
|-----------|-----------|-----------|-----------|
| Al1-O3    | 1.729(3)  | C24-C27   | 1.527(6)  |
| Al1-O1    | 1.748(3)  | C25-C26   | 1.431(6)  |
| Al1-O4    | 1.749(3)  | C25-H25   | 0.9300    |

|          |          |          |          |
|----------|----------|----------|----------|
| AI1-C51  | 1.961(4) | C26-C32  | 1.506(6) |
| P1-N1    | 1.550(4) | C27-H27A | 0.9600   |
| P1-C3    | 1.814(4) | C27-H27B | 0.9600   |
| P1-C15   | 1.840(5) | C27-H27C | 0.9600   |
| P1-C11   | 1.860(6) | C28-C31  | 1.489(5) |
| N1-C6    | 1.316(5) | C28-C30  | 1.508(5) |
| N2-C4    | 1.324(5) | C28-C29  | 1.567(5) |
| N2-C8    | 1.329(5) | C29-H29A | 0.9600   |
| N2-C9    | 1.446(5) | C29-H29B | 0.9600   |
| O1-C1    | 1.282(5) | C29-H29C | 0.9600   |
| O2-C1    | 1.369(5) | C30-H30A | 0.9600   |
| O2-C19   | 1.434(5) | C30-H30B | 0.9600   |
| O3-C36   | 1.327(5) | C30-H30C | 0.9600   |
| O4-C21   | 1.318(5) | C31-H31A | 0.9600   |
| C1-C2    | 1.323(6) | C31-H31B | 0.9600   |
| C2-C3    | 1.506(5) | C31-H31C | 0.9600   |
| C2-C20   | 1.525(6) | C32-C33  | 1.509(6) |
| C3-H3A   | 0.9700   | C32-C35  | 1.521(6) |
| C3-H3B   | 0.9700   | C32-C34  | 1.528(6) |
| C4-C5    | 1.275(5) | C33-H33A | 0.9600   |
| C4-H4    | 0.9300   | C33-H33B | 0.9600   |
| C5-C6    | 1.417(6) | C33-H33C | 0.9600   |
| C5-H5    | 0.9300   | C34-H34A | 0.9600   |
| C6-C7    | 1.408(5) | C34-H34B | 0.9600   |
| C7-C8    | 1.314(5) | C34-H34C | 0.9600   |
| C7-H7    | 0.9300   | C35-H35A | 0.9600   |
| C8-H8    | 0.9300   | C35-H35B | 0.9600   |
| C9-C10   | 1.445(5) | C35-H35C | 0.9600   |
| C9-H9A   | 0.9700   | C36-C41  | 1.387(6) |
| C9-H9B   | 0.9700   | C36-C37  | 1.435(5) |
| C10-H10A | 0.9600   | C37-C38  | 1.363(5) |
| C10-H10B | 0.9600   | C37-C43  | 1.503(5) |
| C10-H10C | 0.9600   | C38-C39  | 1.313(6) |
| C11-C13  | 1.472(6) | C38-H38  | 0.9300   |
| C11-C12  | 1.487(6) | C39-C40  | 1.389(6) |
| C11-C14  | 1.589(6) | C39-C42  | 1.540(6) |
| C12-H12A | 0.9600   | C40-C41  | 1.378(5) |
| C12-H12B | 0.9600   | C40-H40  | 0.9300   |
| C12-H12C | 0.9600   | C41-C47  | 1.481(6) |
| C13-H13A | 0.9600   | C42-H42A | 0.9600   |
| C13-H13B | 0.9600   | C42-H42B | 0.9600   |
| C13-H13C | 0.9600   | C42-H42C | 0.9600   |
| C14-H14A | 0.9600   | C43-C45  | 1.528(5) |
| C14-H14B | 0.9600   | C43-C44  | 1.536(5) |
| C14-H14C | 0.9600   | C43-C46  | 1.542(5) |
| C15-C17  | 1.469(6) | C44-H44A | 0.9600   |
| C15-C16  | 1.502(7) | C44-H44B | 0.9600   |
| C15-C18  | 1.533(6) | C44-H44C | 0.9600   |
| C16-H16A | 0.9600   | C45-H45A | 0.9600   |
| C16-H16B | 0.9600   | C45-H45B | 0.9600   |
| C16-H16C | 0.9600   | C45-H45C | 0.9600   |
| C17-H17A | 0.9600   | C46-H46A | 0.9600   |
| C17-H17B | 0.9600   | C46-H46B | 0.9600   |
| C17-H17C | 0.9600   | C46-H46C | 0.9600   |
| C18-H18A | 0.9600   | C47-C50  | 1.536(6) |
| C18-H18B | 0.9600   | C47-C49  | 1.539(6) |
| C18-H18C | 0.9600   | C47-C48  | 1.553(6) |
| C19-H19A | 0.9600   | C48-H48A | 0.9600   |
| C19-H19B | 0.9600   | C48-H48B | 0.9600   |
| C19-H19C | 0.9600   | C48-H48C | 0.9600   |
| C20-H20A | 0.9600   | C49-H49A | 0.9600   |
| C20-H20B | 0.9600   | C49-H49B | 0.9600   |
| C20-H20C | 0.9600   | C49-H49C | 0.9600   |
| C21-C22  | 1.352(5) | C50-H50A | 0.9600   |
| C21-C26  | 1.375(6) | C50-H50B | 0.9600   |
| C22-C23  | 1.444(6) | C50-H50C | 0.9600   |

|         |          |          |        |
|---------|----------|----------|--------|
| C22-C28 | 1.474(6) | C51-H51A | 0.9600 |
| C23-C24 | 1.300(6) | C51-H51B | 0.9600 |
| C23-H23 | 0.9300   | C51-H51C | 0.9600 |
| C24-C25 | 1.377(6) |          |        |

| Atoms 1,2,3   | Angle 1,2,3 [°] | Atoms 1,2,3   | Angle 1,2,3 [°] |
|---------------|-----------------|---------------|-----------------|
| O3-Al1-O1     | 103.47(15)      | C21-C26-C32   | 127.4(6)        |
| O3-Al1-O4     | 110.21(15)      | C25-C26-C32   | 116.8(6)        |
| O1-Al1-O4     | 108.34(15)      | C24-C27-H27A  | 109.500         |
| O3-Al1-C51    | 118.52(16)      | C24-C27-H27B  | 109.500         |
| O1-Al1-C51    | 108.57(18)      | H27A-C27-H27B | 109.500         |
| O4-Al1-C51    | 107.34(16)      | C24-C27-H27C  | 109.500         |
| N1-P1-C3      | 121.1(2)        | H27A-C27-H27C | 109.500         |
| N1-P1-C15     | 102.4(2)        | H27B-C27-H27C | 109.500         |
| C3-P1-C15     | 104.4(2)        | C22-C28-C31   | 105.9(4)        |
| N1-P1-C11     | 107.8(2)        | C22-C28-C30   | 111.7(5)        |
| C3-P1-C11     | 106.9(2)        | C31-C28-C30   | 109.8(4)        |
| C15-P1-C11    | 114.5(3)        | C22-C28-C29   | 117.8(5)        |
| C6-N1-P1      | 141.6(4)        | C31-C28-C29   | 101.7(4)        |
| C4-N2-C8      | 117.6(4)        | C30-C28-C29   | 109.2(4)        |
| C4-N2-C9      | 123.3(5)        | C28-C29-H29A  | 109.500         |
| C8-N2-C9      | 119.1(5)        | C28-C29-H29B  | 109.500         |
| C1-O1-Al1     | 138.6(3)        | H29A-C29-H29B | 109.500         |
| C1-O2-C19     | 112.2(4)        | C28-C29-H29C  | 109.500         |
| C36-O3-Al1    | 177.3(3)        | H29A-C29-H29C | 109.500         |
| C21-O4-Al1    | 172.3(3)        | H29B-C29-H29C | 109.500         |
| O1-C1-C2      | 125.9(5)        | C28-C30-H30A  | 109.500         |
| O1-C1-O2      | 118.4(5)        | C28-C30-H30B  | 109.500         |
| C2-C1-O2      | 115.6(5)        | H30A-C30-H30B | 109.500         |
| C1-C2-C3      | 124.6(5)        | C28-C30-H30C  | 109.500         |
| C1-C2-C20     | 120.5(5)        | H30A-C30-H30C | 109.500         |
| C3-C2-C20     | 114.1(4)        | H30B-C30-H30C | 109.500         |
| C2-C3-P1      | 120.2(3)        | C28-C31-H31A  | 109.500         |
| C2-C3-H3A     | 107.300         | C28-C31-H31B  | 109.500         |
| A1-C3-H3A     | 107.300         | H31A-C31-H31B | 109.500         |
| C2-C3-H3B     | 107.300         | C28-C31-H31C  | 109.500         |
| A1-C3-H3B     | 107.300         | H31A-C31-H31C | 109.500         |
| H3A-C3-H3B    | 106.900         | H31B-C31-H31C | 109.500         |
| C5-C4-N2      | 123.3(5)        | C26-C32-C33   | 107.8(5)        |
| C5-C4-H4      | 118.300         | C26-C32-C35   | 115.6(5)        |
| N2-C4-H4      | 118.300         | C33-C32-C35   | 107.3(5)        |
| C4-C5-C6      | 123.2(5)        | C26-C32-C34   | 109.9(5)        |
| C4-C5-H5      | 118.400         | C33-C32-C34   | 112.5(5)        |
| C6-C5-H5      | 118.400         | C35-C32-C34   | 103.9(5)        |
| N1-C6-C7      | 129.4(5)        | C32-C33-H33A  | 109.500         |
| N1-C6-C5      | 119.8(5)        | C32-C33-H33B  | 109.500         |
| C7-C6-C5      | 110.8(5)        | H33A-C33-H33B | 109.500         |
| C8-C7-C6      | 123.5(5)        | C32-C33-H33C  | 109.500         |
| C8-C7-H7      | 118.200         | H33A-C33-H33C | 109.500         |
| C6-C7-H7      | 118.200         | H33B-C33-H33C | 109.500         |
| C7-C8-N2      | 121.2(5)        | C32-C34-H34A  | 109.500         |
| C7-C8-H8      | 119.400         | C32-C34-H34B  | 109.500         |
| N2-C8-H8      | 119.400         | H34A-C34-H34B | 109.500         |
| C10-C9-N2     | 113.8(5)        | C32-C34-H34C  | 109.500         |
| C10-C9-H9A    | 108.800         | H34A-C34-H34C | 109.500         |
| N2-C9-H9A     | 108.800         | H34B-C34-H34C | 109.500         |
| C10-C9-H9B    | 108.800         | C32-C35-H35A  | 109.500         |
| N2-C9-H9B     | 108.800         | C32-C35-H35B  | 109.500         |
| H9A-C9-H9B    | 107.700         | H35A-C35-H35B | 109.500         |
| C9-C10-H10A   | 109.500         | C32-C35-H35C  | 109.500         |
| C9-C10-H10B   | 109.500         | H35A-C35-H35C | 109.500         |
| H10A-C10-H10B | 109.500         | H35B-C35-H35C | 109.500         |
| C9-C10-H10C   | 109.500         | O3-C36-C41    | 122.8(5)        |
| H10A-C10-H10C | 109.500         | O3-C36-C37    | 120.2(5)        |
| H10B-C10-H10C | 109.500         | C41-C36-C37   | 116.9(5)        |
| C13-C11-C12   | 108.6(5)        | C38-C37-C36   | 118.8(5)        |



|               |          |               |          |
|---------------|----------|---------------|----------|
| C13-C11-C14   | 110.9(5) | C38-C37-C43   | 120.1(6) |
| C12-C11-C14   | 106.0(5) | C36-C37-C43   | 121.1(5) |
| C13-C11-P1    | 108.9(4) | C39-C38-C37   | 123.9(5) |
| C12-C11-P1    | 110.7(4) | C39-C38-H38   | 118.100  |
| C14-C11-P1    | 111.7(4) | C37-C38-H38   | 118.100  |
| C11-C12-H12A  | 109.500  | C38-C39-C40   | 119.2(5) |
| C11-C12-H12B  | 109.500  | C38-C39-C42   | 122.2(7) |
| H12A-C12-H12B | 109.500  | C40-C39-C42   | 118.6(6) |
| C11-C12-H12C  | 109.500  | C41-C40-C39   | 120.0(5) |
| H12A-C12-H12C | 109.500  | C41-C40-H40   | 120.000  |
| H12B-C12-H12C | 109.500  | C39-C40-H40   | 120.000  |
| C11-C13-H13A  | 109.500  | C40-C41-C36   | 121.1(5) |
| C11-C13-H-13B | 109.500  | C40-C41-C47   | 115.7(5) |
| H13A-C13-H13B | 109.500  | C36-C41-C47   | 123.2(5) |
| C11-C13-H13C  | 109.500  | C39-C42-H42A  | 109.500  |
| H13A-C13-H13C | 109.500  | C39-C42-H42B  | 109.500  |
| H13B-C13-H13C | 109.500  | H42A-C42-H42B | 109.500  |
| C11-C14-H14A  | 109.500  | C39-C42-H42C  | 109.500  |
| C11-C14-H14B  | 109.500  | H42A-C42-H42C | 109.500  |
| H14A-C14-H14B | 109.500  | H42B-C42-H42C | 109.500  |
| C11-C14-H14C  | 109.500  | C37-C43-C45   | 112.9(5) |
| H14A-C14-H14C | 109.500  | C37-C43-C44   | 113.6(4) |
| H14B-C14-H14C | 109.500  | C45-C43-C44   | 101.5(4) |
| C17-C15-C16   | 105.7(5) | C37-C43-C46   | 110.7(4) |
| C17-C15-C18   | 109.5(5) | C45-C43-C46   | 107.1(4) |
| C16-C15-C18   | 108.4(5) | C44-C43-C46   | 110.4(4) |
| C17-C15-P1    | 115.0(4) | C43-C44-H44A  | 109.500  |
| C16-C15-P1    | 104.6(4) | C43-C44-H44B  | 109.500  |
| C18-C15-P1    | 113.0(4) | H44A-C44-H44B | 109.500  |
| C15-C16-H16A  | 109.500  | C43-C44-H44C  | 109.500  |
| C15-C16-H16B  | 109.500  | H44A-C44-H44C | 109.500  |
| H16A-C16-H16B | 109.500  | H44B-C44-H44C | 109.500  |
| C15-C16-H16C  | 109.500  | C43-C45-H45A  | 109.500  |
| H16A-C16-H16C | 109.500  | C43-C45-H45B  | 109.500  |
| H16B-C16-H16C | 109.500  | H45A-C45-H45B | 109.500  |
| C15-C17-H17A  | 109.500  | C43-C45-H45C  | 109.500  |
| C15-C17-H17B  | 109.500  | H45A-C45-H45C | 109.500  |
| H17A-C17-H17B | 109.500  | H45B-C45-H45C | 109.500  |
| C15C17H17C    | 109.500  | C43-C46-H46A  | 109.500  |
| H17A-C17-H17C | 109.500  | C43-C46-H46B  | 109.500  |
| H17B-C17-H17C | 109.500  | H46A-C46-H46B | 109.500  |
| C15-C18-H18A  | 109.500  | C43-C46-H46C  | 109.500  |
| C15-C18-H18B  | 109.500  | H46A-C46-H46C | 109.500  |
| H18A-C18-H18B | 109.500  | H46B-C46-H46C | 109.500  |
| C15-C18-H18C  | 109.500  | C41-C47-C50   | 114.1(5) |
| H18A-C18-H18C | 109.500  | C41-C47-C49   | 115.9(5) |
| H18B-C18-H18C | 109.500  | C50-C47-C49   | 104.7(5) |
| O2-C19-H19A   | 109.500  | C41-C47-C48   | 108.1(5) |
| O2-C19-H19B   | 109.500  | C5-0C47-C48   | 108.9(5) |
| H19A-C19-H19B | 109.500  | C49-C47-C48   | 104.5(5) |
| O2-C19-H19C   | 109.500  | C47-C48-H48A  | 109.500  |
| H19A-C19-H19C | 109.500  | C47-C48-H48B  | 109.500  |
| H19B-C19-H19C | 109.500  | H48A-C48-H48B | 109.500  |
| C2-C20-H20A   | 109.500  | C47-C48-H48C  | 109.500  |
| C2-C20-H20B   | 109.500  | H48A-C48-H48C | 109.500  |
| H20A-C20-H20B | 109.500  | H48B-C48-H48C | 109.500  |
| C2-C20-H20C   | 109.500  | C47-C49-H49A  | 109.500  |
| H20A-C20-H20C | 109.500  | C47-C49-H49B  | 109.500  |
| H20B-C20-H20C | 109.500  | H49A-C49-H49B | 109.500  |
| O4-C21-C22    | 117.8(5) | C47-C49-H49C  | 109.500  |
| O4-C21-C26    | 119.2(6) | H49A-C49-H49C | 109.500  |
| C22-C21-C26   | 122.9(5) | H49B-C49-H49C | 109.500  |
| C21-C22-C23   | 115.5(5) | C47-C50-H50A  | 109.500  |
| C21-C22-C28   | 129.1(5) | C47-C50-H50B  | 109.500  |
| C23-C22-C28   | 115.4(6) | H50A-C50-H50B | 109.500  |
| C24-C23-C22   | 126.6(6) | C47-C50-H50C  | 109.500  |

|             |          |               |         |
|-------------|----------|---------------|---------|
| C24-C23-H23 | 116.700  | H50A-C50-H50C | 109.500 |
| C22-C23-H23 | 116.700  | H50B-C50-H50C | 109.500 |
| C23-C24-C25 | 114.7(6) | Al1-C51-H51A  | 109.500 |
| C23-C24-C27 | 126.3(7) | Al1-C51-H51B  | 109.500 |
| C25-C24-C27 | 119.0(6) | H51A-C51-H51B | 109.500 |
| C24-C25-C26 | 124.4(5) | Al1-C51-H51C  | 109.500 |
| C24-C25-H25 | 117.800  | H51A-C51-H51C | 109.500 |
| C26-C25-H25 | 117.800  | H51B-C51-H51C | 109.500 |
| C21-C26-C25 | 115.7(5) |               |         |

| Atoms 1,2,3,4  | Tors. an. 1,2,3,4<br>[°] | Atoms 1,2,3,4   | Tors. an. 1,2,3,4<br>[°] |
|----------------|--------------------------|-----------------|--------------------------|
| C3-P1-N1-C6    | 54.3(6)                  | O4-C21-C22-C23  | -176.1(4)                |
| C15-P1-N1-C6   | 169.8(6)                 | C26-C21-C22-C23 | 6.8(7)                   |
| C11-P1-N1-C6   | -69.1(6)                 | O4-C21-C22-C28  | -0.1(8)                  |
| O3-Al1-O1-C1   | 101.3(5)                 | C26-C21-C22-C28 | -177.2(5)                |
| O4-Al1-O1-C1   | -141.7(4)                | C21-C22-C23-C24 | -3.1(8)                  |
| C51-Al1-O1-C1  | -25.4(5)                 | C28-C22-C23-C24 | -179.7(5)                |
| O1-Al1-O3-C36  | -67.(7)                  | C22-C23-C24-C25 | -0.4(8)                  |
| O4-Al1-O3-C36  | 178.(100)                | C22-C23-C24-C27 | 177.3(4)                 |
| C51-Al1-O3-C36 | 54.(7)                   | C23-C24-C25-C26 | 0.5(7)                   |
| O3-Al1-O4-C21  | 4.(3)                    | C27-C24-C25-C26 | -177.4(4)                |
| O1-Al1-O4-C21  | -108.(3)                 | O4-C21-C26-C25  | 176.2(4)                 |
| C51-Al1-O4-C21 | 135.(3)                  | C22-C21-C26-C25 | -6.8(7)                  |
| Al1-O1-C1-C2   | -149.3(4)                | O4-C21-C26-C32  | -8.1(8)                  |
| Al1-O1-C1-O2   | 28.0(7)                  | C22-C21-C26-C32 | 168.9(5)                 |
| C19-O2-C1-O1   | 78.4(5)                  | C24-C25-C26-C21 | 2.9(7)                   |
| C19-O2-C1-C2   | -104.1(5)                | C24-C25-C26-C32 | -173.2(5)                |
| O1-C1-C2-C3    | -175.9(4)                | C21-C22-C28-C31 | 56.0(7)                  |
| O2-C1-C2-C3    | 6.8(7)                   | C23-C22-C28-C31 | -128.0(5)                |
| O1-C1-C2-C20   | -6.7(8)                  | C21-C22-C28-C30 | -63.5(7)                 |
| O2-C1-C2-C20   | 176.0(4)                 | C23-C22-C28-C30 | 112.5(5)                 |
| C1-C2-C3-P1    | -114.8(5)                | C21-C22-C28-C29 | 168.8(5)                 |
| C20-C2-C3-P1   | 75.4(5)                  | C23-C22-C28-C29 | -15.1(7)                 |
| N1-P1-C3-C2    | -23.4(5)                 | C21-C26-C32-C33 | 66.5(7)                  |
| C15-P1-C3-C2   | -137.8(4)                | C25-C26-C32-C33 | -117.9(5)                |
| C11-P1-C3-C2   | 100.4(4)                 | C21-C26-C32-C35 | -173.5(5)                |
| C8-N2-C4-C5    | -6.4(8)                  | C25-C26-C32-C35 | 2.1(7)                   |
| C9-N2-C4-C5    | 172.8(5)                 | C21-C26-C32-C34 | -56.4(7)                 |
| N2-C4-C5-C6    | 2.4(9)                   | C25-C26-C32-C34 | 119.2(5)                 |
| Al1-N1-C6-C7   | -13.5(9)                 | Al1-O3-C36-C41  | 138.(7)                  |
| Al1-N1-C6-C5   | 164.0(4)                 | Al1-O3-C36-C37  | -44.(7)                  |
| C4-C5-C6-N1    | -177.2(5)                | O3-C36-C37-C38  | -176.4(4)                |
| C4-C5-C6-C7    | 0.8(7)                   | C41-C36-C37-C38 | 1.8(6)                   |
| N1-C6-C7-C8    | 178.0(5)                 | O3-C36-C37-C43  | 4.4(6)                   |
| C5-C6-C7-C8    | 0.2(7)                   | C41-C36-C37-C43 | -177.3(4)                |
| C6-C7-C8-N2    | -4.4(8)                  | C36-C37-C38-C39 | -0.1(7)                  |
| C4-N2-C8-C7    | 7.3(7)                   | C43-C37-C38-C39 | 179.1(5)                 |
| C9-N2-C8-C7    | -171.9(5)                | C37-C38-C39-C40 | 0.6(8)                   |
| C4-N2-C9-C10   | -92.0(6)                 | C37-C38-C39-C42 | 178.2(4)                 |
| C8-N2-C9-C10   | 87.1(5)                  | C38-C39-C40-C41 | -2.9(8)                  |
| N1-P1-C11-C13  | 72.7(4)                  | C42-C39-C40-C41 | 179.4(4)                 |
| C3-P1-C11-C13  | -59.0(4)                 | C39-C40-C41-C36 | 4.8(7)                   |
| C15-P1-C11-C13 | -174.1(4)                | C39-C40-C41-C47 | -174.8(5)                |
| N1-P1-C11-C12  | -46.6(5)                 | O3-C36-C41-C40  | 174.0(4)                 |
| C3-P1-C11-C12  | -178.3(4)                | C37-C36-C41-C40 | -4.2(6)                  |
| C15-P1-C11-C12 | 66.5(5)                  | O3-C36-C41-C47  | -6.3(7)                  |
| N1-P1-C11-C14  | -164.5(4)                | C37-C36-C41-C47 | 175.4(4)                 |
| C3-P1-C11-C14  | 63.8(5)                  | C38-C37-C43-C45 | -6.0(6)                  |
| C15-P1-C11-C14 | -51.3(5)                 | C36-C37-C43-C45 | 173.1(4)                 |
| N1-P1-C15-C17  | 58.5(5)                  | C38-C37-C43-C44 | -120.9(5)                |
| C3-P1-C15-C17  | -174.4(4)                | C36-C37-C43-C44 | 58.2(6)                  |
| C11-P1-C15-C17 | -57.8(5)                 | C38-C37-C43-C46 | 114.1(5)                 |
| N1-P1-C15-C16  | -57.0(4)                 | C36-C37-C43-C46 | -66.8(5)                 |
| C3-P1-C15-C16  | 70.1(4)                  | C40-C41-C47-C50 | -118.0(5)                |
| C11-P1-C15-C16 | -173.3(4)                | C36-C41-C47-C50 | 62.3(6)                  |

|                |           |                 |           |
|----------------|-----------|-----------------|-----------|
| N1-P1-C15-C18  | -174.7(4) | C40-C41-C47-C49 | 3.7(7)    |
| C3-P1-C15-C18  | -47.7(5)  | C36-C41-C47-C49 | -175.9(5) |
| C11-P1-C15-C18 | 69.0(5)   | C40-C41-C47-C48 | 120.6(4)  |
| Al1-O4-C21-C22 | 114.(2)   | C36-C41-C47-C48 | -59.0(6)  |
| Al1-O4-C21-C26 | -69.(3)   |                 |           |

## 6 Proposed Polymerization Mechanism

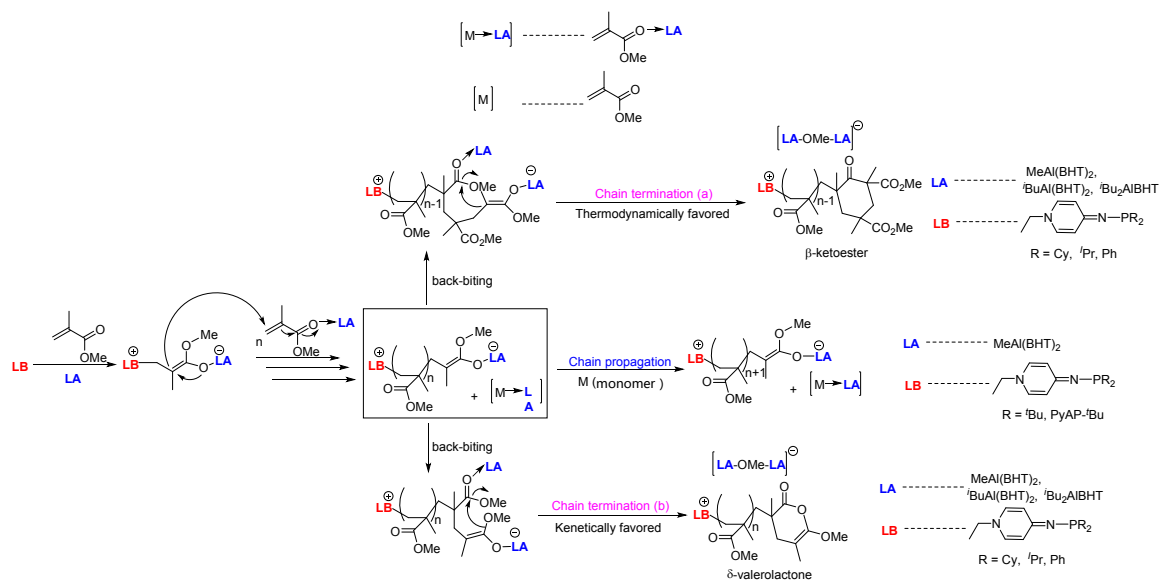

**Scheme S1.** Proposed Mechanism for Polymerization of MMA by PyAP-Based LPs
